# Supplementary material for: Molecular Architecture of Spinal Cord Injury Protein Interaction Network
Source: PubMed Central journal article supplement (PMC4524728; doi:10.1371/journal.pone.0135024), 2015-08-04

# Supplementary Tool S1

Interface for visualizing the subnetworks within each of the rich-club modules

Notes:

- Clicking on each module will show its corresponding subnetwork
- Subnetworks were drawn using STRING evidence view layout

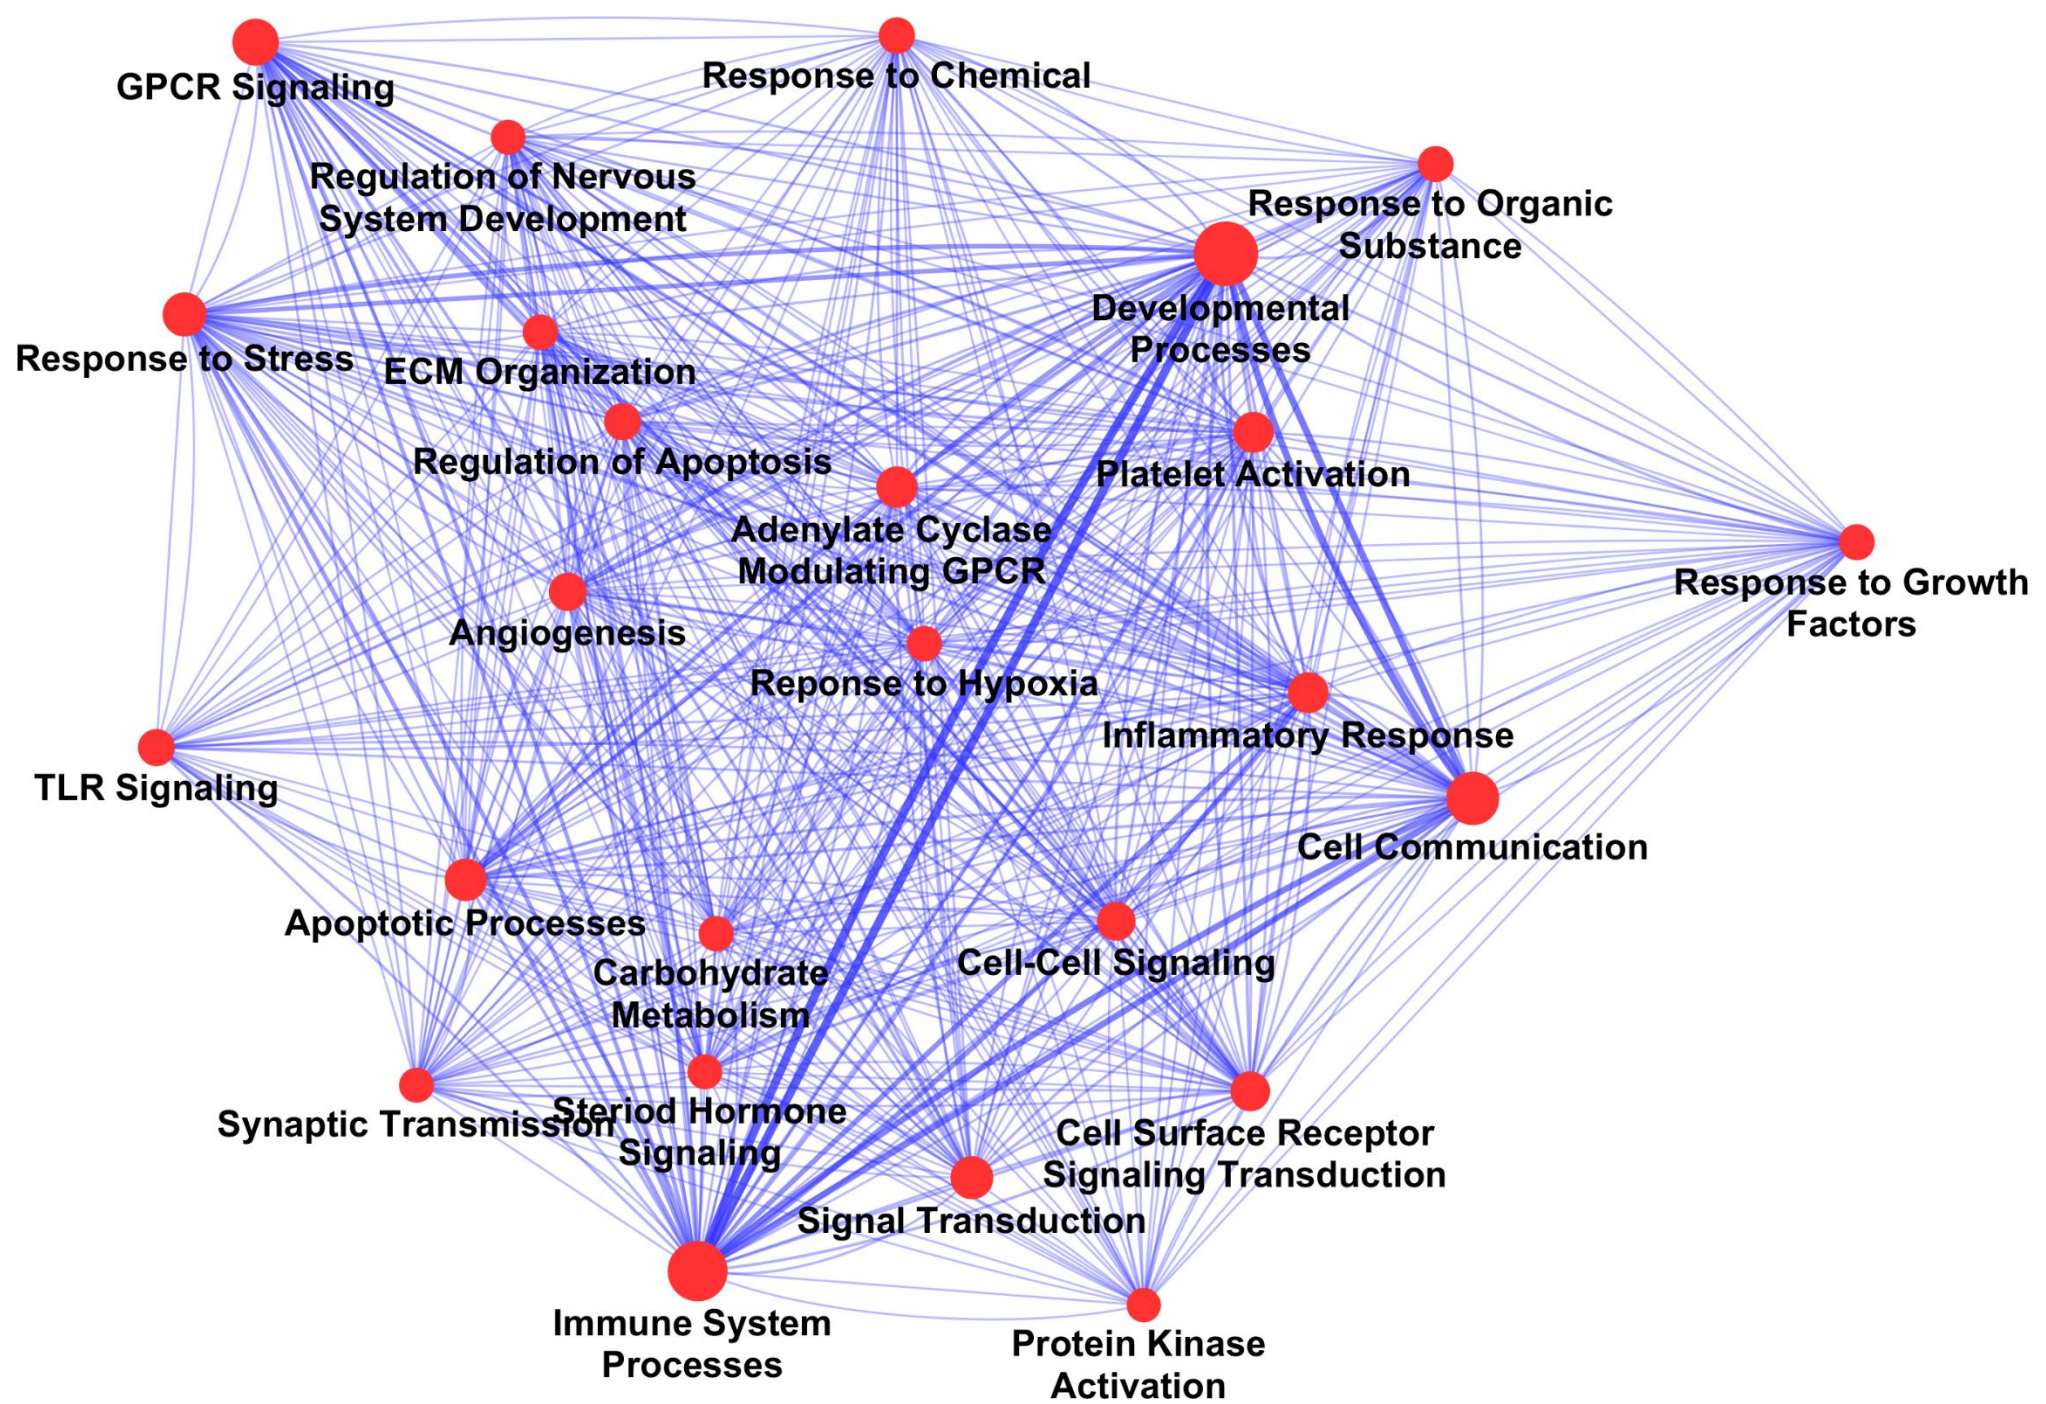

# MODULE 1: GPCR Signaling

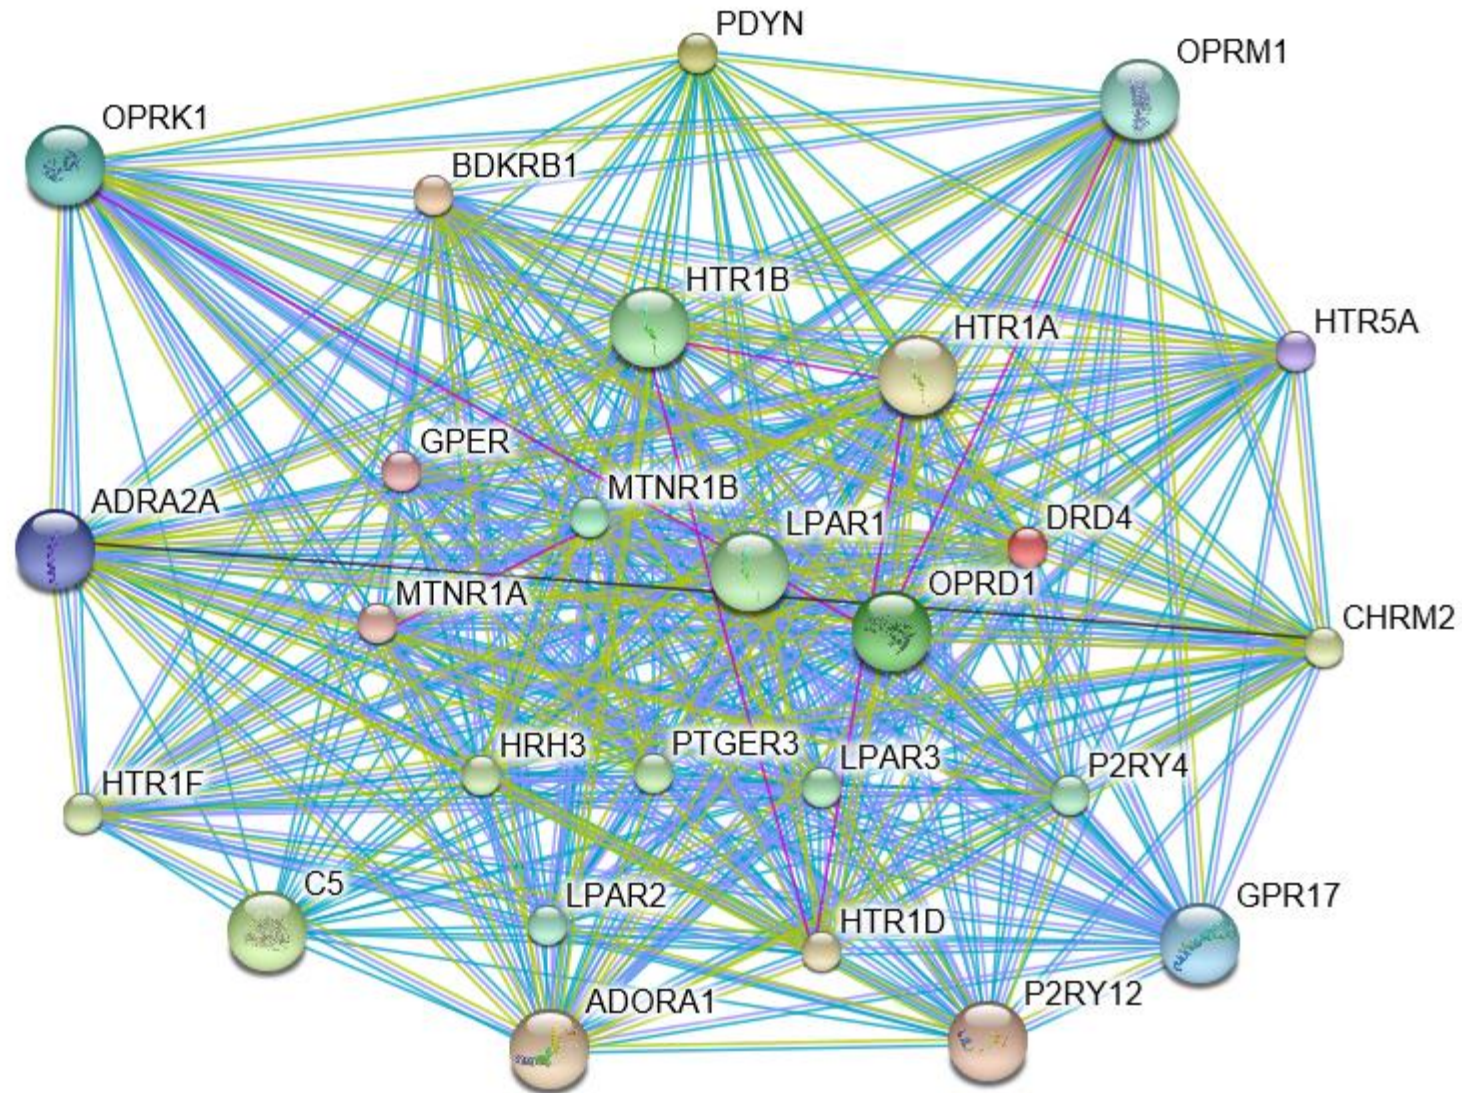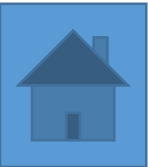

# MODULE 2: Signal Transduction

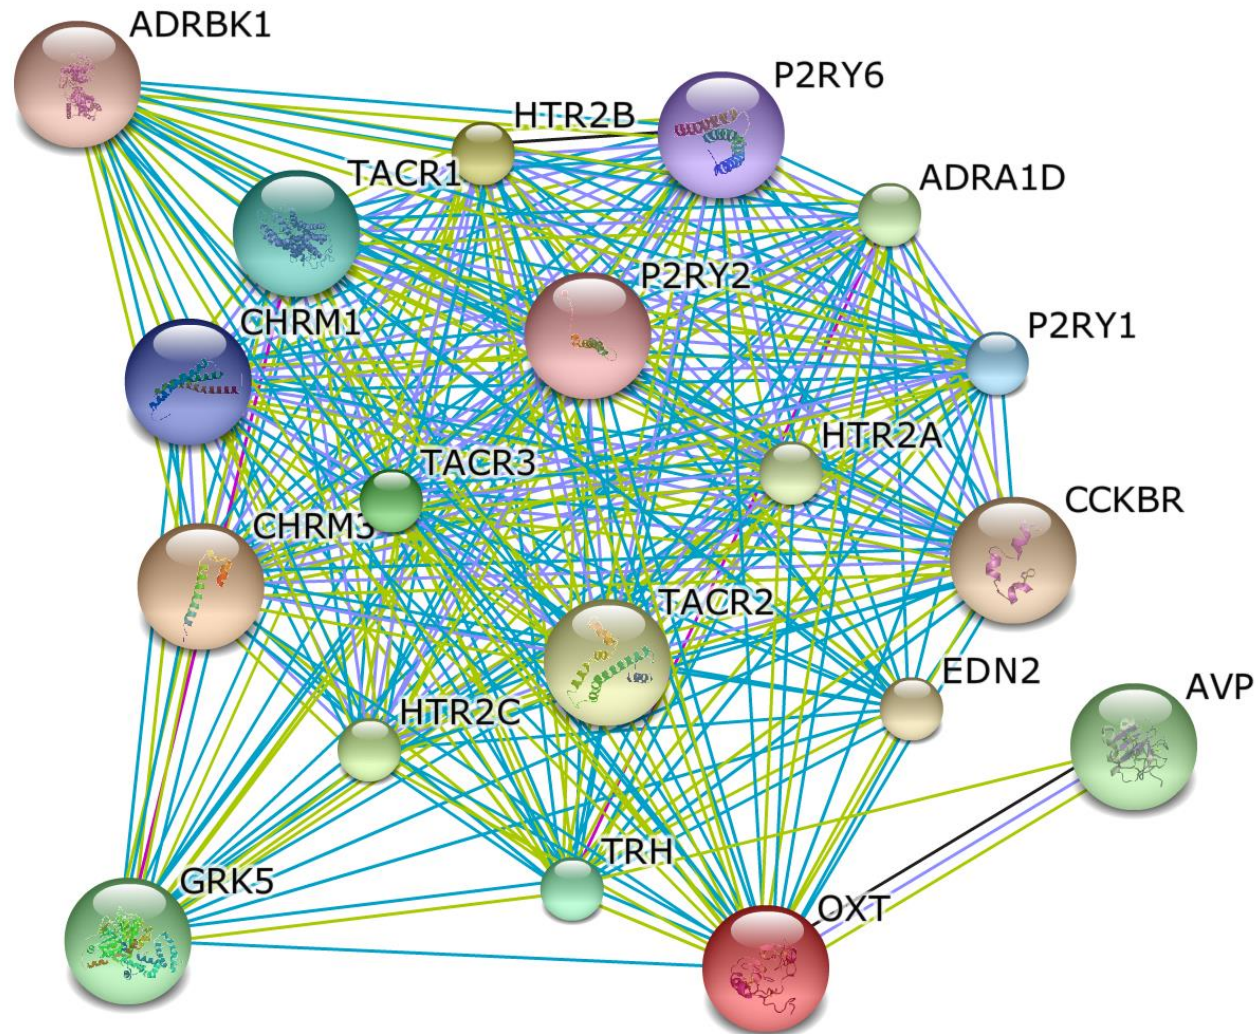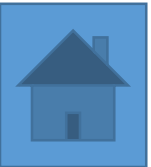





# MODULE 5: Apoptotic Processes

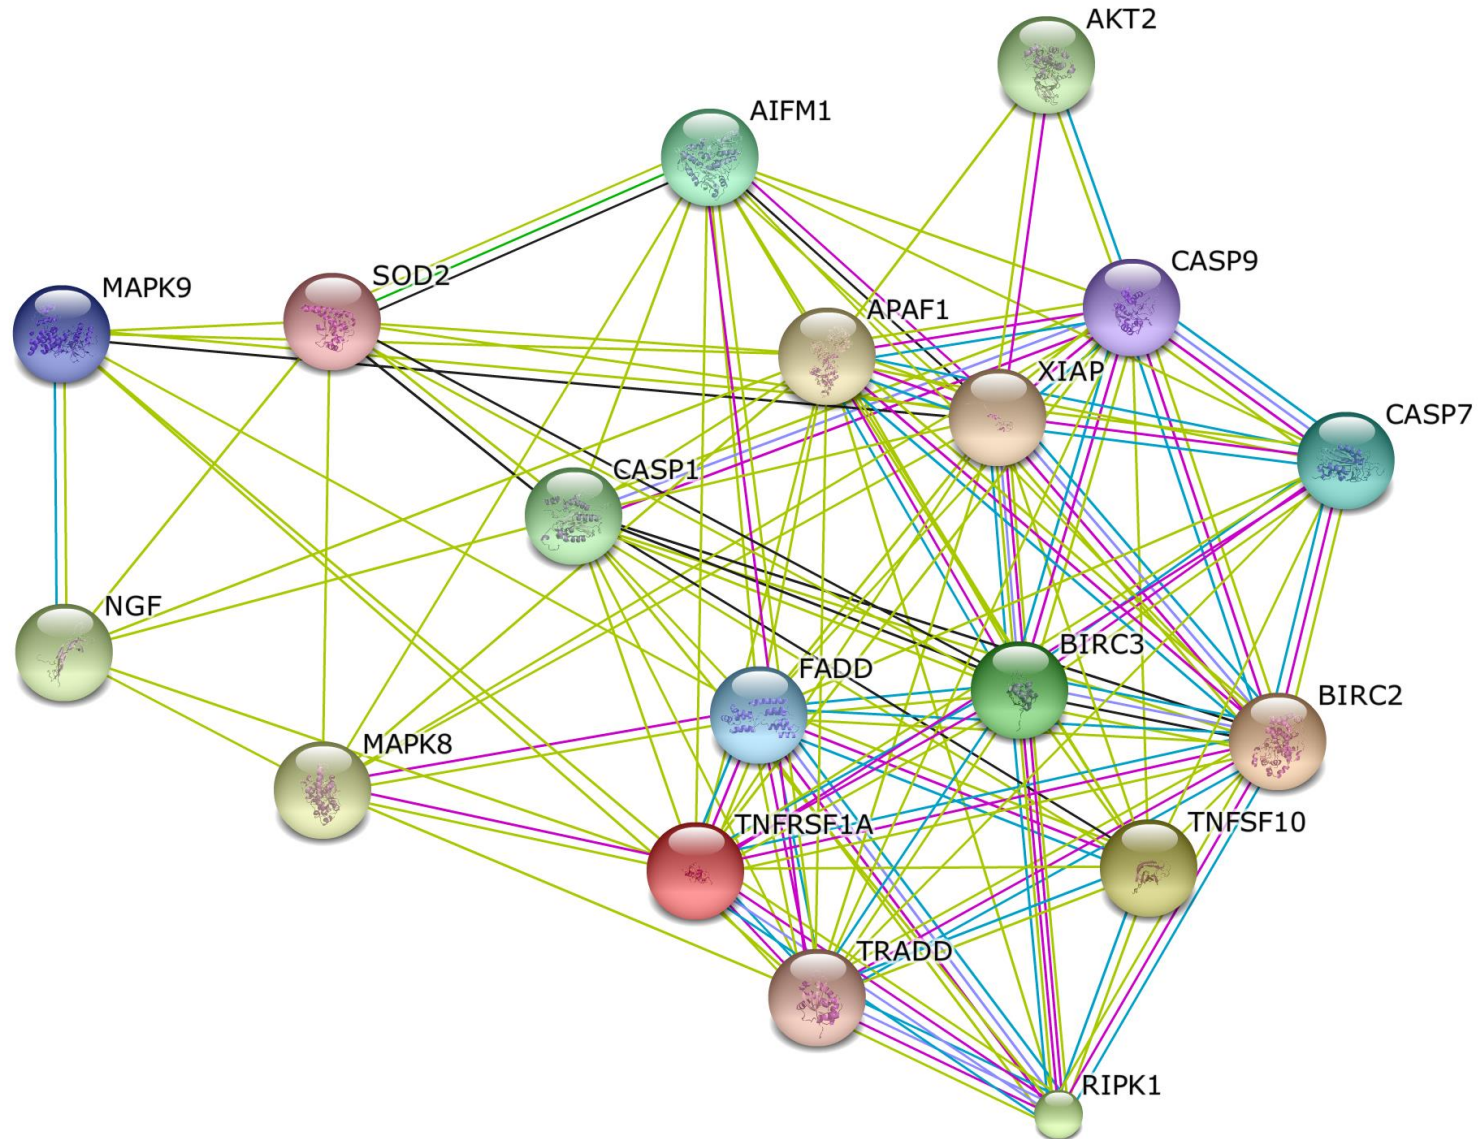

# MODULE 6: Inflammatory Response

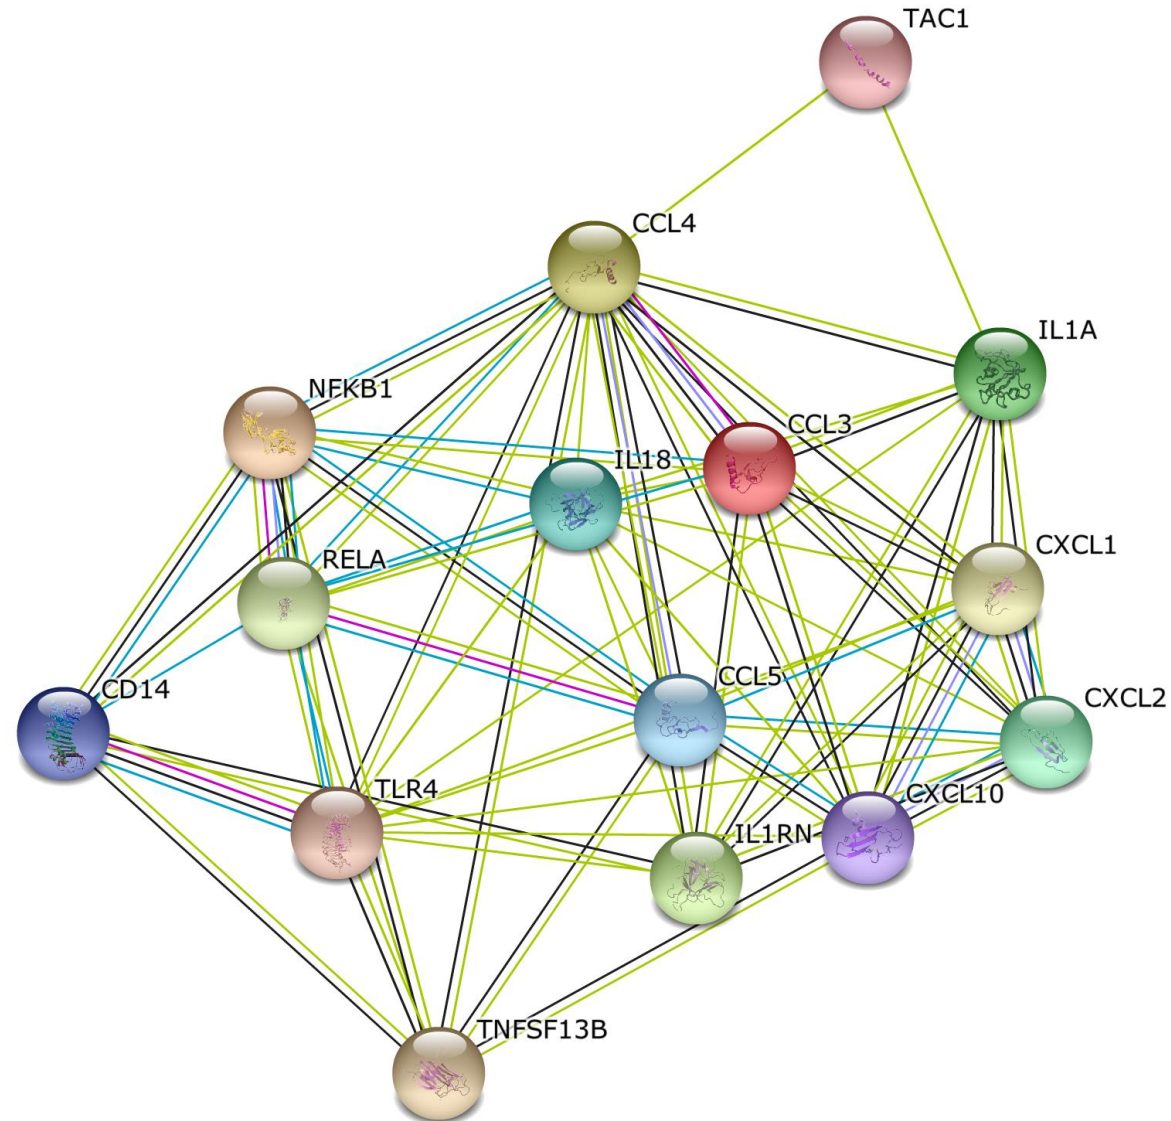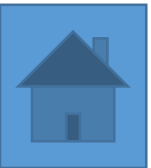



# MODULE 7: Platelet Activation

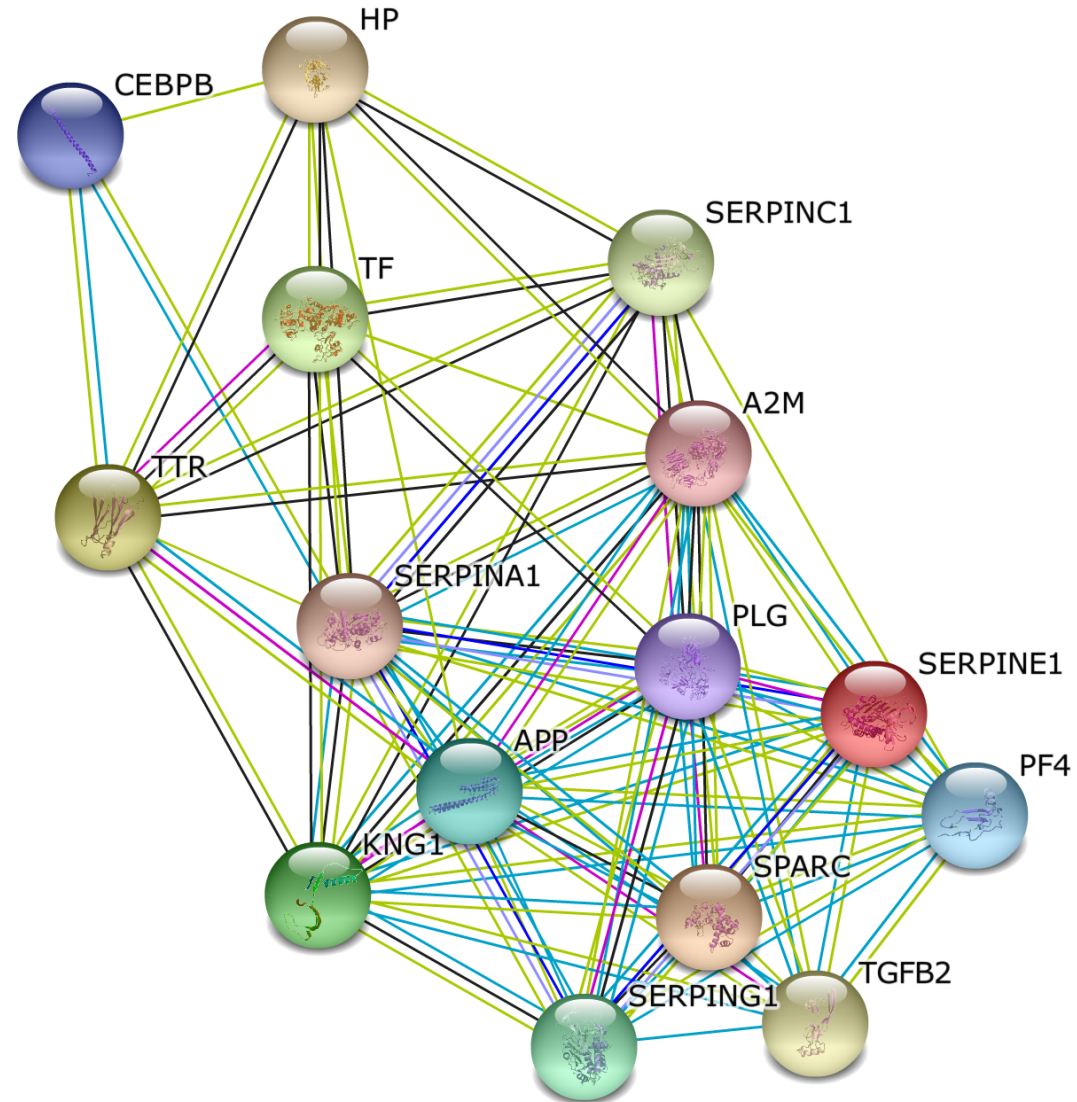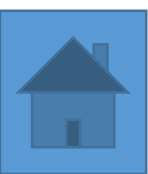

# MODULE 8: Response to stress

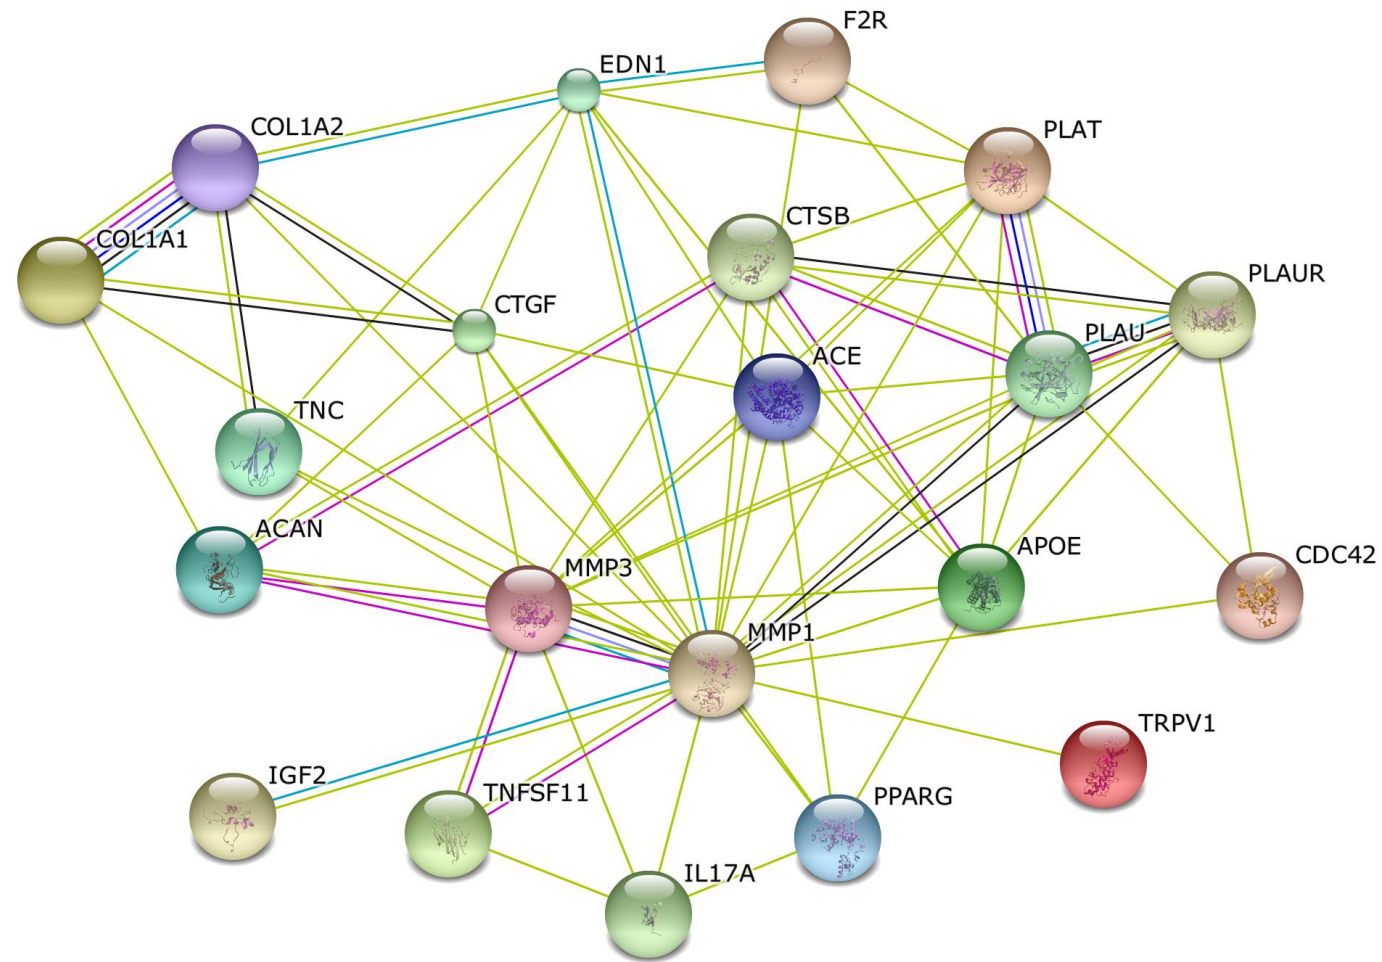

# MODULE 9: Cell Communication

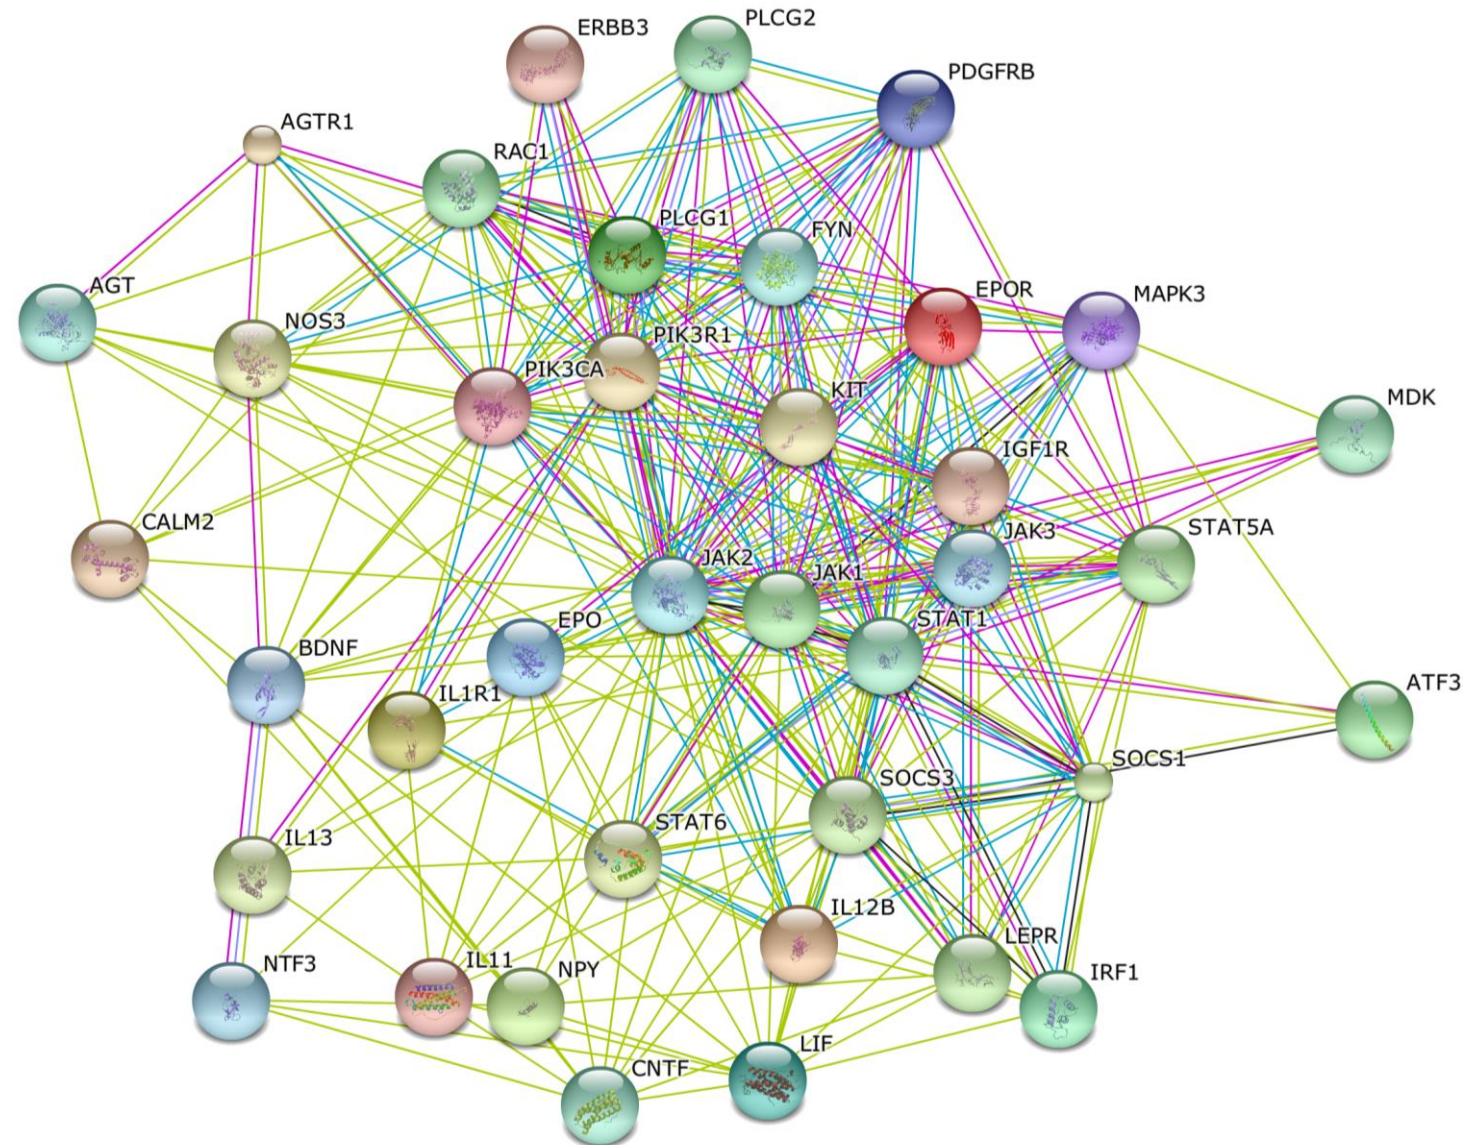

# MODULE 10: Toll-like receptor signaling

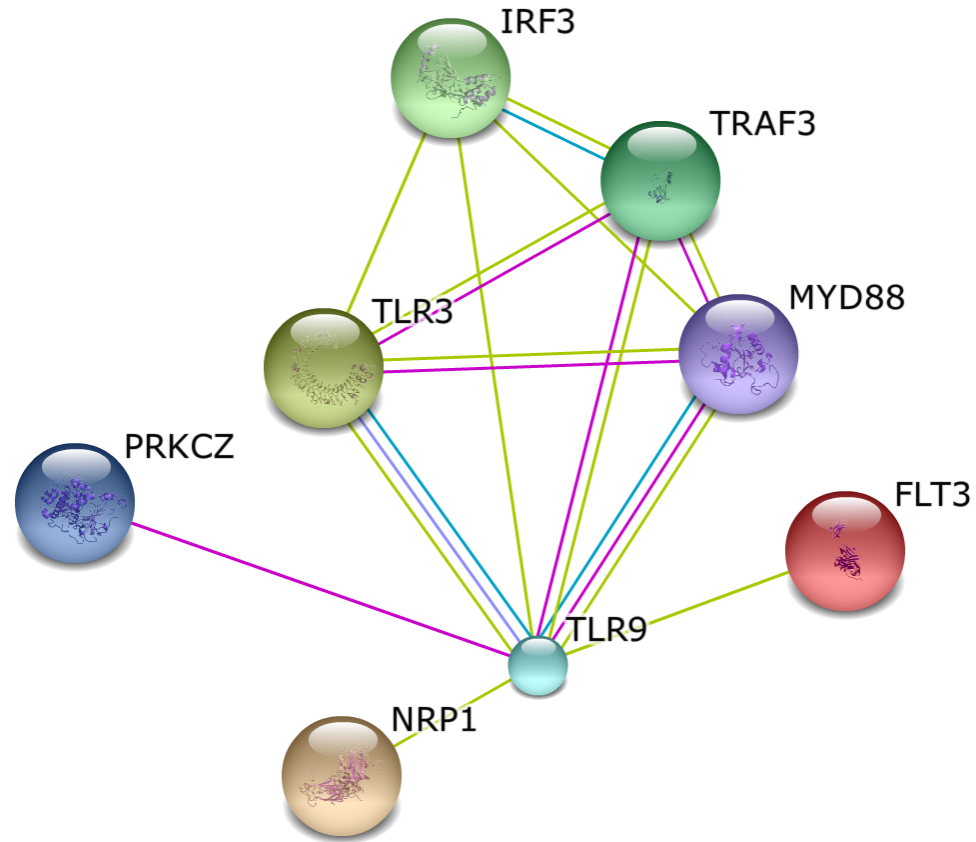



# MODULE 12: Cell surface receptor signaling transduction

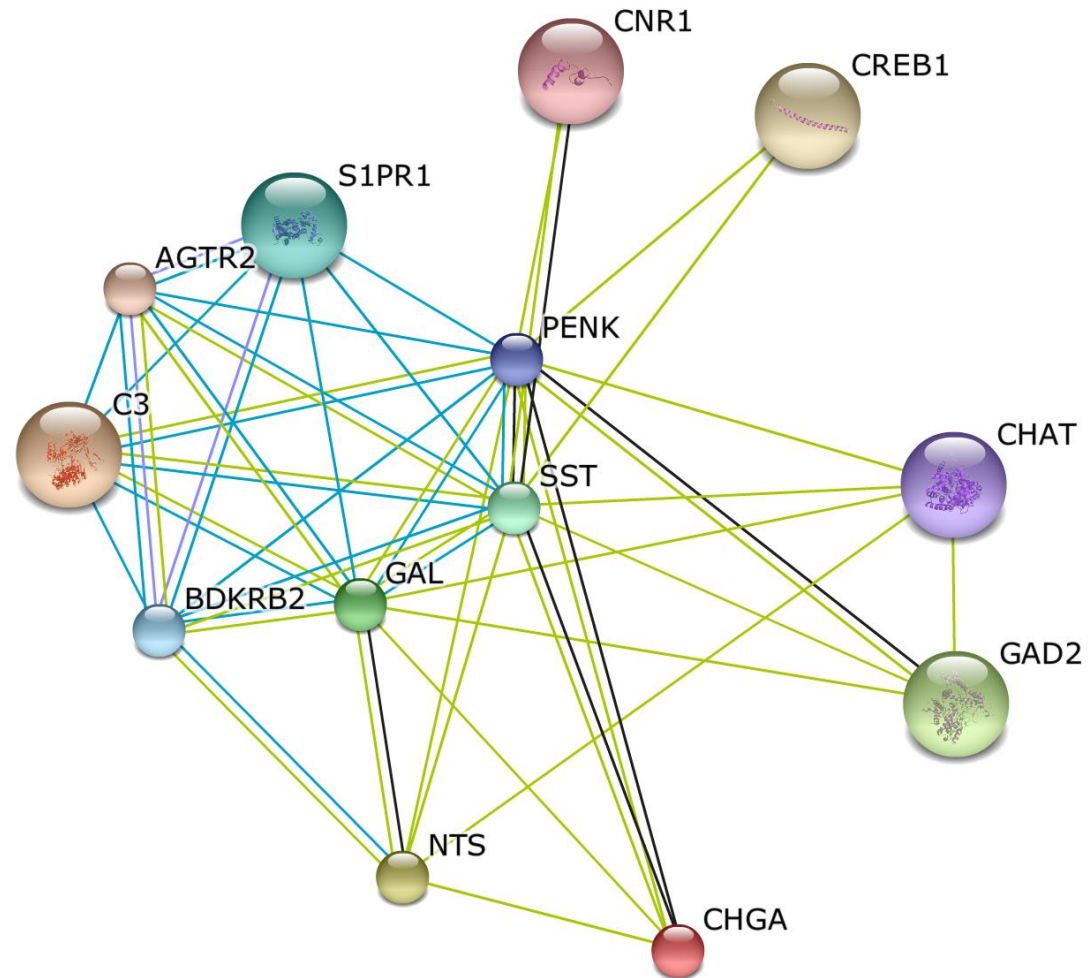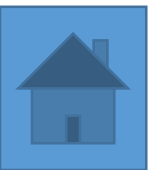

# MODULE 13: Angiogenesis

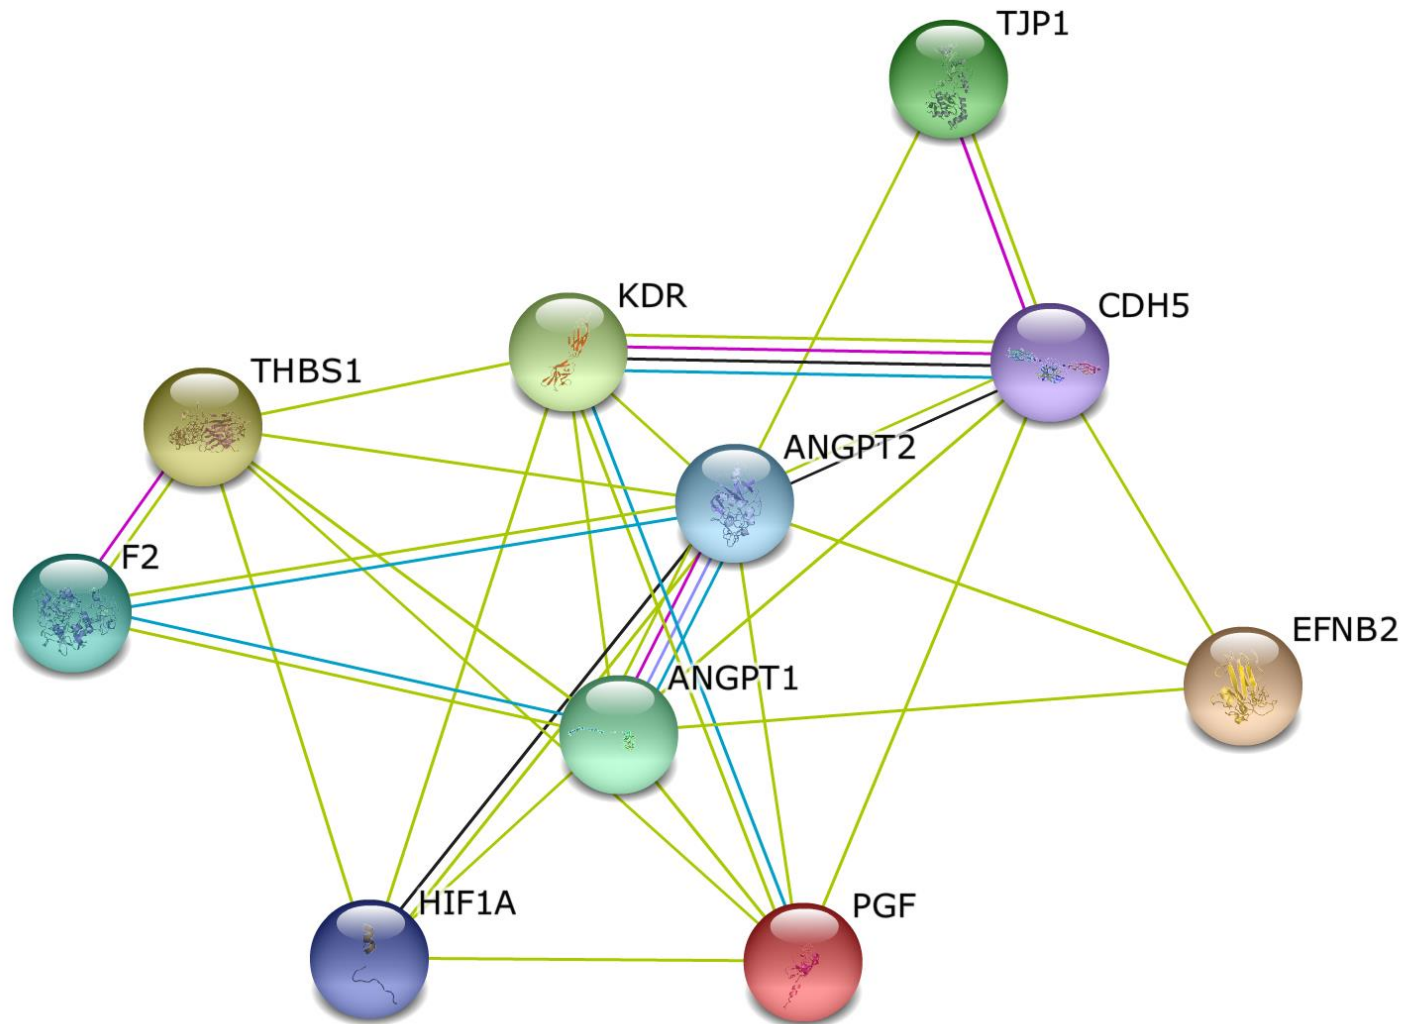

# MODULE 14: Cell-cell signaling

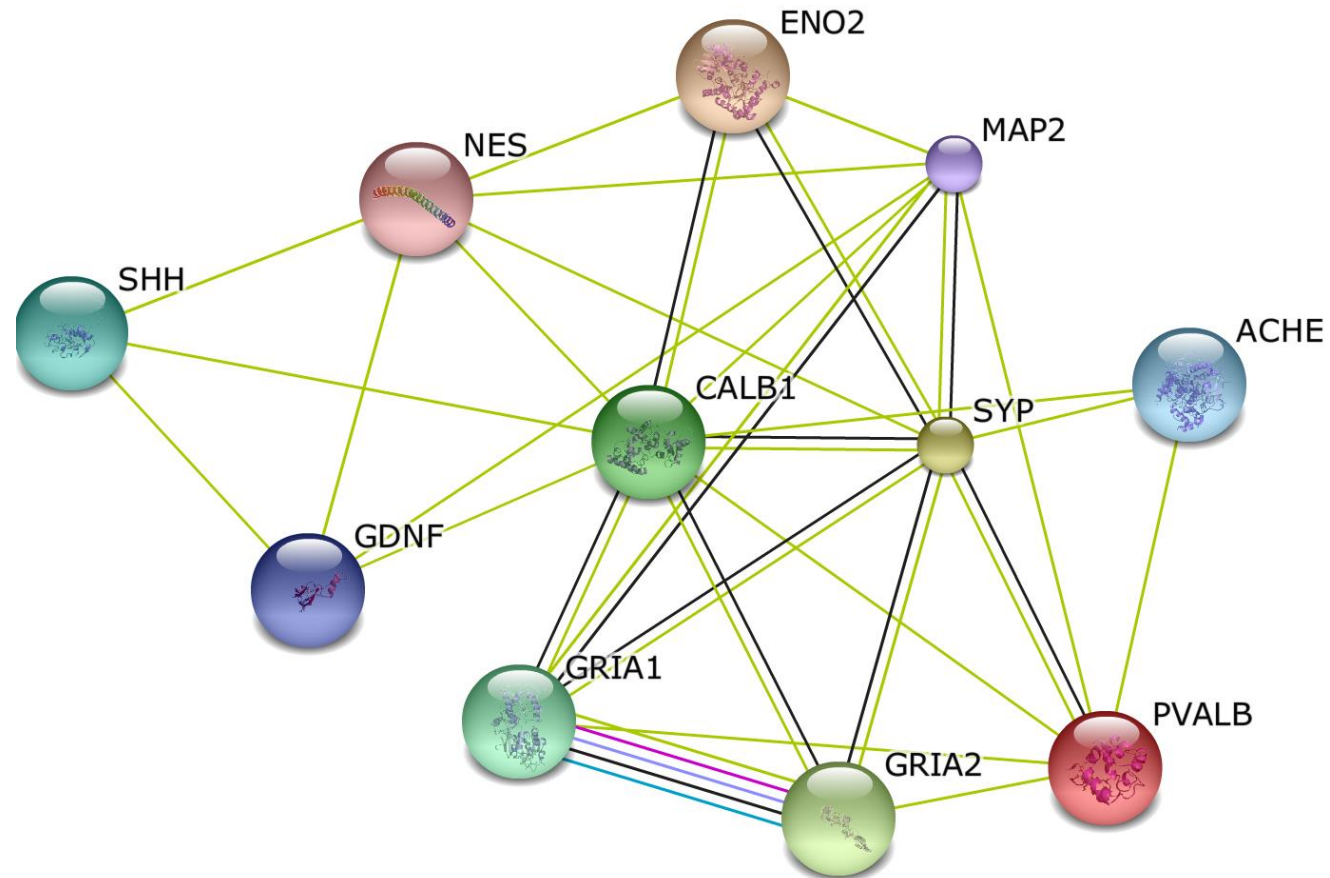



# MODULE 15: Response to hypoxia

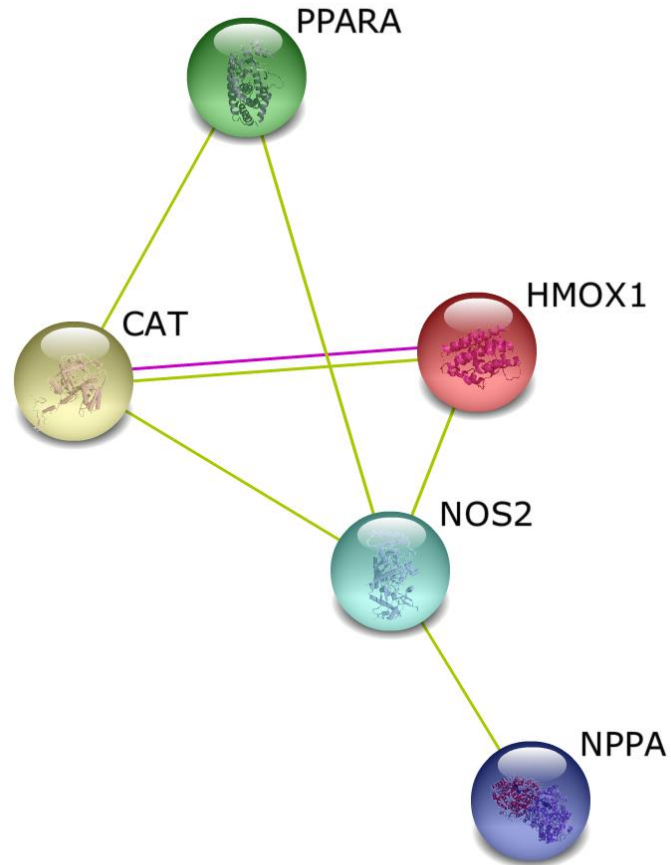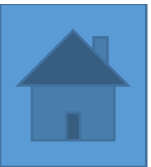

# MODULE 16: Carbohydrate metabolism

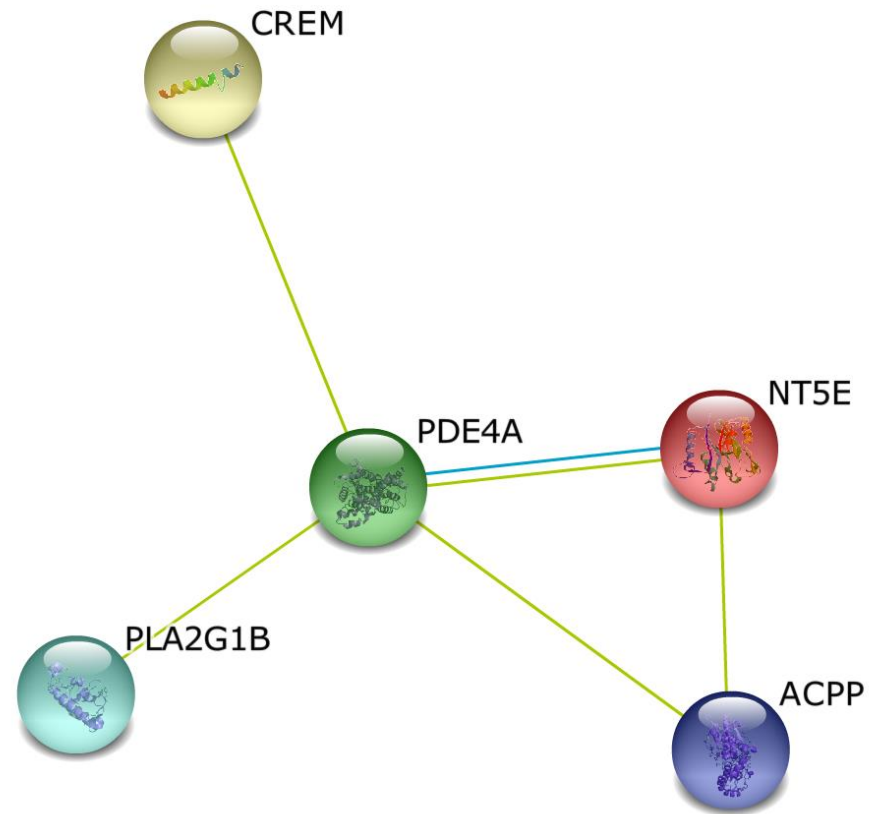

# MODULE 17: Regulation of apoptosis

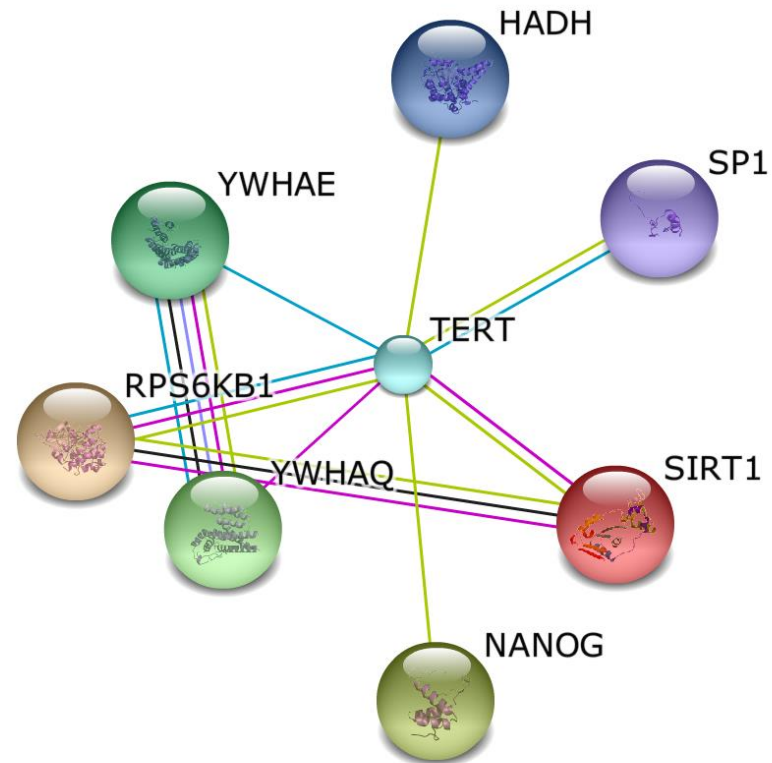

# MODULE 18: Response to organic substance

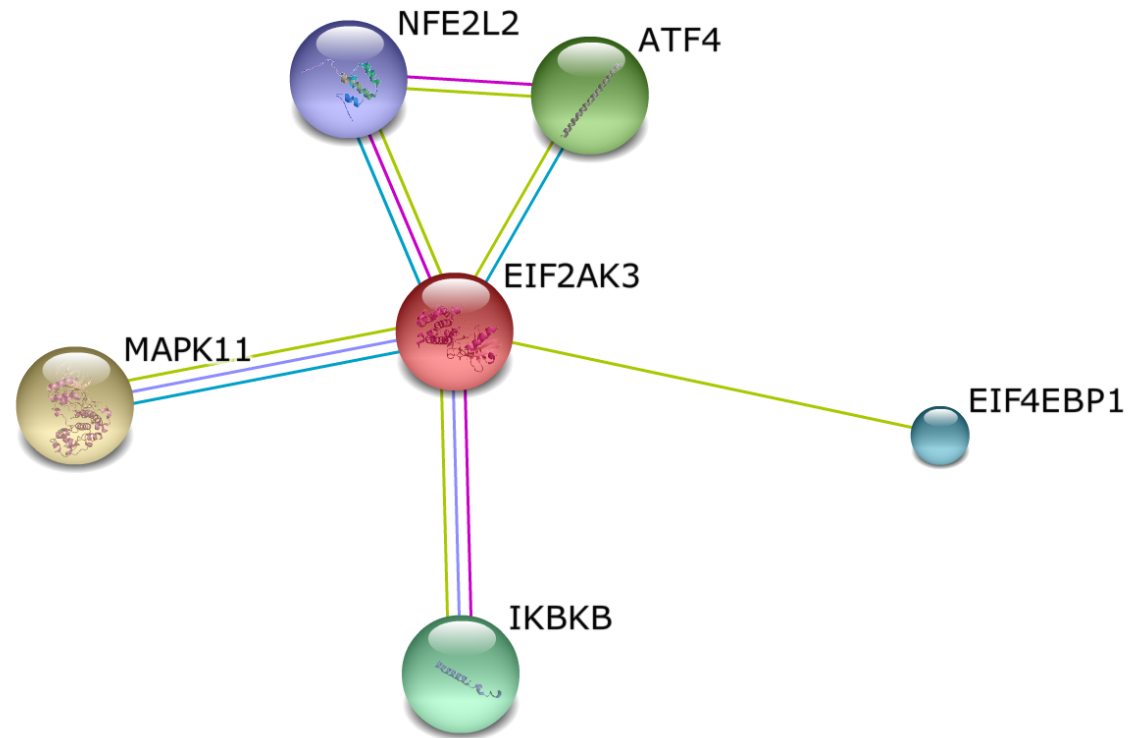

# MODULE 19: Response to chemical

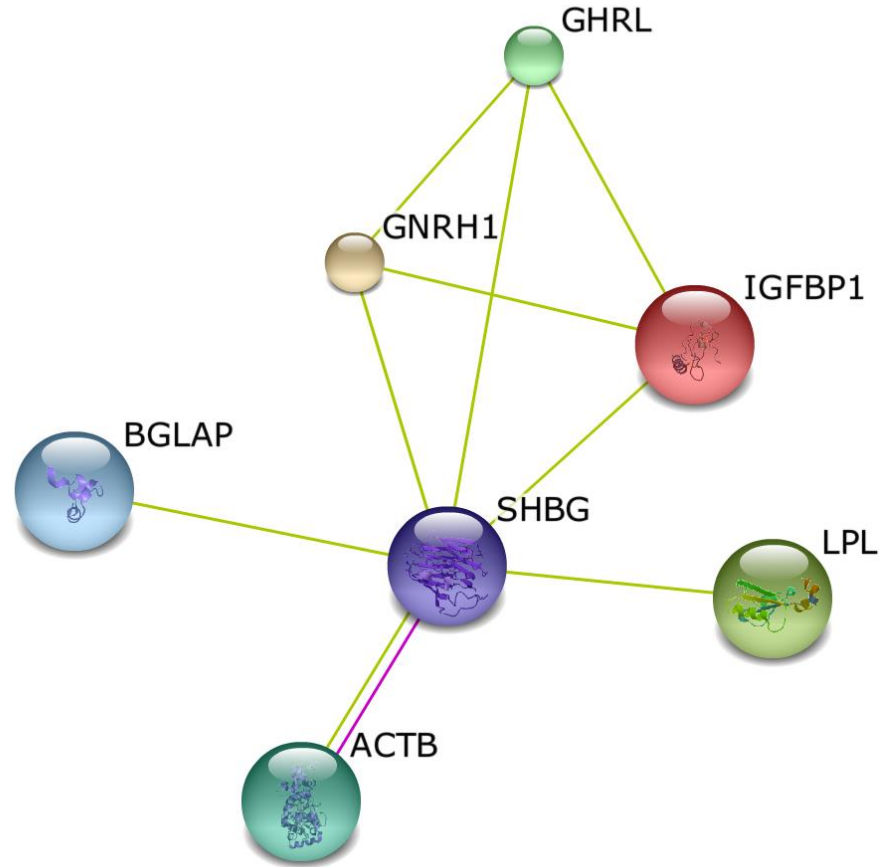

# MODULE 20: Response to Growth Factors

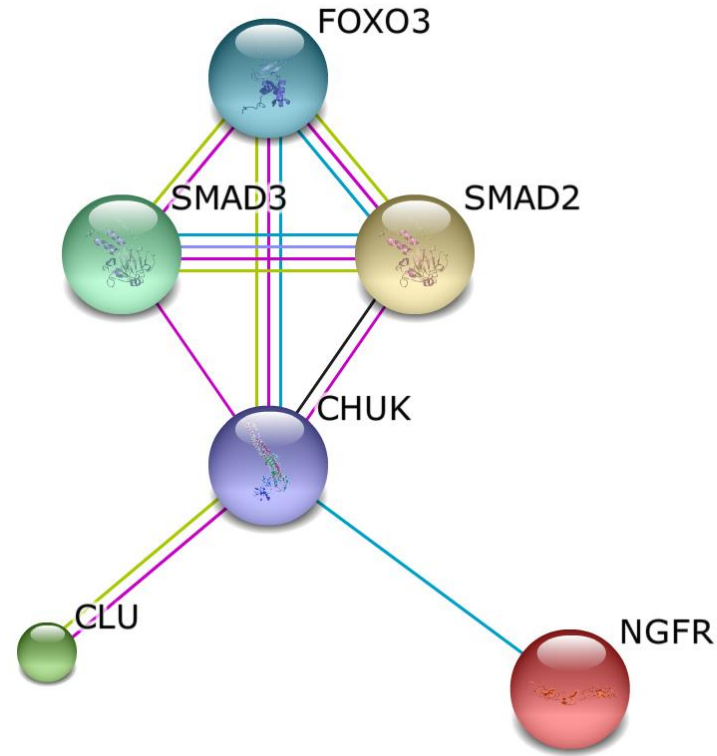

# MODULE 21: Steroid hormone signaling pathway

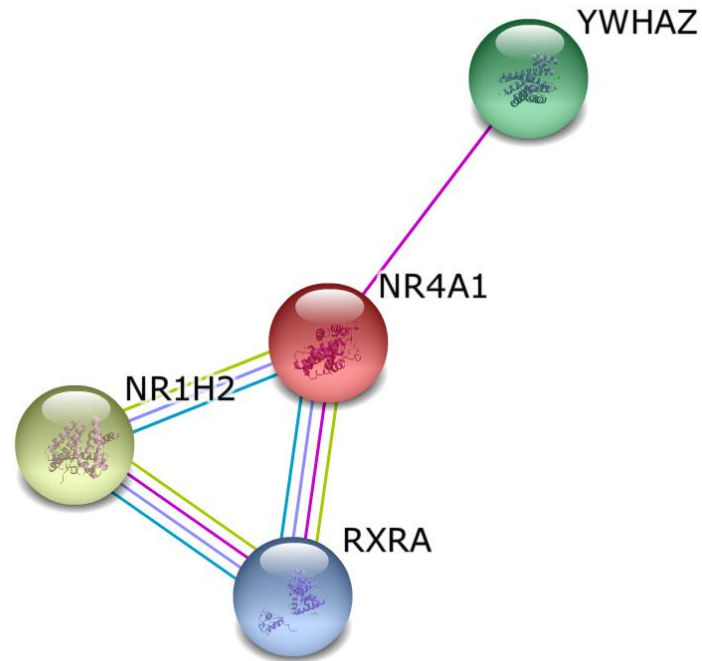

# MODULE 22: Extracellular matrix organization

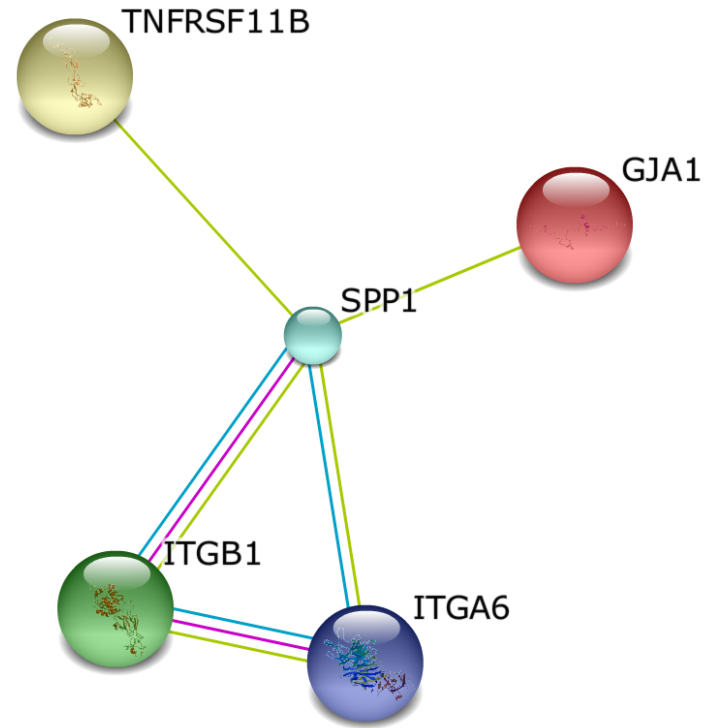



# MODULE 23: Regulation of nervous system development

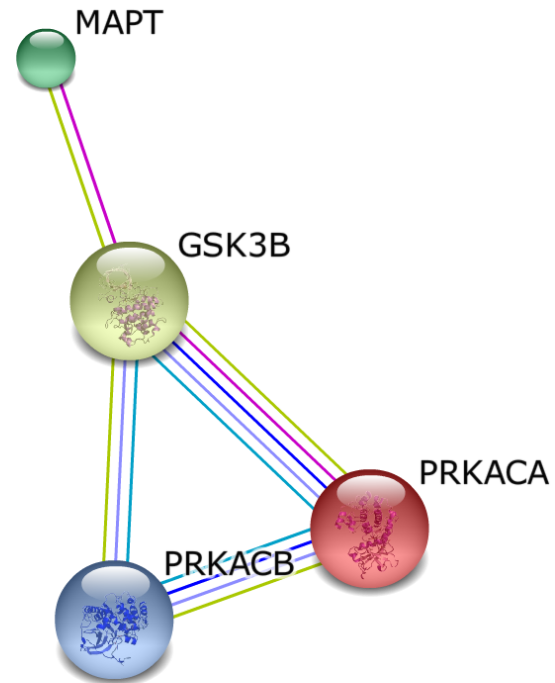

# MODULE 24: Synaptic transmission

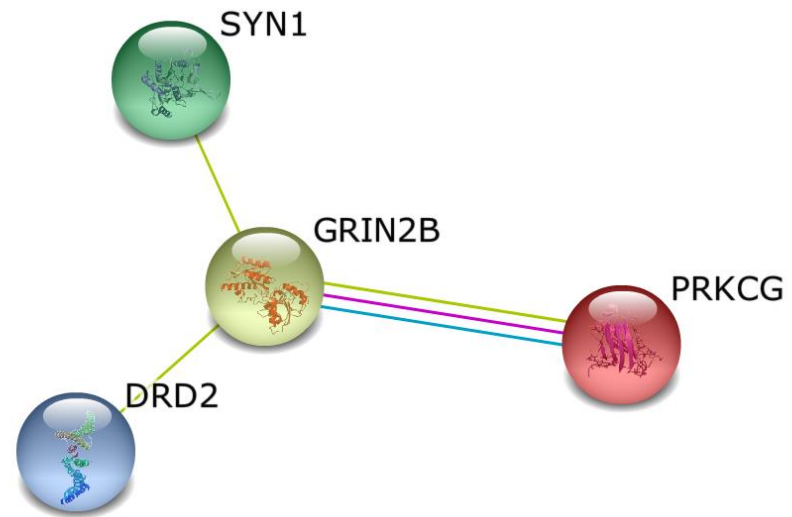

# MODULE 25: Activation of protein kinase activity

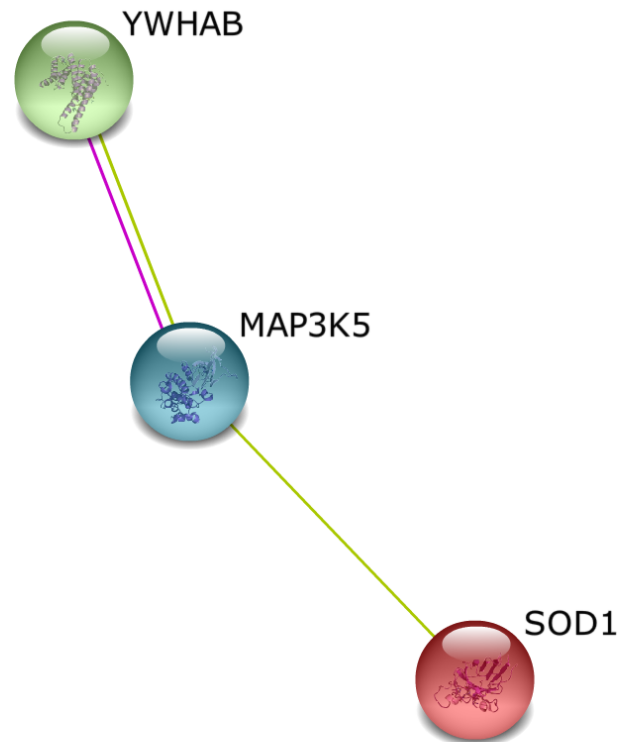

Supplement: pone.0135024.s002.pdf [file pone.0135024.s002.pdf]
