# Supplementary material for: Molecular Architecture of Spinal Cord Injury Protein Interaction Network
Source: PubMed Central journal article supplement (PMC4524728; doi:10.1371/journal.pone.0135024), 2015-08-04
Supplement: pone.0135024.s003.pdf [file pone.0135024.s003.pdf]

**Supplementary Table I. Representative Set of Rules Used in Annotation.**

| <b>Rule #</b> | <b>Description</b>                                                                                                                                                                                                                            |
|---------------|-----------------------------------------------------------------------------------------------------------------------------------------------------------------------------------------------------------------------------------------------|
| 1             | Allowing for plural and singular forms of a name; exception: NOS (for nitric oxide-synthase) does not allow for NO, MR is not included as mineralocorticoid receptor except if context is relevant (can be confused with magnetic resonance). |
| 2             | Allowing for number after the name as well as for a number series split by comma, slash or other delimiters                                                                                                                                   |
| 3             | Allow for ion symbols and names alternatively                                                                                                                                                                                                 |
| 4             | Allow for greek letters or single non-article letters after the name (indicate subunits)                                                                                                                                                      |
| 5             | Allow for use of abbreviations if they have no alternative meaning in English, and indicate those with potential meanings for manual processing                                                                                               |
| 6             | Allow for minor spelling changes, e.g. vowel switching                                                                                                                                                                                        |
| 7             | Allow for presence/absence of a slash, hyphen, brackets, etc.                                                                                                                                                                                 |
| 8             | Allow for detection of matches if non-spaced characters are added from either sides of the word, e.g. GFP-NGF                                                                                                                                 |
| 9             | Detect terms within the context of changes in expression and highlight for manual confirmation; e.g. detect term XXX in sentence: "Spinal cord injury is associated with <b>upregulation</b> of <b>XXX levels</b> in the spinal cord".        |
| 10            | Other minor rules are situation specific and indicated by the annotator.                                                                                                                                                                      |
