# Supplementary material for: Molecular Architecture of Spinal Cord Injury Protein Interaction Network
Source: PubMed Central journal article supplement (PMC4524728; doi:10.1371/journal.pone.0135024), 2015-08-04
Supplement: pone.0135024.s004.pdf [file pone.0135024.s004.pdf]

**Supplementary Table II. Description of tools and databases used in our analysis.**

| <b>Database/<br/>Tool</b> | <b>Full Name</b>                                                    | <b>Use Description</b>                                                                       | <b>Link</b>                                                                                       |
|---------------------------|---------------------------------------------------------------------|----------------------------------------------------------------------------------------------|---------------------------------------------------------------------------------------------------|
| UniProt                   | The Universal Protein Resource                                      | Used for obtaining protein names and accessions                                              | <a href="http://www.uniprot.org/">http://www.uniprot.org/</a>                                     |
| HGNC                      | HUGO Gene Nomenclature Committee                                    | Used for obtaining gene names and accessions                                                 | <a href="http://www.genenames.org/">http://www.genenames.org/</a>                                 |
| DAVID                     | The Database for Annotation, Visualization and Integrated Discovery | Used for functional annotation of the curated accessions and enrichment analysis             | <a href="http://david.abcc.ncifcrf.gov/">http://david.abcc.ncifcrf.gov/</a>                       |
| GO                        | Gene Ontology                                                       | Used for annotation of biological processes and cellular components for different accessions | <a href="http://geneontology.org/">http://geneontology.org/</a>                                   |
| KEGG Pathway              | Kyoto Encyclopedia of Genes and Genomes                             | Used for annotation of KEGG pathways enriched in the network and rich-club                   | <a href="http://www.genome.jp/kegg/">www.genome.jp/kegg/</a>                                      |
| STRING                    | Search Tool for the Retrieval of Interacting Genes/Proteins         | Used for retrieving information on protein-protein interactions                              | <a href="http://string-db.org/">http://string-db.org/</a>                                         |
| PANTHER                   | Panther Classification System                                       | Used to obtain distribution of genes across different enriched GO categories.                | <a href="http://pantherdb.org/">http://pantherdb.org/</a>                                         |
| Cytoscape                 | Cytoscape                                                           | Used for network visualization                                                               | <a href="http://www.cytoscape.org/">http://www.cytoscape.org/</a>                                 |
| SBEToolbox                | MATLAB Systems Biology & Evolution Toolbox                          | MATLAB toolbox used for network analysis                                                     | <a href="http://www.bioinformatics.org/sbetoolbox/">http://www.bioinformatics.org/sbetoolbox/</a> |
