# Supplementary material for: Molecular Architecture of Spinal Cord Injury Protein Interaction Network
Source: PubMed Central journal article supplement (PMC4524728; doi:10.1371/journal.pone.0135024), 2015-08-04
Supplement: pone.0135024.s005.pdf [file pone.0135024.s005.pdf]

**Supplementary Table III. Datasets of all captured terms listed by their UniProt protein accessions and including their frequencies and corresponding references.**

| Uniprot Accession | Frequency | Reference PubMed IDs                                                                                                                                                                                                                                                                                                                |
|-------------------|-----------|-------------------------------------------------------------------------------------------------------------------------------------------------------------------------------------------------------------------------------------------------------------------------------------------------------------------------------------|
| A6NDG6            | 5         | 22947335;12895449;10557125;9890271;9201240                                                                                                                                                                                                                                                                                          |
| A6NFN3            | 36        | 23526403;23386122;23180094;23054070;23001399;22999930;22683506;22484641;21807380;21336655;21215745;21039984;20678995;19818206;18855939;18649176;18627258;18484898;18008145;18001275;17671987;17284176;16978658;16897366;16850748;16004983;15995139;15790679;15672632;15129757;14727128;14697859;14697329;14570283;11893024;11161592 |
| O00168            | 1         | 22275761                                                                                                                                                                                                                                                                                                                            |
| O00206            | 5         | 22520687;21970496;19932745;17403033;19688331                                                                                                                                                                                                                                                                                        |
| O00231            | 1         | 17218363                                                                                                                                                                                                                                                                                                                            |
| O00238            | 1         | 21764678                                                                                                                                                                                                                                                                                                                            |
| O00300            | 6         | 22947224;18398265;15812577;15812577;22947224;18398265                                                                                                                                                                                                                                                                               |
| O00330            | 4         | 20438613;20392143;19119913;2352011                                                                                                                                                                                                                                                                                                  |
| O00451            | 2         | 19235905;16187294                                                                                                                                                                                                                                                                                                                   |
| O00463            | 1         | 22484641                                                                                                                                                                                                                                                                                                                            |
| O00519            | 1         | 18930143                                                                                                                                                                                                                                                                                                                            |
| O00533            | 13        | 22510563;22473292;21337374;20381564;19170182;19150614;18820404;17626035;17611275;16240391;15341588;11212863;9671667                                                                                                                                                                                                                 |
| O00548            | 1         | 22452482                                                                                                                                                                                                                                                                                                                            |
| O00560            | 1         | 23607754                                                                                                                                                                                                                                                                                                                            |
| O00585            | 2         | 23775067;17699671                                                                                                                                                                                                                                                                                                                   |
| O00622            | 1         | 20860549                                                                                                                                                                                                                                                                                                                            |
| O00755            | 1         | 21196217                                                                                                                                                                                                                                                                                                                            |
| O14164            | 2         | 22289688;15478370                                                                                                                                                                                                                                                                                                                   |
| O14511            | 3         | 14618270;11797086;11241740                                                                                                                                                                                                                                                                                                          |
| O14531            | 1         | 22181040                                                                                                                                                                                                                                                                                                                            |
| O14543            | 3         | 22815920;16783372;11723173                                                                                                                                                                                                                                                                                                          |
| O14558            | 1         | 21655070                                                                                                                                                                                                                                                                                                                            |
| O14594            | 25        | 23702016;23027580;23001399;22525856;22079829;21952042;20925461;20554625;19604403;18765417;18618667;18001203;17540369;17141961;16629625;15016081;14561854;12895450;12573465;12526031;12440375;11923444;11425904;11272642;10482014                                                                                                    |
| O14638            | 3         | 24206033;21676683;16301263                                                                                                                                                                                                                                                                                                          |
| O14727            | 1         | 21748659                                                                                                                                                                                                                                                                                                                            |
| O14746            | 3         | 23793903;19908289;15798365                                                                                                                                                                                                                                                                                                          |
| O14763            | 1         | 20107429                                                                                                                                                                                                                                                                                                                            |
| O14786            | 6         | 23116416;15737738;15094469;12927201;11029637;10192772                                                                                                                                                                                                                                                                               |
| O14788            | 5         | 15812577;22947224;15812577;22947224;18398265                                                                                                                                                                                                                                                                                        |
| O14791            | 1         | 11170729                                                                                                                                                                                                                                                                                                                            |
| O14920            | 3         | 21469085;22289688;15478370                                                                                                                                                                                                                                                                                                          |
| O15033            | 1         | 22161971                                                                                                                                                                                                                                                                                                                            |
| O15041            | 1         | 12009760                                                                                                                                                                                                                                                                                                                            |
| O15054            | 1         | 22578249                                                                                                                                                                                                                                                                                                                            |
| O15066            | 1         | 23093447                                                                                                                                                                                                                                                                                                                            |

|        |    |                                                                                                                                                                                                                                                                                                                                                                                                                                                                                                                                                                                                                                                 |
|--------|----|-------------------------------------------------------------------------------------------------------------------------------------------------------------------------------------------------------------------------------------------------------------------------------------------------------------------------------------------------------------------------------------------------------------------------------------------------------------------------------------------------------------------------------------------------------------------------------------------------------------------------------------------------|
| O15111 | 5  | 23499960;21134362;22289688;15478370;23880092                                                                                                                                                                                                                                                                                                                                                                                                                                                                                                                                                                                                    |
| O15117 | 1  | 18680553                                                                                                                                                                                                                                                                                                                                                                                                                                                                                                                                                                                                                                        |
| O15118 | 1  | 18751914                                                                                                                                                                                                                                                                                                                                                                                                                                                                                                                                                                                                                                        |
| O15123 | 2  | 23562792;22020092                                                                                                                                                                                                                                                                                                                                                                                                                                                                                                                                                                                                                               |
| O15240 | 1  | 19846725                                                                                                                                                                                                                                                                                                                                                                                                                                                                                                                                                                                                                                        |
| O15264 | 38 | 23688865;23404572;22821814;22733360;22634758;22525836;21922518;21394310;20954833;20943915;20444938;20382225;20161735;19846725;19765637;19699199;19418456;19409102;19090911;18708926;18590729;18562123;18511041;18209489;17634369;17443214;16978658;16930431;16511963;16478624;16422251;16187294;16038625;15843065;15320513;14512145;12810381;10331432                                                                                                                                                                                                                                                                                           |
| O15392 | 1  | 16230180                                                                                                                                                                                                                                                                                                                                                                                                                                                                                                                                                                                                                                        |
| O15399 | 72 | 22159095;21995852;16289170;23618680;22650041;22650040;22449374;22402659;21756907;20675200;20495588;20211179;19939961;19923273;19772458;19668258;19407255;19026989;19019202;19005051;18635178;18484790;18177675;18053028;17983769;17287199;16703907;16678969;15950221;15901762;15748877;15640756;15313031;14758350;12903514;12885421;12162901;11992467;11107569;11101210;11043549;11007881;10984543;10720616;10674755;10486193;10419375;9918969;9773443;10921077;9048311;9002066;8985951;9594166;8880851;8657340;8584148;7472559;7889371;8207481;7909561;8137170;8103243;1588610;1311880;1837648;2163498;2155794;2377900;1982014;2841902;3057216 |
| O15455 | 1  | 19688331                                                                                                                                                                                                                                                                                                                                                                                                                                                                                                                                                                                                                                        |
| O15496 | 1  | 19306380                                                                                                                                                                                                                                                                                                                                                                                                                                                                                                                                                                                                                                        |
| O15516 | 2  | 11224015;10811391                                                                                                                                                                                                                                                                                                                                                                                                                                                                                                                                                                                                                               |
| O15524 | 1  | 18205174                                                                                                                                                                                                                                                                                                                                                                                                                                                                                                                                                                                                                                        |
| O15530 | 1  | 22749575                                                                                                                                                                                                                                                                                                                                                                                                                                                                                                                                                                                                                                        |
| O15540 | 10 | 22469052;21931744;21574060;20155816;20151365;19418545;15869942;15548666;14644473;12098653                                                                                                                                                                                                                                                                                                                                                                                                                                                                                                                                                       |
| O43396 | 1  | 22466292                                                                                                                                                                                                                                                                                                                                                                                                                                                                                                                                                                                                                                        |
| O43474 | 3  | 21949375;20030221;18712509                                                                                                                                                                                                                                                                                                                                                                                                                                                                                                                                                                                                                      |
| O43490 | 5  | 23498368;22246536;20806064;20374199;20029964                                                                                                                                                                                                                                                                                                                                                                                                                                                                                                                                                                                                    |
| O43524 | 3  | 22930444;19533653;22930444                                                                                                                                                                                                                                                                                                                                                                                                                                                                                                                                                                                                                      |
| O43741 | 2  | 22865656;17885021                                                                                                                                                                                                                                                                                                                                                                                                                                                                                                                                                                                                                               |
| O43772 | 1  | 23011062                                                                                                                                                                                                                                                                                                                                                                                                                                                                                                                                                                                                                                        |
| O43916 | 1  | 20427653                                                                                                                                                                                                                                                                                                                                                                                                                                                                                                                                                                                                                                        |
| O43921 | 1  | 21603973                                                                                                                                                                                                                                                                                                                                                                                                                                                                                                                                                                                                                                        |
| O60259 | 1  | 24128681                                                                                                                                                                                                                                                                                                                                                                                                                                                                                                                                                                                                                                        |
| O60266 | 6  | 20141154;19119913;18677446;15698618;10804204;3548963                                                                                                                                                                                                                                                                                                                                                                                                                                                                                                                                                                                            |
| O60344 | 1  | 17259328                                                                                                                                                                                                                                                                                                                                                                                                                                                                                                                                                                                                                                        |
| O60391 | 69 | 23618680;22650041;22650040;22449374;22402659;21756907;20675200;20495588;20211179;19939961;19923273;19772458;19668258;19407255;19026989;19019202;19005051;18635178;18484790;18177675;18053028;17983769;17287199;16703907;16678969;15950221;15901762;15748877;15640756;15313031;14758350;12903514;12885421;12162901;11992467;11107569;11101210;11043549;11007881;10984543;10720616;10674755;10486193;10419375;9918969;9773443;10921077;9048311;9002066;8985951;9594166;8880851;8657340;8584148;7472559;7889371;8207481;7909561;8137170;8103243;1588610;1311880;1837648;2163498;2155794;2377900;1982014;2841902;3057216                            |
| O60462 | 1  | 15094469                                                                                                                                                                                                                                                                                                                                                                                                                                                                                                                                                                                                                                        |

|        |    |                                                                                                                                                                                                       |
|--------|----|-------------------------------------------------------------------------------------------------------------------------------------------------------------------------------------------------------|
| O60603 | 4  | 22520687;19932745;17403033;19688331                                                                                                                                                                   |
| O60609 | 2  | 19235905;16187294                                                                                                                                                                                     |
| O60674 | 10 | 23274522;15716400;10762348;22815920;20155820;17131417;16957585;16890196;22715999;20161735                                                                                                             |
| O60706 | 1  | 17108688                                                                                                                                                                                              |
| O60733 | 11 | 22581384;21142140;20127525;18755070;17917587;16566026;16498630;15248295;11499402;8522975;7473799                                                                                                      |
| O60760 | 3  | 22520473;21294159;19159657                                                                                                                                                                            |
| O60840 | 5  | 17448606;14753480;10924962;10222112;9007541                                                                                                                                                           |
| O60938 | 1  | 22114278                                                                                                                                                                                              |
| O75015 | 1  | 19770513                                                                                                                                                                                              |
| O75093 | 1  | 16262652                                                                                                                                                                                              |
| O75094 | 1  | 16262652                                                                                                                                                                                              |
| O75116 | 22 | 19955379;19623163;24297045;21815784;19623163;18722369;17217414;18980476;22733360;20141964;19955379;19651108;17692017;16624299;16154567;15880494;15799964;15293235;15219678;12480155;12151536;11471206 |
| O75173 | 3  | 22420304;11425904;23562508                                                                                                                                                                            |
| O75293 | 1  | 20702718                                                                                                                                                                                              |
| O75326 | 1  | 20645410                                                                                                                                                                                              |
| O75460 | 3  | 22873727;22815920;21638341                                                                                                                                                                            |
| O75508 | 1  | 21638341                                                                                                                                                                                              |
| O75593 | 1  | 17538368                                                                                                                                                                                              |
| O75616 | 19 | 23758347;23548992;23229514;22850839;22658000;20838402;20593987;16629619;16383250;16122000;15561548;15291017;15264793;14988583;11893023;7526456;1675444;7069836;1160690                                |
| O75762 | 1  | 21367919                                                                                                                                                                                              |
| O75840 | 1  | 22529377                                                                                                                                                                                              |
| O75888 | 1  | 23088438                                                                                                                                                                                              |
| O75899 | 5  | 18495826;23904624;22721766;22449374;16866624                                                                                                                                                          |
| O76074 | 18 | 23347150;22925748;22837080;22275187;21970599;21036463;20157304;19875292;19686427;19210710;19138363;19057138;18595542;17083398;16198718;14671658;12767372;11402584                                     |
| O94759 | 2  | 23828570;23512594                                                                                                                                                                                     |
| O94788 | 4  | 17671987;17239557;16688771;15845083                                                                                                                                                                   |
| O94813 | 6  | 19843094;19783284;18377713;17978191;16262652;19783284                                                                                                                                                 |
| O95025 | 1  | 12009760                                                                                                                                                                                              |
| O95096 | 6  | 19318112;19257808;19053058;17600517;17108169;14648541                                                                                                                                                 |
| O95140 | 1  | 23727406                                                                                                                                                                                              |
| O95185 | 1  | 16998900                                                                                                                                                                                              |
| O95249 | 2  | 19286942;17933964                                                                                                                                                                                     |
| O95452 | 3  | 22951907;22399755;22951907                                                                                                                                                                            |
| O95631 | 6  | 20132768;18377713;18234888;17978191;16998900;16262652                                                                                                                                                 |
| O95786 | 1  | 22161971                                                                                                                                                                                              |
| O95831 | 6  | 23828570;19473058;19120440;17298387;16689664;15857303                                                                                                                                                 |
| O95847 | 1  | 18534681                                                                                                                                                                                              |
| P00338 | 14 | 23793797;23647384;21529317;19998478;19485254;12852839;12509801;11417439;9362426;8145266;1984104;2718797;6526578;6822753                                                                               |

|        |    |                                                                                                                                                                                                                                                                                                                                                                                                                                                                                                                               |
|--------|----|-------------------------------------------------------------------------------------------------------------------------------------------------------------------------------------------------------------------------------------------------------------------------------------------------------------------------------------------------------------------------------------------------------------------------------------------------------------------------------------------------------------------------------|
| P00367 | 1  | 19119913                                                                                                                                                                                                                                                                                                                                                                                                                                                                                                                      |
| P00390 | 2  | 16503801;11149912                                                                                                                                                                                                                                                                                                                                                                                                                                                                                                             |
| P00395 | 8  | 20438613;20144890;15236240;14614091;11711863;9165429;2358556;6246648                                                                                                                                                                                                                                                                                                                                                                                                                                                          |
| P00403 | 8  | 20438613;20144890;15236240;14614091;11711863;9165429;2358556;6246648                                                                                                                                                                                                                                                                                                                                                                                                                                                          |
| P00414 | 8  | 20438613;20144890;15236240;14614091;11711863;9165429;2358556;6246648                                                                                                                                                                                                                                                                                                                                                                                                                                                          |
| P00439 | 3  | 21087927;20714874;12598950                                                                                                                                                                                                                                                                                                                                                                                                                                                                                                    |
| P00441 | 58 | 21946609;21078175;20005223;18947433;18722523;18352832;17457363;16689664;15896972;23523995;21111721;20817464;20364349;19875292;19563509;19473058;18407497;18289003;17486444;17184187;16689664;16634331;16332351;16187294;16095570;16018585;15864722;15792522;15684769;15610928;15207346;15036352;14767765;14666020;14644473;12657369;12213642;11977524;11853017;11453434;11200253;11032904;11011974;10815757;10437099;10322962;9726263;9680175;9313901;8973665;8915909;7478738;7701506;7841663;1414256;2058414-2244484-6181489 |
| P00450 | 2  | 19036966;1707599                                                                                                                                                                                                                                                                                                                                                                                                                                                                                                              |
| P00451 | 9  | 19833891;12472582;1909830;1732890;3149480;3925930;0813814;0709400;391901                                                                                                                                                                                                                                                                                                                                                                                                                                                      |
| P00488 | 2  | 7964707;1514887                                                                                                                                                                                                                                                                                                                                                                                                                                                                                                               |
| P00533 | 17 | 23738398;23391390;22803081;22824323;22078701;22016331;21402118;20809112;20734425;20709162;19176818;18442870;17907381;17567803;22824323;23752508-23007338                                                                                                                                                                                                                                                                                                                                                                      |
| P00734 | 26 | 25832738;23047384;22057947;19833891;19247833;18333131;18344894;13084771;15320513;15307903;14691582;12472582;11186232;11168298;10744154;10329979;9454848;9238054;9076865;8552614;7964707;8259328;1290164;6712454;4427781-9076865                                                                                                                                                                                                                                                                                               |
| P00738 | 1  | 1707599                                                                                                                                                                                                                                                                                                                                                                                                                                                                                                                       |
| P00740 | 1  | 11554943                                                                                                                                                                                                                                                                                                                                                                                                                                                                                                                      |
| P00742 | 2  | 14691582;9454848                                                                                                                                                                                                                                                                                                                                                                                                                                                                                                              |
| P00747 | 9  | 22079561;22016526;18000864;16629625;12614587;7690062;1514887;21573723;19651246                                                                                                                                                                                                                                                                                                                                                                                                                                                |
| P00748 | 2  | 7964707;3925930                                                                                                                                                                                                                                                                                                                                                                                                                                                                                                               |
| P00749 | 6  | 21573723;19651246;18612314;2046844;21573723;19651246                                                                                                                                                                                                                                                                                                                                                                                                                                                                          |
| P00750 | 22 | 21573723;19651246;22079561;22037947;22016526;21573723;19651246;19443933;19152029;18042398;18000864;16917839;16139333;12614587;12166004;9076865;7616284;7690062;1903560;2508383;21573723;19651246                                                                                                                                                                                                                                                                                                                              |
| P00751 | 2  | 20952585;15684772                                                                                                                                                                                                                                                                                                                                                                                                                                                                                                             |
| P00797 | 8  | 21850517;9232358;8779866;7840317;8379845;2989637;7021043;7204569                                                                                                                                                                                                                                                                                                                                                                                                                                                              |
| P00813 | 3  | 20456005;15610928;11320597                                                                                                                                                                                                                                                                                                                                                                                                                                                                                                    |
| P01008 | 8  | 9076865;15792522;15684771;15094537;14691582;9076865;3675178;3924003                                                                                                                                                                                                                                                                                                                                                                                                                                                           |
| P01009 | 1  | 7690062                                                                                                                                                                                                                                                                                                                                                                                                                                                                                                                       |
| P01019 | 8  | 21510818;20577118;18712059;7576312;2969340;3819838;2455198;7299410                                                                                                                                                                                                                                                                                                                                                                                                                                                            |
| P01023 | 4  | 23867460;7690062;2430066;6206205                                                                                                                                                                                                                                                                                                                                                                                                                                                                                              |
| P01024 | 4  | 23033813;20800648;16936276;16936276                                                                                                                                                                                                                                                                                                                                                                                                                                                                                           |
| P01031 | 5  | 23855891;23033813;20085927;20952585;18578885                                                                                                                                                                                                                                                                                                                                                                                                                                                                                  |
| P01033 | 6  | 21287269;19780197;16344894;12098653;11095516;10716770                                                                                                                                                                                                                                                                                                                                                                                                                                                                         |
| P01034 | 4  | 22547045;16154555;12880536;12235535                                                                                                                                                                                                                                                                                                                                                                                                                                                                                           |
| P01042 | 10 | 18951883;18255230;15331040;12941374;12706237;11516566;7964707;1588616;1861161;3925930                                                                                                                                                                                                                                                                                                                                                                                                                                         |

|        |     |                                                                                                                                                                                                                                                                                                                                                                                                                                                                                                                                                                                                                                                                                                                                                                                                                                                                                                                                                                                                                                                                                                                                                                                                                                                                                                                                                                                                                                                                                                                            |
|--------|-----|----------------------------------------------------------------------------------------------------------------------------------------------------------------------------------------------------------------------------------------------------------------------------------------------------------------------------------------------------------------------------------------------------------------------------------------------------------------------------------------------------------------------------------------------------------------------------------------------------------------------------------------------------------------------------------------------------------------------------------------------------------------------------------------------------------------------------------------------------------------------------------------------------------------------------------------------------------------------------------------------------------------------------------------------------------------------------------------------------------------------------------------------------------------------------------------------------------------------------------------------------------------------------------------------------------------------------------------------------------------------------------------------------------------------------------------------------------------------------------------------------------------------------|
| P01100 | 47  | 23022460;22211901;21792724;21430166;21376061;20599980;20528165;20497419;19940184;19161992;18849175;18632941;18581599;18524486;18512692;17881483;17767492;17584182;17531342;17201484;17161529;16671479;16626634;16360182;16198697;15476702;14694501;12144050;11906794;11597598;11532430;11450029;11438395;11421586;11331375;11150324;10896894;10775883;10757326;10642858;10461813;10188945;9272824;9221952;10921077;7702707;8152541                                                                                                                                                                                                                                                                                                                                                                                                                                                                                                                                                                                                                                                                                                                                                                                                                                                                                                                                                                                                                                                                                         |
| P01106 | 3   | 21949375;20030221;12666113                                                                                                                                                                                                                                                                                                                                                                                                                                                                                                                                                                                                                                                                                                                                                                                                                                                                                                                                                                                                                                                                                                                                                                                                                                                                                                                                                                                                                                                                                                 |
| P01112 | 1   | 21510818                                                                                                                                                                                                                                                                                                                                                                                                                                                                                                                                                                                                                                                                                                                                                                                                                                                                                                                                                                                                                                                                                                                                                                                                                                                                                                                                                                                                                                                                                                                   |
| P01116 | 10  | 23602967;20816819;19176818;18219571;16460709;15880494;15229242;21510818;15668227;22865681                                                                                                                                                                                                                                                                                                                                                                                                                                                                                                                                                                                                                                                                                                                                                                                                                                                                                                                                                                                                                                                                                                                                                                                                                                                                                                                                                                                                                                  |
| P01127 | 18  | 22023610;20860549;19236168;7657809;7657809;22407783;22236767;21568693;20819515;19818206;19383401;17597120;14534257;10329979;9618703;8963994;7657809;8091423                                                                                                                                                                                                                                                                                                                                                                                                                                                                                                                                                                                                                                                                                                                                                                                                                                                                                                                                                                                                                                                                                                                                                                                                                                                                                                                                                                |
| P01130 | 1   | 23867460                                                                                                                                                                                                                                                                                                                                                                                                                                                                                                                                                                                                                                                                                                                                                                                                                                                                                                                                                                                                                                                                                                                                                                                                                                                                                                                                                                                                                                                                                                                   |
| P01133 | 22  | 22865681;22629425;22525836;22407783;22236767;22085254;22078761;21402118;20130176;19442692;19176818;18191945;17618992;17610915;17294724;17108169;15899248;12557207;11893024;10960593;10511239;8091423                                                                                                                                                                                                                                                                                                                                                                                                                                                                                                                                                                                                                                                                                                                                                                                                                                                                                                                                                                                                                                                                                                                                                                                                                                                                                                                       |
| P01135 | 2   | 18647603;17207742                                                                                                                                                                                                                                                                                                                                                                                                                                                                                                                                                                                                                                                                                                                                                                                                                                                                                                                                                                                                                                                                                                                                                                                                                                                                                                                                                                                                                                                                                                          |
| P01137 | 55  | 23884949;23727390;23064509;22085254;21787762;21294159;21273111;20946170;20860549;20645410;19744530;19719963;19625042;19342245;18428026;18191945;18040277;16498024;16038877;15380482;15145083;14760011;14552879;12127673;10785461;9682014;9417823;8834102;8742129;8091423;23727390;23562792;22079829;22016551;21787762;21760535;21273450;20623539;19719963;19342245;18581269;18293403;18221366;17611274;16498024;15380482;15145083;14637102;14552879;12127673;12056841;8963994;8834102;7846578;8091423                                                                                                                                                                                                                                                                                                                                                                                                                                                                                                                                                                                                                                                                                                                                                                                                                                                                                                                                                                                                                      |
| P01138 | 171 | 24490534;23792206;23791854;23303920;22878912;22745769;22723636;22573254;22220508;22137336;22116043;22085254;21819712;21733076;21620945;21411654;21209491;21049601;20668234;20419536;20334467;20167291;20144886;20029964;19812967;19784741;19476208;22009833;19337830;19286942;19170182;18990142;18695504;18602914;18585435;18512692;18484898;18077567;17936749;17634369;17599430;17522325;17459471;17405147;17392476;17387687;17335812;17055159;16909619;16860320;16850748;16631308;16540569;16470209;16198706;16198705;15649491;15639807;15522871;15236239;15191808;15128857;14665959;14561854;12895449;12820682;12781986;12542855;12499054;12435430;12408842;12394773;12162901;12115695;12115676;12039665;12034080;12034073;12009779;11606629;11585248;11550223;11331375;11358454;11286165;11241740;11186234;11060810;10757326;10683293;10646525;10495438;10460247;10369555;10212315;10208566;9867998;9670992;9671662;9669765;9651218;9588600;9486767;9417824;9391013;9344570;9171168;9165951;9867940;9603065;8930993;8963994;8762435;8787152;8566208;8762551;8594213;7555254;8914793;7841375;8015371;8114912;7505409;8457890;8457883;1333605;1313859;1664273;1933308;2177175;1690226;3437471;3858886;6525501;6502217;23303920;23360280;23124646;23098734;21430166;21421025;20819171;20600315;20554000;20171177;19118106;18095482;17686909;17584113;16629625;16305315;14699980;12589927;12440384;12440372;12440358;11923434;10811391;10384258;9932426;9369296;9199395;8993706;15901762;15748877;15144859;15032708;107635 |
| P01148 | 5   | 22480691;7531902;8487676;1700405;395062                                                                                                                                                                                                                                                                                                                                                                                                                                                                                                                                                                                                                                                                                                                                                                                                                                                                                                                                                                                                                                                                                                                                                                                                                                                                                                                                                                                                                                                                                    |
| P01160 | 1   | 1598176                                                                                                                                                                                                                                                                                                                                                                                                                                                                                                                                                                                                                                                                                                                                                                                                                                                                                                                                                                                                                                                                                                                                                                                                                                                                                                                                                                                                                                                                                                                    |

|        |    |                                                                                                                                                                                                                                                                                  |
|--------|----|----------------------------------------------------------------------------------------------------------------------------------------------------------------------------------------------------------------------------------------------------------------------------------|
| P01178 | 5  | 19648936;15954070;15662938;9845225;7576312                                                                                                                                                                                                                                       |
| P01185 | 16 | 21850517;17168344;17021585;11507005;10369169;10341867;9161360;8927412;<br>7753575;7840317;7869058;8379845;2258733;3954565;6587004;7204569                                                                                                                                        |
| P01189 | 26 | 21050590;20709555;19289522;17028956;10290909;15549750;15110005;122158<br>92;10914354;10640453;10453760;10391370;10225218;9226335;8971834;896260<br>1;8835031;8988397;8762550;8216840;1466870;1640843;1331272;6410971;6293<br>405;4222244                                         |
| P01210 | 7  | 17767492;15952166;11440816;11166985;10924963;8361583;2460195                                                                                                                                                                                                                     |
| P01213 | 31 | 22748825;20675200;18835424;17881483;17698296;16671477;16144654;155743<br>63;12373547;11440816;11438395;11166985;10924963;9674552;8758278;876255<br>0;8552782;7702707;7909561;1356430;1359484;1640843;1627280;1980130;1967<br>925;2460195;3106200;2884046;2860844;2860614;6657511 |
| P01222 | 4  | 17494102;1635789;6619835;7112391                                                                                                                                                                                                                                                 |
| P01225 | 19 | 19474795;17494102;17298549;16088035;12830973;10952914;10067862;955801<br>0;9537294;8637446;7666783;7559145;8254785;8487676;1466870;3544454;6774<br>694;395062;971771                                                                                                             |
| P01229 | 16 | 19474795;17494102;17298549;9558010;9537294;8637446;7557841;7559145;825<br>4785;8487676;1466870;3544454;3933451;6774694;395062;971771                                                                                                                                             |
| P01233 | 8  | 12399442;11186912;10921230;8988397;2318574;395062;433028;971771                                                                                                                                                                                                                  |
| P01236 | 14 | 19474795;18440711;17494102;17298549;10418843;10341867;8637446;8963972;<br>8988397;8487676;2510463;3933451;3842372;6819900                                                                                                                                                        |
| P01241 | 30 | 21062296;20444938;18092562;17376000;15058792;12519883;12373543;121241<br>84;11026507;11010069;10052669;8988397;8532215;7666783;7557841;7658599;<br>8175969;8005564;7965141;8427299;1466870;1635789;6293405;7347279;288855<br>;838851;4719665;18092562;16554457;8427299           |
| P01258 | 2  | 21243003;3931063                                                                                                                                                                                                                                                                 |
| P01270 | 13 | 23558091;22710945;21632079;17457452;17376000;16217589;12145766;948237<br>6;9427170;9228870;8786732;838851;3931063                                                                                                                                                                |
| P01275 | 4  | 16112402;12519883;3039255;1254731                                                                                                                                                                                                                                                |
| P01282 | 10 | 22781650;18677446;18556138;11045565;10804204;7576312;3193505;3656550;2<br>426476;3516303                                                                                                                                                                                         |
| P01286 | 1  | 7666783                                                                                                                                                                                                                                                                          |
| P01303 | 12 | 22781650;18581269;16430653;15596391;14628554;11723173;11045565;103938<br>80;9153661;7620299;7576312;3656550                                                                                                                                                                      |
| P01308 | 1  | 4719665                                                                                                                                                                                                                                                                          |
| P01344 | 3  | 22773197;11078681;9762866                                                                                                                                                                                                                                                        |
| P01350 | 4  | 3363465;3460562;6381185;4856812                                                                                                                                                                                                                                                  |

|        |     |                                                                                                                                                                                                                                                                                                                                                                                                                                                                                                                                                                                                                                                                                                                                                                                                                                                                                                                                                                                                                                                                                                                                                                                                                                                                                                                                                                                                                                                                                                                                                                                                                                                                                                                                           |
|--------|-----|-------------------------------------------------------------------------------------------------------------------------------------------------------------------------------------------------------------------------------------------------------------------------------------------------------------------------------------------------------------------------------------------------------------------------------------------------------------------------------------------------------------------------------------------------------------------------------------------------------------------------------------------------------------------------------------------------------------------------------------------------------------------------------------------------------------------------------------------------------------------------------------------------------------------------------------------------------------------------------------------------------------------------------------------------------------------------------------------------------------------------------------------------------------------------------------------------------------------------------------------------------------------------------------------------------------------------------------------------------------------------------------------------------------------------------------------------------------------------------------------------------------------------------------------------------------------------------------------------------------------------------------------------------------------------------------------------------------------------------------------|
| P01375 | 187 | 23979726;23956505;23926264;23758598;23731227;23603407;23492769;23403365;23313320;23143993;23001399;22986158;22981449;22975435;22878925;22865690;22840733;22825006;22749984;22748825;22745823;22733360;22613732;22526707;22420033;22409448;22406975;22404382;22342994;22233298;22189457;22125095;22072681;21922518;21806470;21806469;21787762;21760535;21656712;21604270;21396163;21309692;21287269;21251802;21250919;21224756;21208533;21185611;21176673;21167907;21111721;20970752;20947810;20862369;20823594;20817464;20800648;20799028;20736048;20708606;20646530;20633123;20630763;20623539;20385073;20382225;20350367;20334467;20309734;20304963;20203181;20195207;20107429;20047904;19949368;19780197;19543752;19519665;19469692;19439611;19373550;19320007;19306380;19183262;19090911;18971481;18849175;18838947;18751914;18635178;18628687;18511041;18468795;18440605;18440241;18322000;18298463;18197140;17945432;17881483;17704735;17645692;17621255;17601981;17494103;17443214;17416966;17392476;17301687;17184185;17111361;17046032;16918386;16825529;16638021;16634039;16303916;16263098;16253423;16187294;16083358;16054120;16019083;15899263;15855648;15851082;15843065;15744602;15684771;15684769;15668227;15610171;15605375;15477364;15320513;15307904;15229242;15135227;15105666;15004554;14760011;14753477;14691582;14662726;14593216;14588118;14552870;14512160;13678663;12675974;12675973;12664616;12507778;12440358;12167759;12165135;12127673;12111861;11935370;11886441;11517251;11516566;11493024;11476601;11393259;11393256;11200245;11208917;11031095;10822448;10821736;10804204;10757326;10744154;10547095;10531440;10212323;9799824;9729336;9682014;9454848;9486767;9270046;9262171;8823387;7702707;17217414 |
| P01574 | 4   | 23344866;20109445;19196180;17426631                                                                                                                                                                                                                                                                                                                                                                                                                                                                                                                                                                                                                                                                                                                                                                                                                                                                                                                                                                                                                                                                                                                                                                                                                                                                                                                                                                                                                                                                                                                                                                                                                                                                                                       |
| P01579 | 12  | 23828573;23731227;23257628;22348141;21656712;20925481;20832407;15537875;15229242;14760011;14563689;11990353                                                                                                                                                                                                                                                                                                                                                                                                                                                                                                                                                                                                                                                                                                                                                                                                                                                                                                                                                                                                                                                                                                                                                                                                                                                                                                                                                                                                                                                                                                                                                                                                                               |
| P01583 | 5   | 22655536;22459192;22420033;9886082;10369555                                                                                                                                                                                                                                                                                                                                                                                                                                                                                                                                                                                                                                                                                                                                                                                                                                                                                                                                                                                                                                                                                                                                                                                                                                                                                                                                                                                                                                                                                                                                                                                                                                                                                               |
| P01584 | 108 | 17217414;10369555;23731227;23603407;23403365;23317037;23001399;22986158;22981449;22975435;22865690;22840733;22733360;22655536;22483094;22420033;22406975;22404382;22378878;22342994;22125095;22072681;21922518;21806470;21396163;21383505;21298060;21287269;21208533;21185611;21167907;21111721;20974246;20823594;20799028;20736048;20630763;20623539;20382225;20334467;20309734;20107429;20005255;19543752;19519665;19457130;19373550;19320007;19183262;18838947;18675261;18674548;18577426;18511041;18367607;18316064;18194440;17945432;17918744;17917587;17704735;17600517;17494103;17443214;17403033;17392476;17356380;17188663;17167171;17111361;16825529;16456668;16345062;16307587;16253423;16187294;16041804;16038625;16019083;15855648;15840993;15689362;15605375;15477364;15335103;15307904;15229242;15105666;14760011;14512160;13678663;12664616;12482119;12399442;12124194;12111861;11990353;11924887;11771937;11565605;11200253;11170729;10821736;9886082;9682014;9262171;9221936;8426182                                                                                                                                                                                                                                                                                                                                                                                                                                                                                                                                                                                                                                                                                                                                    |
| P01588 | 53  | 23098731;22659566;22196867;22145921;22052241;22038355;22011644;21707531;21192293;21167907;21056627;20146558;20082560;20010384;19719963;19383246;19110203;19030901;18991489;18635178;18625498;18616414;18552697;18313052;18309506;18065151;17936749;17614942;17543134;17305256;17236773;17178192;17141961;17023852;16824697;16629619;16619678;16547753;16477096;16260722;15993112;15792521;15509883;15456912;15247477;12920606;12533271;12152030;12082184;11854521;8420523;2297306;6742994                                                                                                                                                                                                                                                                                                                                                                                                                                                                                                                                                                                                                                                                                                                                                                                                                                                                                                                                                                                                                                                                                                                                                                                                                                                 |

|               |    |                                                                                                                                                                                                                                                                                                                                                                                                                                                                                                                                                                                                                                                                       |
|---------------|----|-----------------------------------------------------------------------------------------------------------------------------------------------------------------------------------------------------------------------------------------------------------------------------------------------------------------------------------------------------------------------------------------------------------------------------------------------------------------------------------------------------------------------------------------------------------------------------------------------------------------------------------------------------------------------|
| P01589        | 3  | 9014956;8164533;1331272                                                                                                                                                                                                                                                                                                                                                                                                                                                                                                                                                                                                                                               |
| P01857        | 11 | 21298060;665057;20401845;19200733;17905632;11393129;9576257;8259905;6719908;6505487;971771                                                                                                                                                                                                                                                                                                                                                                                                                                                                                                                                                                            |
| P01859        | 11 | 21298060;665057;20401845;19200733;17905632;11393129;9576257;8259905;6719908;6505487;971771                                                                                                                                                                                                                                                                                                                                                                                                                                                                                                                                                                            |
| P01876        | 3  | 10889567;6505487;971771                                                                                                                                                                                                                                                                                                                                                                                                                                                                                                                                                                                                                                               |
| P01877        | 3  | 10889567;6505487;971771                                                                                                                                                                                                                                                                                                                                                                                                                                                                                                                                                                                                                                               |
| P02144        | 3  | 22773196;21181573;10084442                                                                                                                                                                                                                                                                                                                                                                                                                                                                                                                                                                                                                                            |
| P02452        | 6  | 23516080;22576416;12794745;12145766;11771937;6248997                                                                                                                                                                                                                                                                                                                                                                                                                                                                                                                                                                                                                  |
| P02458        | 1  | 23027386                                                                                                                                                                                                                                                                                                                                                                                                                                                                                                                                                                                                                                                              |
| P02462        | 1  | 23027386                                                                                                                                                                                                                                                                                                                                                                                                                                                                                                                                                                                                                                                              |
| P02511        | 1  | 23077034                                                                                                                                                                                                                                                                                                                                                                                                                                                                                                                                                                                                                                                              |
| P02649        | 7  | 21132529;18751914;18581664;18317192;16091415;15073526;12526030                                                                                                                                                                                                                                                                                                                                                                                                                                                                                                                                                                                                        |
| P02671        | 24 | 1290164;23852558;22037947;17274489;12677772;12614584;10412796;7964707;8259328;1290164;1514887;1522997;1707599;2508383;3262334;3299130;3104622;3748594;2992116;4009754;3890800;853549;934690;9418975                                                                                                                                                                                                                                                                                                                                                                                                                                                                   |
| P02675        | 23 | 23852558;22037947;17274489;12677772;12614584;10412796;7964707;8259328;1290164;1514887;1522997;1707599;2508383;3262334;3299130;3104622;3748594;2992116;4009754;3890800;853549;934690;9418975                                                                                                                                                                                                                                                                                                                                                                                                                                                                           |
| P02679        | 1  | 9418975                                                                                                                                                                                                                                                                                                                                                                                                                                                                                                                                                                                                                                                               |
| P02686        | 73 | 23832758;23376368;22805224;22500090;22463720;22407783;22173726;22057439;22028197;21996274;21970342;21656231;21638341;21416627;20709122;20381564;20184788;19182380;19152029;19053058;18625299;18578635;18449589;17439350;17376002;17047682;16957585;16632872;16626970;16571744;16503802;16502219;16049170;16047549;16014718;15920160;15182305;15084655;14993064;14753480;14753473;14705147;14599661;14534158;14507981;12614587;12440382;12241646;11923434;11853017;11746773;11565606;11550218;11518733;11398181;11356861;11226756;11146478;10964948;10739580;10547103;10430053;9786985;9651218;9633812;9479054;9294414;7490015;7541476;8442406;1384082;3328836;2425054 |
| P02741        | 21 | 23188848;22773196;22404382;19485254;19349048;19242618;18795484;18440241;18414426;18374004;18164328;15954057;15832900;15706560;15666138;15648796;12851776;9881738;8734896;2435822;414445                                                                                                                                                                                                                                                                                                                                                                                                                                                                               |
| P02745        | 1  | 19770513                                                                                                                                                                                                                                                                                                                                                                                                                                                                                                                                                                                                                                                              |
| P02745, P0274 | 3  | 19770513;19091977;15684772                                                                                                                                                                                                                                                                                                                                                                                                                                                                                                                                                                                                                                            |
| P02746        | 3  | 19770513;22884909;16345062                                                                                                                                                                                                                                                                                                                                                                                                                                                                                                                                                                                                                                            |
| P02747        | 1  | 19770513                                                                                                                                                                                                                                                                                                                                                                                                                                                                                                                                                                                                                                                              |
| P02748        | 2  | 20952585;18578885                                                                                                                                                                                                                                                                                                                                                                                                                                                                                                                                                                                                                                                     |
| P02751        | 43 | 23320533;23289019;22022865;21396163;20645410;20606643;20347014;20206381;20167291;20053907;19144400;18373484;19845152;18083223;17597120;17439350;17438016;17314203;16500703;16287096;16237323;16102813;15665610;15592854;15530871;15341588;15145083;14962555;12895449;12794745;12526031;12099279;11890721;11755791;11358439;11352090;11179852;10412796;9417833;8834102;7964707;1514887;1471470                                                                                                                                                                                                                                                                         |
| P02766        | 1  | 20141154                                                                                                                                                                                                                                                                                                                                                                                                                                                                                                                                                                                                                                                              |



|        |    |                                                                                                                                                                                                                                                                                                                                                                                                                                                                                                                                  |
|--------|----|----------------------------------------------------------------------------------------------------------------------------------------------------------------------------------------------------------------------------------------------------------------------------------------------------------------------------------------------------------------------------------------------------------------------------------------------------------------------------------------------------------------------------------|
| P02768 | 61 | 25253062;22046257;20401845;19349048;18774604;18627257;18617007;18187233;18077574;17711402;17402855;17387687;17236773;16806707;16671481;16550325;16179548;14753476;12920606;12507778;12149929;11935370;11476601;11050127;10914354;10640453;10412796;10213646;9292692;9270046;9261780;9403253;8786732;7741615;8413879;8371938;8366340;1471470;1984104;2297306;2818825;2930340;3346710;2439939;3104553;3668609;2430066;3525758;3698435;4056823;4068264;6526525;6206205;6411046;7139775;7136499;7130992;6165810;4901-1113150-5083939 |
| P02775 | 1  | 1290164                                                                                                                                                                                                                                                                                                                                                                                                                                                                                                                          |
| P02776 | 1  | 1290164                                                                                                                                                                                                                                                                                                                                                                                                                                                                                                                          |
| P02778 | 7  | 21294159;20478301;17907930;16862543;15998793;15352216;14637115                                                                                                                                                                                                                                                                                                                                                                                                                                                                   |
| P02787 | 8  | 12093138;10952914;10067862;10026110;7541476;7559145;2297306;2930340                                                                                                                                                                                                                                                                                                                                                                                                                                                              |
| P02790 | 1  | 23867460                                                                                                                                                                                                                                                                                                                                                                                                                                                                                                                         |
| P02794 | 5  | 19958190;12093138;8978469;8428551;6886688                                                                                                                                                                                                                                                                                                                                                                                                                                                                                        |
| P02795 | 5  | 22405890;19828842;19159657;17218363;15592854                                                                                                                                                                                                                                                                                                                                                                                                                                                                                     |
| P02818 | 14 | 23516080;22576416;22218778;21632079;18482879;17340221;16770357;14722626;12145766;9773450;9467550;8830990;7878394;1558739                                                                                                                                                                                                                                                                                                                                                                                                         |
| P03372 | 16 | 25142059;22975889;21275111;17704735;12115072;10952914;10026954;10007662;10026110;9362426;9203052;22700771;20456002;20350367;17704735;16902906                                                                                                                                                                                                                                                                                                                                                                                    |
| P03951 | 2  | 7964707;3925930                                                                                                                                                                                                                                                                                                                                                                                                                                                                                                                  |
| P03956 | 1  | 11150324                                                                                                                                                                                                                                                                                                                                                                                                                                                                                                                         |
| P03973 | 2  | 20047904;17218363                                                                                                                                                                                                                                                                                                                                                                                                                                                                                                                |
| P04035 | 1  | 22537532                                                                                                                                                                                                                                                                                                                                                                                                                                                                                                                         |
| P04040 | 16 | 19828842;19563509;19119913;18635178;16634331;16018585;15036352;14644473;12213642;11011974;9726263;9313901;8973665;7701506;2358556;2295968                                                                                                                                                                                                                                                                                                                                                                                        |
| P04054 | 1  | 19306380                                                                                                                                                                                                                                                                                                                                                                                                                                                                                                                         |
| P04070 | 10 | 16708170;15320513;15307903;11586111;11175376;10903607;10744154;9454848;9076865;3675178                                                                                                                                                                                                                                                                                                                                                                                                                                           |
| P04085 | 17 | 25405460;22085254;16426020;7057609;22407785;22250707;21508095;20819515;19818206;19383401;17597120;14534257;10329979;9618703;8963994;76578098001422                                                                                                                                                                                                                                                                                                                                                                               |
| P04141 | 11 | 23101949;22011644;20478301;19428687;19033079;17464087;17331604;16626091;15998231;15658127;15456912                                                                                                                                                                                                                                                                                                                                                                                                                               |
| P04150 | 12 | 19545280;19416634;19228956;18354017;16256102;14552870;11150324;10531440;7473799;8503522;1613805;1588607                                                                                                                                                                                                                                                                                                                                                                                                                          |
| P04156 | 1  | 20418657                                                                                                                                                                                                                                                                                                                                                                                                                                                                                                                         |
| P04179 | 7  | 21187959;19828842;16095570;15684769;14767765;12482119;10428065                                                                                                                                                                                                                                                                                                                                                                                                                                                                   |
| P04234 | 7  | 23313320;22629434;21249281;18790013;18666440;18438914;17432962                                                                                                                                                                                                                                                                                                                                                                                                                                                                   |
| P04271 | 40 | 25419261;22996688;22220508;21704617;21630007;21609310;21535942;20437933;20370565;20304889;20083105;20038240;19499171;19382871;19350385;19309047;19191513;19183262;18484102;18482974;18374350;18343116;18313337;17244329;16528168;16219025;16211443;16190875;15670387;15182944;15118880;15080887;14962555;14699277;11878171;9669763;10975736;8668354;8354567;1805117                                                                                                                                                              |
| P04275 | 6  | 22425718;7964707;1290164;1732896;1803505;2508383                                                                                                                                                                                                                                                                                                                                                                                                                                                                                 |
| P04278 | 2  | 20839151;17494102                                                                                                                                                                                                                                                                                                                                                                                                                                                                                                                |
| P04406 | 5  | 21930674;20141154;17460353;15857397;9344569                                                                                                                                                                                                                                                                                                                                                                                                                                                                                      |
| P04553 | 4  | 12721213;10826266;7537955;7559145                                                                                                                                                                                                                                                                                                                                                                                                                                                                                                |
| P04626 | 3  | 23758598;20734425;15514921                                                                                                                                                                                                                                                                                                                                                                                                                                                                                                       |

|        |    |                                                                                                                                                                                                                                                                                                                                                                                                                                                                                                                                                                                                                                                                                                                                                                                   |
|--------|----|-----------------------------------------------------------------------------------------------------------------------------------------------------------------------------------------------------------------------------------------------------------------------------------------------------------------------------------------------------------------------------------------------------------------------------------------------------------------------------------------------------------------------------------------------------------------------------------------------------------------------------------------------------------------------------------------------------------------------------------------------------------------------------------|
| P04628 | 12 | 24090150;23456240;23320533;23251385;22947224;22575440;22073235;22006831;19473059;18701700;21273111;19473059                                                                                                                                                                                                                                                                                                                                                                                                                                                                                                                                                                                                                                                                       |
| P04629 | 26 | 23807400;23850430;23809594;23792206;23174180;21903010;21620943;21421025;20171177;20144886;19545610;18585435;18305238;15611995;12542855;12115676;11223160;11161589;11060810;10993692;9671662;9669765;9391013;8594212;8015271;1222605                                                                                                                                                                                                                                                                                                                                                                                                                                                                                                                                               |
| P04637 | 11 | 23035104;22427977;21748659;20210855;17331604;12657369;11810634;11208917;10709875;5492504;23055316                                                                                                                                                                                                                                                                                                                                                                                                                                                                                                                                                                                                                                                                                 |
| P04731 | 2  | 17218363;15592854                                                                                                                                                                                                                                                                                                                                                                                                                                                                                                                                                                                                                                                                                                                                                                 |
| P04733 | 1  | 17218363                                                                                                                                                                                                                                                                                                                                                                                                                                                                                                                                                                                                                                                                                                                                                                          |
| P04792 | 9  | 22917619;21655070;21132399;20350367;19489718;15073526;14694501;22409448;22244304                                                                                                                                                                                                                                                                                                                                                                                                                                                                                                                                                                                                                                                                                                  |
| P04839 | 5  | 22150233;21355819;19056384;18926823;17071951                                                                                                                                                                                                                                                                                                                                                                                                                                                                                                                                                                                                                                                                                                                                      |
| P05019 | 46 | 18092562;16554457;8427299;23941795;22773197;22218778;22085254;21062296;20970752;20925481;20213470;19812967;19533653;19214561;18938163;18581269;18440711;18092562;18077567;17233289;16554457;16519668;16215319;16179548;16038877;15779090;15073526;14753473;12801087;12187277;11450028;11078681;11026506;10923678;10486180;9871451;9762866;9416300;7666783;7557841;7541476;8175969;8005564;22773197;11078681;9762866                                                                                                                                                                                                                                                                                                                                                               |
| P05023 | 1  | 22275761                                                                                                                                                                                                                                                                                                                                                                                                                                                                                                                                                                                                                                                                                                                                                                          |
| P05067 | 19 | 23617630;22805224;22514792;21824499;21620594;20698757;19932144;18627258;18561916;17614942;16325784;12866814;11578629;11311801;10806498;9650755;9350423;8811125;7473801                                                                                                                                                                                                                                                                                                                                                                                                                                                                                                                                                                                                            |
| P05089 | 9  | 22629434;22504113;22325098;22233298;21411654;19293775;18358516;17720160;17418108                                                                                                                                                                                                                                                                                                                                                                                                                                                                                                                                                                                                                                                                                                  |
| P05107 | 12 | 11890721;10914354;22150233;22044160;21784069;21145887;19250688;15992367;15659600;15312174;15102919;15009633                                                                                                                                                                                                                                                                                                                                                                                                                                                                                                                                                                                                                                                                       |
| P05112 | 8  | 23237028;22348141;22252298;21411054;20025559;14700011;12105155;10309555                                                                                                                                                                                                                                                                                                                                                                                                                                                                                                                                                                                                                                                                                                           |
| P05121 | 3  | 12472582;9076865;7690062                                                                                                                                                                                                                                                                                                                                                                                                                                                                                                                                                                                                                                                                                                                                                          |
| P05129 | 13 | 21443453;20675200;20070863;19109493;19059398;18835424;18307037;17586495;17131417;15099403;10860578;10700012;10069504                                                                                                                                                                                                                                                                                                                                                                                                                                                                                                                                                                                                                                                              |
| P05155 | 1  | 18593519                                                                                                                                                                                                                                                                                                                                                                                                                                                                                                                                                                                                                                                                                                                                                                          |
| P05164 | 85 | 23731227;23603407;22986158;22655536;22395142;22322369;22289688;22150233;22044160;21787762;21784069;21496122;21355819;21259324;21138398;21134362;21111721;20970752;20801040;20799028;20623539;20350367;20176685;20107429;19891733;19831872;19418318;19373550;19295488;19200733;19056384;19038604;19000748;18948848;18926823;18666440;18628687;18384773;18197140;18180375;17945432;17917587;17704735;17664140;17645692;17621255;17608147;17484972;17418876;17304106;17294055;17236773;17184185;17161287;17071951;16918386;16601144;16581192;16432531;16303916;15899263;15792522;15725342;15610928;15452194;15312174;15033786;15009633;14691582;12951232;12675974;11553680;11020993;10776915;9675307;9582256;9219976;9171180;8915909;8627308;8903674;8281452;1335518;1649310;2166776 |
| P05186 | 50 | 23516080;21632079;21430166;20716462;18324828;18001205;16830131;16430372;16305315;16267833;15910779;15899260;15666138;15530870;14985870;14722626;14648541;14639555;12145766;11550223;10868785;9881730;9773450;9467550;9172248;8786732;8588079;8524605;8022633;7615177;1484734;1481247;1544955;1984104;2123534;2083875;2502349;2495875;2600593;3918147;6828228;6215609;6786254;6104224;215614;100499;831659;196527;811418;1090278                                                                                                                                                                                                                                                                                                                                                   |

|        |    |                                                                                                                                                                                                                                                                                                                                                                                                                                                                                                                                                                                                                                                                                                                                                              |
|--------|----|--------------------------------------------------------------------------------------------------------------------------------------------------------------------------------------------------------------------------------------------------------------------------------------------------------------------------------------------------------------------------------------------------------------------------------------------------------------------------------------------------------------------------------------------------------------------------------------------------------------------------------------------------------------------------------------------------------------------------------------------------------------|
| P05198 | 4  | 22815920;21933012;17885021;17578450                                                                                                                                                                                                                                                                                                                                                                                                                                                                                                                                                                                                                                                                                                                          |
| P05230 | 44 | 23562792;22975435;22124040;21663406;21557400;21486314;21411654;21096476;20488178;19738322;19141070;18482974;18312071;18291581;17717118;17418108;16823315;16487151;16099035;15804055;15247588;15055447;15036352;12427329;11939503;10833309;10380979;9749747;9486767;9417831;9418975;8662542;8594213;8015371;7682969;9418975;22649227;19955358;12557207;11320601;9418975;9192376;1588636;23979726                                                                                                                                                                                                                                                                                                                                                              |
| P05231 | 82 | 24042200;23731227;23727390;23639820;23399848;23143993;23001399;22878503;22715999;22578249;22504113;22420033;22406975;22404382;22369693;22333890;22233298;21922518;21788952;21760535;21617884;21604270;21294159;21167907;21134362;21092402;20823594;20736048;20623539;20478301;20382225;20304963;20038240;20029964;19831872;19543752;19519665;19257808;19138107;18511041;18446011;18440241;18390214;18316064;18088553;17720160;17704735;17600517;17597120;17494103;17392476;17167171;17111361;16417589;16345062;16184194;16129904;15954057;15851082;15840993;15477364;15128857;15105666;15048924;14760011;13678663;12442313;12111861;11924887;11723173;11453434;10821736;10757326;10712626;10369555;9799824;9682014;9262171;9014956;8571667;24042200;10712626 |
| P05305 | 15 | 20945816;19537925;18308116;17259328;17122448;16187216;15636718;12668144;11402584;9555032;8864490;9094380;7473800;17893916;12668144                                                                                                                                                                                                                                                                                                                                                                                                                                                                                                                                                                                                                           |
| P05362 | 14 | 22289688;21599492;17167171;16187294;16155637;15767230;11563627;11200253;10776916;10098961;10094148;9014956;8627308;8928610                                                                                                                                                                                                                                                                                                                                                                                                                                                                                                                                                                                                                                   |
| P05412 | 3  | 21671725;11150324;10343327                                                                                                                                                                                                                                                                                                                                                                                                                                                                                                                                                                                                                                                                                                                                   |
| P05413 | 3  | 23011062;22773196;22110655                                                                                                                                                                                                                                                                                                                                                                                                                                                                                                                                                                                                                                                                                                                                   |
| P05556 | 6  | 22150233;20213330;19929361;19038604;18926823;17161391                                                                                                                                                                                                                                                                                                                                                                                                                                                                                                                                                                                                                                                                                                        |
| P05937 | 2  | 15312785;12803980                                                                                                                                                                                                                                                                                                                                                                                                                                                                                                                                                                                                                                                                                                                                            |
| P05976 | 1  | 2293623                                                                                                                                                                                                                                                                                                                                                                                                                                                                                                                                                                                                                                                                                                                                                      |
| P06241 | 3  | 21167847;18680553;18680553                                                                                                                                                                                                                                                                                                                                                                                                                                                                                                                                                                                                                                                                                                                                   |
| P06276 | 1  | 12149929                                                                                                                                                                                                                                                                                                                                                                                                                                                                                                                                                                                                                                                                                                                                                     |
| P06307 | 10 | 20950355;19619609;14559369;12688385;11723173;11457525;10097004;7576312;7912821;7795551                                                                                                                                                                                                                                                                                                                                                                                                                                                                                                                                                                                                                                                                       |
| P06400 | 1  | 22510563                                                                                                                                                                                                                                                                                                                                                                                                                                                                                                                                                                                                                                                                                                                                                     |
| P06401 | 3  | 23542439;17618691;14622121                                                                                                                                                                                                                                                                                                                                                                                                                                                                                                                                                                                                                                                                                                                                   |
| P06493 | 4  | 23360302;22848730;19672039;22848730                                                                                                                                                                                                                                                                                                                                                                                                                                                                                                                                                                                                                                                                                                                          |
| P06731 | 6  | 23971371;7478727;1469474;1895117;2230428;7212647                                                                                                                                                                                                                                                                                                                                                                                                                                                                                                                                                                                                                                                                                                             |
| P06850 | 10 | 21492574;20470804;20458328;12399442;12114295;9558010;8988397;7576312;3925930;7133750                                                                                                                                                                                                                                                                                                                                                                                                                                                                                                                                                                                                                                                                         |
| P06858 | 1  | 3548963                                                                                                                                                                                                                                                                                                                                                                                                                                                                                                                                                                                                                                                                                                                                                      |
| P06870 | 2  | 24128681;24128681                                                                                                                                                                                                                                                                                                                                                                                                                                                                                                                                                                                                                                                                                                                                            |

|        |     |                                                                                                                                                                                                                                                                                                                                                                                                                                                                                                                                                                                                                                                                                                                                                                                                                                                                                                                                                                                                                                                                                                                                                                                                                                                                                  |
|--------|-----|----------------------------------------------------------------------------------------------------------------------------------------------------------------------------------------------------------------------------------------------------------------------------------------------------------------------------------------------------------------------------------------------------------------------------------------------------------------------------------------------------------------------------------------------------------------------------------------------------------------------------------------------------------------------------------------------------------------------------------------------------------------------------------------------------------------------------------------------------------------------------------------------------------------------------------------------------------------------------------------------------------------------------------------------------------------------------------------------------------------------------------------------------------------------------------------------------------------------------------------------------------------------------------|
| P06881 | 103 | 23413374;23068989;22829497;22140459;22041228;21939395;21806987;20970752;19817844;19660662;19372269;19247856;19235905;19146928;19059398;18973595;18712059;18338959;17885772;17577523;17339890;17314299;17046032;16860320;16839548;16540569;16099035;15998524;15929557;15890340;15804055;15755547;15715083;15680702;15652986;15233942;15082150;14552891;12895449;12402380;12125080;11738503;11686496;11476597;11398181;11168294;11161621;11045565;10714264;10460247;9670992;9486767;9417823;9344570;9344569;9116197;8974628;7576312;8201627;8405277;2682392;23867131;23068989;22655857;21939395;20970752;19660662;19372269;19247856;19235905;19146928;19059398;18824169;18712059;18338959;17719577;17577523;17540505;17503492;17331502;17314299;17046032;16839548;16540569;16305315;16099035;15665609;15082150;14637107;14637084;14552891;12811811;12402380;11168294;10960593;9486767;9344570;9116197;8875323;8201627;7795551;1667690;2682392                                                                                                                                                                                                                                                                                                                                      |
| P07101 | 21  | 23520469;23106570;21830219;20668234;20573032;17885772;16487151;15715083;15067714;12619082;11829345;11398181;11260912;10915581;10906754;9520225;7859097;1316056;6741741;6123957;839258                                                                                                                                                                                                                                                                                                                                                                                                                                                                                                                                                                                                                                                                                                                                                                                                                                                                                                                                                                                                                                                                                            |
| P07195 | 14  | 23793797;23647384;21529317;19998478;19485254;12852839;12509801;11417439;9362426;8145266;1984104;2718797;6526578;6822753                                                                                                                                                                                                                                                                                                                                                                                                                                                                                                                                                                                                                                                                                                                                                                                                                                                                                                                                                                                                                                                                                                                                                          |
| P07196 | 141 | 16902996;23316955;23123586;23036616;23031841;23026410;22878503;22865656;22805224;22551686;22480691;22315999;22270191;22220714;22052241;21630429;21618230;21559863;21490212;21470565;21384547;21361731;21303267;21157914;21092402;20805831;20155820;19783284;19456214;19409869;19382871;19191513;19158290;18772508;18647603;18634003;18571867;18561916;19845152;18086148;17879538;17540505;17432961;16633897;16586436;16527274;16379576;16190875;16176808;16102815;15929557;15755556;15715083;15707984;15665609;15253805;15207354;15197746;15102919;15051157;14966352;14577863;14534158;12895449;12811811;12614588;12614587;12503060;12427329;12410380;11939503;11920709;11880833;11854516;11829345;11746773;11578629;11476597;11462799;11104506;10931587;10837800;10818764;10759184;10737623;10714264;10683270;10668431;10452368;10366029;10221783;9827690;9786407;9682827;9670992;9668671;9650755;9633812;9570810;9460769;9292692;9285520;9106471;10975736;8985951;8811121;8668354;7753403;8426193;1333605;1618033;1473395;1724469;1700924;3276818;3336206;3328836;3104553;3105816;6539814;7170062;713490;23916821;22815926;21618230;19103176;18990118;18508036;16447750;16305315;15869942;15854260;15673843;11226756;10683270;10383635;8873865;1700924;2258947;3819017;6539814 |

|        |     |                                                                                                                                                                                                                                                                                                                                                                                                                                                                                                                                                                                                                                                                                                                                                                                                                                                                                                                                                                                                                                                                                                                                                                                                                                                                                                           |
|--------|-----|-----------------------------------------------------------------------------------------------------------------------------------------------------------------------------------------------------------------------------------------------------------------------------------------------------------------------------------------------------------------------------------------------------------------------------------------------------------------------------------------------------------------------------------------------------------------------------------------------------------------------------------------------------------------------------------------------------------------------------------------------------------------------------------------------------------------------------------------------------------------------------------------------------------------------------------------------------------------------------------------------------------------------------------------------------------------------------------------------------------------------------------------------------------------------------------------------------------------------------------------------------------------------------------------------------------|
| P07197 | 146 | 23316955;23123586;23036616;23031841;23026410;22878503;22865656;22805224;22551686;22480691;22315999;22270191;22220714;22052241;21630429;21618230;21559863;21490212;21470565;21384547;21361731;21303267;21157914;21092402;20805831;20155820;19783284;19456214;19409869;19382871;19191513;19158290;18772508;18647603;18634003;18571867;18561916;19845152;18086148;17879538;17540505;17432961;16633897;16586436;16527274;16379576;16190875;16176808;16102815;15929557;15755556;15715083;15707984;15665609;15253805;15207354;15197746;15102919;15051157;14966352;14577863;14534158;12895449;12811811;12614588;12614587;12503060;12427329;12410380;11939503;11920709;11880833;11854516;11829345;11746773;11578629;11476597;11462799;11104506;10931587;10837800;10818764;10759184;10737623;10714264;10683270;10668431;10452368;10366029;10221783;9827690;9786407;9682827;9670992;9668671;9650755;9633812;9570810;9460769;9292692;9285520;9106471;10975736;8985951;8811121;8668354;7753403;8426193;1333605;1618033;1473395;1724469;1700924;3276818;3336206;3328836;3104553;3105816;6539814;7170062;713490;23466931;21618230;21375803;19934591;18772508;16497507;23916821;22815926;21618230;19103176;18990118;18508036;16447750;16305315;15869942;15854260;15673843;11226756;10683270;10383635;8873865;1700924;225 |
| P07204 | 5   | 23562508;15320513;15307903;11425904;10744154                                                                                                                                                                                                                                                                                                                                                                                                                                                                                                                                                                                                                                                                                                                                                                                                                                                                                                                                                                                                                                                                                                                                                                                                                                                              |
| P07225 | 3   | 15320513;9076865;7965142                                                                                                                                                                                                                                                                                                                                                                                                                                                                                                                                                                                                                                                                                                                                                                                                                                                                                                                                                                                                                                                                                                                                                                                                                                                                                  |
| P07355 | 2   | 21430360;15248295                                                                                                                                                                                                                                                                                                                                                                                                                                                                                                                                                                                                                                                                                                                                                                                                                                                                                                                                                                                                                                                                                                                                                                                                                                                                                         |
| P07357 | 2   | 20952585;18578885                                                                                                                                                                                                                                                                                                                                                                                                                                                                                                                                                                                                                                                                                                                                                                                                                                                                                                                                                                                                                                                                                                                                                                                                                                                                                         |
| P07384 | 2   | 23102374;19376093                                                                                                                                                                                                                                                                                                                                                                                                                                                                                                                                                                                                                                                                                                                                                                                                                                                                                                                                                                                                                                                                                                                                                                                                                                                                                         |
| P07550 | 10  | 19545280;11293827;9362426;22723636;17933964;14503640;6135730;21903880;15211988;7620299                                                                                                                                                                                                                                                                                                                                                                                                                                                                                                                                                                                                                                                                                                                                                                                                                                                                                                                                                                                                                                                                                                                                                                                                                    |
| P07858 | 4   | 21373949;15817261;14720218;2425054                                                                                                                                                                                                                                                                                                                                                                                                                                                                                                                                                                                                                                                                                                                                                                                                                                                                                                                                                                                                                                                                                                                                                                                                                                                                        |
| P07949 | 6   | 21316153;16906542;16003691;14608602;10624807;906796                                                                                                                                                                                                                                                                                                                                                                                                                                                                                                                                                                                                                                                                                                                                                                                                                                                                                                                                                                                                                                                                                                                                                                                                                                                       |
| P07996 | 6   | 21168495;19780197;19719963;19342245;19278574;18612314                                                                                                                                                                                                                                                                                                                                                                                                                                                                                                                                                                                                                                                                                                                                                                                                                                                                                                                                                                                                                                                                                                                                                                                                                                                     |
| P08047 | 1   | 7615895                                                                                                                                                                                                                                                                                                                                                                                                                                                                                                                                                                                                                                                                                                                                                                                                                                                                                                                                                                                                                                                                                                                                                                                                                                                                                                   |
| P08069 | 23  | 22644570;21273111;20970752;19533653;18581269;18440711;18092562;18077567;17233289;16554457;16519668;15779090;12850828;12801087;12187277;11450028;11026506;10486180;9871451;9416300;7541476;8175969;8005564                                                                                                                                                                                                                                                                                                                                                                                                                                                                                                                                                                                                                                                                                                                                                                                                                                                                                                                                                                                                                                                                                                 |
| P08107 | 2   | 22409448;22244304                                                                                                                                                                                                                                                                                                                                                                                                                                                                                                                                                                                                                                                                                                                                                                                                                                                                                                                                                                                                                                                                                                                                                                                                                                                                                         |
| P08107 | 16  | 23145995;22840755;21787702;21459209;20599821;20550507;19257808;18577426;17454396;17359722;16156717;15634402;11723173;11085891;11074053;7753505                                                                                                                                                                                                                                                                                                                                                                                                                                                                                                                                                                                                                                                                                                                                                                                                                                                                                                                                                                                                                                                                                                                                                            |
| P08123 | 6   | 23516080;22576416;12794745;12145766;11771937;6248997                                                                                                                                                                                                                                                                                                                                                                                                                                                                                                                                                                                                                                                                                                                                                                                                                                                                                                                                                                                                                                                                                                                                                                                                                                                      |
| P08138 | 29  | 23303920;23856436;23809594;23792206;23303920;21786560;21110803;20468053;20144886;20083190;19788572;19429149;18585435;18581269;17706365;17634369;17234430;16631308;15530871;15031718;12860969;12408842;11311801;11223160;11063050;10384258;9671662;8457883;15031718                                                                                                                                                                                                                                                                                                                                                                                                                                                                                                                                                                                                                                                                                                                                                                                                                                                                                                                                                                                                                                        |
| P08151 | 2   | 21107202;12520472                                                                                                                                                                                                                                                                                                                                                                                                                                                                                                                                                                                                                                                                                                                                                                                                                                                                                                                                                                                                                                                                                                                                                                                                                                                                                         |
| P08172 | 1   | 22386753                                                                                                                                                                                                                                                                                                                                                                                                                                                                                                                                                                                                                                                                                                                                                                                                                                                                                                                                                                                                                                                                                                                                                                                                                                                                                                  |
| P08183 | 1   | 22947335                                                                                                                                                                                                                                                                                                                                                                                                                                                                                                                                                                                                                                                                                                                                                                                                                                                                                                                                                                                                                                                                                                                                                                                                                                                                                                  |
| P08185 | 1   | 20839151                                                                                                                                                                                                                                                                                                                                                                                                                                                                                                                                                                                                                                                                                                                                                                                                                                                                                                                                                                                                                                                                                                                                                                                                                                                                                                  |
| P08195 | 3   | 19120441;11920709;9678508                                                                                                                                                                                                                                                                                                                                                                                                                                                                                                                                                                                                                                                                                                                                                                                                                                                                                                                                                                                                                                                                                                                                                                                                                                                                                 |
| P08235 | 1   | 19364523                                                                                                                                                                                                                                                                                                                                                                                                                                                                                                                                                                                                                                                                                                                                                                                                                                                                                                                                                                                                                                                                                                                                                                                                                                                                                                  |
| P08237 | 2   | 9837860;132700                                                                                                                                                                                                                                                                                                                                                                                                                                                                                                                                                                                                                                                                                                                                                                                                                                                                                                                                                                                                                                                                                                                                                                                                                                                                                            |
| P08238 | 1   | 23487751                                                                                                                                                                                                                                                                                                                                                                                                                                                                                                                                                                                                                                                                                                                                                                                                                                                                                                                                                                                                                                                                                                                                                                                                                                                                                                  |

|        |    |                                                                                                                                                                                                                                                                                                                                                                                                                                                                                                                                                                                                                                                                                                        |
|--------|----|--------------------------------------------------------------------------------------------------------------------------------------------------------------------------------------------------------------------------------------------------------------------------------------------------------------------------------------------------------------------------------------------------------------------------------------------------------------------------------------------------------------------------------------------------------------------------------------------------------------------------------------------------------------------------------------------------------|
| P08246 | 4  | 11553680;11350640;9770243;9675307                                                                                                                                                                                                                                                                                                                                                                                                                                                                                                                                                                                                                                                                      |
| P08247 | 22 | 23678012;23249275;22815926;22052241;21476782;21424738;21249281;21145575;20132484;19961582;18802763;18352823;16497507;16237167;16100462;1602868;15602825;8848126;8615075;7735281;7859097;1316056                                                                                                                                                                                                                                                                                                                                                                                                                                                                                                        |
| P08253 | 17 | 24430993;23499793;22805224;21455784;19075231;19051747;19074020;18296463;17005848;16707787;11414785;11388663;11095516;10716770;20943915;22798270;21756007                                                                                                                                                                                                                                                                                                                                                                                                                                                                                                                                               |
| P08254 | 3  | 23926264;17184186;11095516                                                                                                                                                                                                                                                                                                                                                                                                                                                                                                                                                                                                                                                                             |
| P08294 | 50 | 23523993;21111721;20817464;20364349;19875292;19563509;19473058;18407497;18289003;17486444;17184187;16689664;16634331;16332351;16187294;16095570;16018585;15864722;15792522;15684769;15610928;15207346;15036352;14767765;14666020;14644473;12657369;12213642;11977524;11853017;11453434;11200253;11032904;11011974;10815757;10437099;10322962;9726263;9680175;9313901;8973665;8915909;7478738;7701506;7841663;1414256;2058414;2244484;6181480;16095570                                                                                                                                                                                                                                                  |
| P08559 | 4  | 20438613;20392143;19119913;2352011                                                                                                                                                                                                                                                                                                                                                                                                                                                                                                                                                                                                                                                                     |
| P08571 | 2  | 21599492;16206158                                                                                                                                                                                                                                                                                                                                                                                                                                                                                                                                                                                                                                                                                      |
| P08575 | 11 | 23466931;23313320;21740131;21599492;19077786;18438914;18088553;17432962;14570283;12794745;11045675                                                                                                                                                                                                                                                                                                                                                                                                                                                                                                                                                                                                     |
| P08581 | 9  | 22140459;22079829;20860549;20709122;20468053;18480987;17884290;17549731;17425951                                                                                                                                                                                                                                                                                                                                                                                                                                                                                                                                                                                                                       |
| P08588 | 8  | 22723636;17933964;14503640;6135730;21903880;22275761;15211988;7620299                                                                                                                                                                                                                                                                                                                                                                                                                                                                                                                                                                                                                                  |
| P08603 | 1  | 15785233                                                                                                                                                                                                                                                                                                                                                                                                                                                                                                                                                                                                                                                                                               |
| P08620 | 2  | 18581269;17207742                                                                                                                                                                                                                                                                                                                                                                                                                                                                                                                                                                                                                                                                                      |
| P08670 | 39 | 23632234;23272155;22978525;22865656;22791629;22161971;21956379;21883887;21250919;20645410;20155816;19257808;18930033;18374350;18316064;18065151;17671987;16902766;16344894;16294335;16240391;15335106;15207354;15115595;14610361;12900928;12861073;12655601;12619082;11746773;10683271;10225952;9872458;9417833;10975736;7541476;7540218;7955669;1895117                                                                                                                                                                                                                                                                                                                                               |
| P08758 | 1  | 20438770                                                                                                                                                                                                                                                                                                                                                                                                                                                                                                                                                                                                                                                                                               |
| P08833 | 4  | 12611774;18938163;9762866;7541476                                                                                                                                                                                                                                                                                                                                                                                                                                                                                                                                                                                                                                                                      |
| P08887 | 13 | 24042200;24042200;23639820;22369693;16129904;23639820;20478301;18446011;16184194;16129904;15128857;15048924;20478301                                                                                                                                                                                                                                                                                                                                                                                                                                                                                                                                                                                   |
| P08908 | 24 | 23300270;23221401;23099413;19840787;19260781;17881483;17214613;17204396;17047164;16914121;16836640;16739558;16488413;15872102;15649492;15380867;15321732;15275776;15152026;14622228;14575797;12764106;12610685;12560128                                                                                                                                                                                                                                                                                                                                                                                                                                                                                |
| P08913 | 11 | 22081708;21222499;19000416;2059129;2058414;21047936;1675858;758380;22275761;15211988;7620299                                                                                                                                                                                                                                                                                                                                                                                                                                                                                                                                                                                                           |
| P09038 | 77 | 22649227;19955358;12557207;11320601;9418975;9192376;1588636;23809528;23486600;23414684;23236888;23082997;22954116;22796886;22629425;22555431;22236767;22085254;22042562;21756547;21630429;22506349;20799884;20513364;20130176;20114065;19780197;19442692;18849003;18756526;18627027;18615534;18255230;18095482;17611275;17610915;17553847;17370779;17244329;17108169;16718733;16406666;16029658;16005441;15899248;15769312;15672632;12925000;12429182;12080821;11893024;11771937;11606629;11588623;10960593;10915567;10833309;10579585;10521141;10511239;10436058;10380979;10369555;9881728;9878195;9749747;9651218;9519278;9486767;8797678;8594213;7540200;8015371;7682969;23486600;23236888;23979726 |
| P09104 | 17 | 23143000;22220308;21553942;20734423;20078993;19499171;18543110;17184187;16528168;16506604;15670387;15207346;12535938;12435422;11299626;1333042;7204642                                                                                                                                                                                                                                                                                                                                                                                                                                                                                                                                                 |

|        |    |                                                                                                                                                                                                                                                                                                                                                                                                                                                                                                                                                                                                                                                                                                                                                       |
|--------|----|-------------------------------------------------------------------------------------------------------------------------------------------------------------------------------------------------------------------------------------------------------------------------------------------------------------------------------------------------------------------------------------------------------------------------------------------------------------------------------------------------------------------------------------------------------------------------------------------------------------------------------------------------------------------------------------------------------------------------------------------------------|
| P09172 | 11 | 16487151;10336136;10215931;9588600;9153661;7859097;1937684;7418270;938986;4430080;4784945                                                                                                                                                                                                                                                                                                                                                                                                                                                                                                                                                                                                                                                             |
| P09341 | 5  | 22798270;22655536;22404382;21604270;19932745                                                                                                                                                                                                                                                                                                                                                                                                                                                                                                                                                                                                                                                                                                          |
| P09382 | 5  | 21188398;20091712;19941913;15893752;15464279                                                                                                                                                                                                                                                                                                                                                                                                                                                                                                                                                                                                                                                                                                          |
| P09429 | 4  | 22158106;21343866;20195207;19090911                                                                                                                                                                                                                                                                                                                                                                                                                                                                                                                                                                                                                                                                                                                   |
| P09455 | 2  | 21196217;16688771                                                                                                                                                                                                                                                                                                                                                                                                                                                                                                                                                                                                                                                                                                                                     |
| P09486 | 1  | 17611274                                                                                                                                                                                                                                                                                                                                                                                                                                                                                                                                                                                                                                                                                                                                              |
| P09543 | 13 | 22952690;22500090;22174557;21336655;20374080;18008145;17061258;17044031;16447750;15845083;15378660;15006675;12431704                                                                                                                                                                                                                                                                                                                                                                                                                                                                                                                                                                                                                                  |
| P09601 | 22 | 24112949;21657851;19589199;19119918;19035757;17912625;17259328;17047682;16156717;16095570;15319001;14753474;12678694;11990353;11723173;11450046;11208917;11085891;11074053;11026506;9622586;20945816                                                                                                                                                                                                                                                                                                                                                                                                                                                                                                                                                  |
| P09603 | 1  | 9682014                                                                                                                                                                                                                                                                                                                                                                                                                                                                                                                                                                                                                                                                                                                                               |
| P09619 | 2  | 23236888;7657809                                                                                                                                                                                                                                                                                                                                                                                                                                                                                                                                                                                                                                                                                                                                      |
| P09874 | 16 | 23826370;23047384;21023933;20400038;19473038;19418318;19337722;19170890;18289003;17361386;16184194;15857303;15452194;13678663;12509801;11370817                                                                                                                                                                                                                                                                                                                                                                                                                                                                                                                                                                                                       |
| P09917 | 8  | 23303944;22986158;22947335;18059327;16019083;2166776;3143469;3480080                                                                                                                                                                                                                                                                                                                                                                                                                                                                                                                                                                                                                                                                                  |
| P09919 | 21 | 23433334;23419550;23209732;23139012;22862301;22391867;22253813;22024901;21935680;21721873;21539498;20887150;20801040;20202082;19499175;18406145;17882016;17641973;17618991;17391650;16958589                                                                                                                                                                                                                                                                                                                                                                                                                                                                                                                                                          |
| P09960 | 1  | 19469692                                                                                                                                                                                                                                                                                                                                                                                                                                                                                                                                                                                                                                                                                                                                              |
| POC862 | 1  | 20107429                                                                                                                                                                                                                                                                                                                                                                                                                                                                                                                                                                                                                                                                                                                                              |
| POCG47 | 17 | 22110033;21310818;21229311;19214301;17003280;17218303;15823098;11994804;11578629;10668768;10557125;9890271;9201240;8811125;8740714;8787148;1700034                                                                                                                                                                                                                                                                                                                                                                                                                                                                                                                                                                                                    |
| POCG48 | 17 | 22110033;21310818;21229311;19214301;17003280;17218303;15823098;11994804;11578629;10668768;10557125;9890271;9201240;8811125;8740714;8787148;1700034                                                                                                                                                                                                                                                                                                                                                                                                                                                                                                                                                                                                    |
| POCG63 | 1  | 23626776                                                                                                                                                                                                                                                                                                                                                                                                                                                                                                                                                                                                                                                                                                                                              |
| P10092 | 42 | 23867131;23068989;22635857;21939393;20970732;19660662;19372269;19247856;19235905;19146928;19059398;18824169;18712059;18338959;17719577;17577523;17540505;17503492;17331502;17314299;17046032;16839548;16540569;16305315;16099035;15665609;15082150;14637107;14637084;14552891;12811811;12402380;11168294;10960593;9486767;9344570;9116197;8875323;8201627;7795551;1667600;2682302                                                                                                                                                                                                                                                                                                                                                                     |
| P10144 | 1  | 19170890                                                                                                                                                                                                                                                                                                                                                                                                                                                                                                                                                                                                                                                                                                                                              |
| P10145 | 8  | 22420033;21700333;21107907;20038240;19303217;15744002;14691382;10730762                                                                                                                                                                                                                                                                                                                                                                                                                                                                                                                                                                                                                                                                               |
| P10147 | 8  | 22633330;22420033;21203390;13089302;21332278;21332278;22198270;20133816                                                                                                                                                                                                                                                                                                                                                                                                                                                                                                                                                                                                                                                                               |
| P10276 | 2  | 17239557;16420438                                                                                                                                                                                                                                                                                                                                                                                                                                                                                                                                                                                                                                                                                                                                     |
| P10415 | 81 | 23731227;23632234;23492769;23344852;23274522;23180094;23174180;22982298;22981449;22733360;22453521;22342994;22295509;22289688;21787762;21748659;21496122;21439269;21394310;21111721;20933583;20830289;20816819;20799028;20708606;20385073;20370565;20176685;20107429;19891733;19817205;19815005;19716366;19545280;19525878;19373550;19183262;19120440;18948848;18838947;18785877;18665052;18628687;18322000;18197140;18180375;17945432;17892411;17704735;17664140;17645692;17621255;17418876;17392476;17331604;17304106;16601144;16303916;16191756;15896972;15715081;15668909;15307905;15115604;12853305;12823889;12680327;12657369;12482121;12125080;11402882;11398181;11105694;11007881;10709875;10658186;9800272;9530781;8786386;23274522;19525878 |
| P10451 | 7  | 19813107;17392476;16345062;15592854;15528873;14513263;12820683                                                                                                                                                                                                                                                                                                                                                                                                                                                                                                                                                                                                                                                                                        |

|        |    |                                                                                                                                                                                                                                                                                                                                                                                                                                                                                                        |
|--------|----|--------------------------------------------------------------------------------------------------------------------------------------------------------------------------------------------------------------------------------------------------------------------------------------------------------------------------------------------------------------------------------------------------------------------------------------------------------------------------------------------------------|
| P10586 | 2  | 22836147;9076876                                                                                                                                                                                                                                                                                                                                                                                                                                                                                       |
| P10636 | 12 | 23499240;22514792;22052241;20717887;20038240;18680553;18307037;18219571;17233289;15715081;10759184;18680553                                                                                                                                                                                                                                                                                                                                                                                            |
| P10643 | 2  | 20952585;18578885                                                                                                                                                                                                                                                                                                                                                                                                                                                                                      |
| P10644 | 10 | 23603516;23177959;22342994;21671725;19293775;19222562;19141070;19138107;18656458;10804204                                                                                                                                                                                                                                                                                                                                                                                                              |
| P10645 | 1  | 21249281                                                                                                                                                                                                                                                                                                                                                                                                                                                                                               |
| P10646 | 2  | 16139333;8619181                                                                                                                                                                                                                                                                                                                                                                                                                                                                                       |
| P10721 | 4  | 23608618;22295509;19859984;19182706                                                                                                                                                                                                                                                                                                                                                                                                                                                                    |
| P10826 | 4  | 19800972;17239557;16984961;16688771                                                                                                                                                                                                                                                                                                                                                                                                                                                                    |
| P10909 | 2  | 15785233;11702232                                                                                                                                                                                                                                                                                                                                                                                                                                                                                      |
| P10914 | 1  | 11723173                                                                                                                                                                                                                                                                                                                                                                                                                                                                                               |
| P10916 | 1  | 2293623                                                                                                                                                                                                                                                                                                                                                                                                                                                                                                |
| P11055 | 4  | 22644570;20213470;15725214;15453091                                                                                                                                                                                                                                                                                                                                                                                                                                                                    |
| P11086 | 2  | 10906754;10363831                                                                                                                                                                                                                                                                                                                                                                                                                                                                                      |
| P11137 | 40 | 23419261;22815926;21704982;21658682;21375803;21355419;20707645;20698757;20155459;19925560;19476208;19462232;19318112;19106491;18992011;18672742;18584320;17706365;17701486;17397933;17115913;15790679;15522907;15077307;15051157;14570283;12614588;12429182;11563627;11200245;11045677;10912915;10776916;10759184;10737454;10712659;10412797;9326288;9350423;2800367                                                                                                                                   |
| P11161 | 2  | 20083105;11746771                                                                                                                                                                                                                                                                                                                                                                                                                                                                                      |
| P11166 | 2  | 20590523;14515352                                                                                                                                                                                                                                                                                                                                                                                                                                                                                      |
| P11177 | 4  | 20438613;20392143;19119913;2352011                                                                                                                                                                                                                                                                                                                                                                                                                                                                     |
| P11215 | 55 | 23526403;23313320;22815926;22629434;22425718;22329943;22041654;21704617;21336655;21142687;20427653;20374199;20155820;20083190;19946692;19780197;19332108;18849175;18617007;18455876;18438914;18353556;17882014;17671987;17506499;17432960;17329433;17244329;17184184;16978658;15995139;15739189;15737738;15635609;15610171;12794745;11912671;11890721;11588623;11146113;11114257;11064366;10998127;10914354;10195473;10098961;9795113;9670992;9582256;9418967;9285520;8989657;8981236;7629867;21970623 |
| P11229 | 2  | 12605884;23184186                                                                                                                                                                                                                                                                                                                                                                                                                                                                                      |
| P11836 | 1  | 21249281                                                                                                                                                                                                                                                                                                                                                                                                                                                                                               |
| P11926 | 3  | 21411654;10320037;7577724                                                                                                                                                                                                                                                                                                                                                                                                                                                                              |
| P12004 | 23 | 23602967;23526403;23180094;23135205;23093447;22510563;22484641;22246994;21710280;21229311;19376093;19205589;18008145;15528873;12666113;12578228;12499056;11585624;11077093;9507617;8963970;8524605;23526403                                                                                                                                                                                                                                                                                            |



|        |     |                                                                                                                                                                                                                                                                                                                                                                                                                                                                                                                                                                                                                                                                                                                                                                                                                                                                                                                                                                                                                                                                                                                                                                                                                                                                                                                                                                                                                                                                                                                            |
|--------|-----|----------------------------------------------------------------------------------------------------------------------------------------------------------------------------------------------------------------------------------------------------------------------------------------------------------------------------------------------------------------------------------------------------------------------------------------------------------------------------------------------------------------------------------------------------------------------------------------------------------------------------------------------------------------------------------------------------------------------------------------------------------------------------------------------------------------------------------------------------------------------------------------------------------------------------------------------------------------------------------------------------------------------------------------------------------------------------------------------------------------------------------------------------------------------------------------------------------------------------------------------------------------------------------------------------------------------------------------------------------------------------------------------------------------------------------------------------------------------------------------------------------------------------|
| P12036 | 171 | 23316955;23123586;23036616;23031841;23026410;22878503;22865656;2280524;22551686;22480691;22315999;22270191;22220714;22052241;21630429;21618230;21559863;21490212;21470565;21384547;21361731;21303267;21157914;21092402;20805831;20155820;19783284;19456214;19409869;19382871;19191513;19158290;18772508;18647603;18634003;18571867;18561916;19845152;18086148;17879538;17540505;17432961;16633897;16586436;16527274;16379576;16190875;16176808;16102815;15929557;15755556;15715083;15707984;15665609;15253805;15207354;15197746;15102919;15051157;14966352;14577863;14534158;12895449;12811811;12614588;12614587;12503060;12427329;12410380;11939503;11920709;11880833;11854516;11829345;11746773;11578629;11476597;11462799;11104506;10931587;10837800;10818764;10759184;10737623;10714264;10683270;10668431;10452368;10366029;10221783;9827690;9786407;9682827;9670992;9668671;9650755;9633812;9570810;9460769;9292692;9285520;9106471;10975736;8985951;8811121;8668354;7753403;8426193;1333605;1618033;1473395;1724469;1700924;3276818;3336206;3328836;3104553;3105816;6539814;7170062;713490;23916821;22815926;21618230;19103176;18990118;18508036;16447750;16305315;15869942;15854260;15673843;11226756;10683270;10383635;8873865;1700924;2258947;3819017;6539814;23793903;23614684;23419261;22848005;22270191;21658682;21618230;21337374;21258860;21251802;20805831;20698757;20678995;20447345;20381564;19533335;19462232;19458542;19413502;18772508;18578635;18484898;17703359;16190875;16176808;16099035;15576480; |
| P12235 | 1   | 15573402                                                                                                                                                                                                                                                                                                                                                                                                                                                                                                                                                                                                                                                                                                                                                                                                                                                                                                                                                                                                                                                                                                                                                                                                                                                                                                                                                                                                                                                                                                                   |
| P12259 | 2   | 19853891;15320513                                                                                                                                                                                                                                                                                                                                                                                                                                                                                                                                                                                                                                                                                                                                                                                                                                                                                                                                                                                                                                                                                                                                                                                                                                                                                                                                                                                                                                                                                                          |
| P12272 | 4   | 15577056;12201902;11035476;10578246                                                                                                                                                                                                                                                                                                                                                                                                                                                                                                                                                                                                                                                                                                                                                                                                                                                                                                                                                                                                                                                                                                                                                                                                                                                                                                                                                                                                                                                                                        |
| P12277 | 17  | 22775196;21305658;19365509;14997965;14969411;14659555;12214901;11990554;10622457;9848487;1955370;1819975;2718797;3165203;7271386;6071347;14167002                                                                                                                                                                                                                                                                                                                                                                                                                                                                                                                                                                                                                                                                                                                                                                                                                                                                                                                                                                                                                                                                                                                                                                                                                                                                                                                                                                          |
| P12314 | 1   | 19770513                                                                                                                                                                                                                                                                                                                                                                                                                                                                                                                                                                                                                                                                                                                                                                                                                                                                                                                                                                                                                                                                                                                                                                                                                                                                                                                                                                                                                                                                                                                   |
| P12643 | 12  | 22204020;22204004;21952743;21925422;21518886;21242869;19914878;18037352;21508230;23349763;20005873;20850923                                                                                                                                                                                                                                                                                                                                                                                                                                                                                                                                                                                                                                                                                                                                                                                                                                                                                                                                                                                                                                                                                                                                                                                                                                                                                                                                                                                                                |
| P12644 | 7   | 21508230;23349763;20005873;23635322;21918888;21407803;20005873                                                                                                                                                                                                                                                                                                                                                                                                                                                                                                                                                                                                                                                                                                                                                                                                                                                                                                                                                                                                                                                                                                                                                                                                                                                                                                                                                                                                                                                             |
| P12821 | 1   | 15889697                                                                                                                                                                                                                                                                                                                                                                                                                                                                                                                                                                                                                                                                                                                                                                                                                                                                                                                                                                                                                                                                                                                                                                                                                                                                                                                                                                                                                                                                                                                   |
| P12830 | 2   | 21679705;21316153                                                                                                                                                                                                                                                                                                                                                                                                                                                                                                                                                                                                                                                                                                                                                                                                                                                                                                                                                                                                                                                                                                                                                                                                                                                                                                                                                                                                                                                                                                          |
| P12882 | 5   | 24022865;16931550;11138583;10567091;8596693                                                                                                                                                                                                                                                                                                                                                                                                                                                                                                                                                                                                                                                                                                                                                                                                                                                                                                                                                                                                                                                                                                                                                                                                                                                                                                                                                                                                                                                                                |
| P12931 | 7   | 23867460;21573723;18307037;16906542;15307904;14753479;11563494                                                                                                                                                                                                                                                                                                                                                                                                                                                                                                                                                                                                                                                                                                                                                                                                                                                                                                                                                                                                                                                                                                                                                                                                                                                                                                                                                                                                                                                             |
| P13236 | 1   | 22798270                                                                                                                                                                                                                                                                                                                                                                                                                                                                                                                                                                                                                                                                                                                                                                                                                                                                                                                                                                                                                                                                                                                                                                                                                                                                                                                                                                                                                                                                                                                   |
| P13497 | 1   | 20850923                                                                                                                                                                                                                                                                                                                                                                                                                                                                                                                                                                                                                                                                                                                                                                                                                                                                                                                                                                                                                                                                                                                                                                                                                                                                                                                                                                                                                                                                                                                   |
| P13498 | 2   | 22884909;16345062                                                                                                                                                                                                                                                                                                                                                                                                                                                                                                                                                                                                                                                                                                                                                                                                                                                                                                                                                                                                                                                                                                                                                                                                                                                                                                                                                                                                                                                                                                          |
| P13500 | 25  | 23477757;23028465;22055556;22420055;21287269;21265596;21092402;20025539;20478301;20038240;19932745;19257808;18338959;17704735;17167171;16042867;15998793;15689362;15635609;15135227;12111830;11398181;8928610;20155916;18228050                                                                                                                                                                                                                                                                                                                                                                                                                                                                                                                                                                                                                                                                                                                                                                                                                                                                                                                                                                                                                                                                                                                                                                                                                                                                                            |
| P13501 | 6   | 22420033;21529317;20478301;18612314;16014718;9698165                                                                                                                                                                                                                                                                                                                                                                                                                                                                                                                                                                                                                                                                                                                                                                                                                                                                                                                                                                                                                                                                                                                                                                                                                                                                                                                                                                                                                                                                       |
| P13591 | 16  | 23419261;23186720;21650007;21516155;20581564;19445955;19170162;18820404;17626035;17014846;16860320;16443221;16087243;11212863;9671667;8164573                                                                                                                                                                                                                                                                                                                                                                                                                                                                                                                                                                                                                                                                                                                                                                                                                                                                                                                                                                                                                                                                                                                                                                                                                                                                                                                                                                              |
| P13611 | 8   | 13004405;17141901;14501854;12895450;12526051;12440575;11925444;10485914                                                                                                                                                                                                                                                                                                                                                                                                                                                                                                                                                                                                                                                                                                                                                                                                                                                                                                                                                                                                                                                                                                                                                                                                                                                                                                                                                                                                                                                    |
| P13612 | 6   | 22150233;20213330;19929361;19038604;18926823;23477737                                                                                                                                                                                                                                                                                                                                                                                                                                                                                                                                                                                                                                                                                                                                                                                                                                                                                                                                                                                                                                                                                                                                                                                                                                                                                                                                                                                                                                                                      |
| P13671 | 2   | 20952585;18578885                                                                                                                                                                                                                                                                                                                                                                                                                                                                                                                                                                                                                                                                                                                                                                                                                                                                                                                                                                                                                                                                                                                                                                                                                                                                                                                                                                                                                                                                                                          |
| P13726 | 1   | 8619181                                                                                                                                                                                                                                                                                                                                                                                                                                                                                                                                                                                                                                                                                                                                                                                                                                                                                                                                                                                                                                                                                                                                                                                                                                                                                                                                                                                                                                                                                                                    |
| P13945 | 2   | 21903880;22275187                                                                                                                                                                                                                                                                                                                                                                                                                                                                                                                                                                                                                                                                                                                                                                                                                                                                                                                                                                                                                                                                                                                                                                                                                                                                                                                                                                                                                                                                                                          |

|        |     |                                                                                                                                                                                                                                                                                                                                                                                                                                                                                                                                                                                                                                                                                                                                                                                                                                                                                                                                                                                                                                                                                                                                                                                                                                                                                                                                                                                                                                                                                                                                                                                                                                                                                                                                                                                                                                                                                                                                                                                                                                                                                                        |
|--------|-----|--------------------------------------------------------------------------------------------------------------------------------------------------------------------------------------------------------------------------------------------------------------------------------------------------------------------------------------------------------------------------------------------------------------------------------------------------------------------------------------------------------------------------------------------------------------------------------------------------------------------------------------------------------------------------------------------------------------------------------------------------------------------------------------------------------------------------------------------------------------------------------------------------------------------------------------------------------------------------------------------------------------------------------------------------------------------------------------------------------------------------------------------------------------------------------------------------------------------------------------------------------------------------------------------------------------------------------------------------------------------------------------------------------------------------------------------------------------------------------------------------------------------------------------------------------------------------------------------------------------------------------------------------------------------------------------------------------------------------------------------------------------------------------------------------------------------------------------------------------------------------------------------------------------------------------------------------------------------------------------------------------------------------------------------------------------------------------------------------------|
| P13987 | 1   | 20952585                                                                                                                                                                                                                                                                                                                                                                                                                                                                                                                                                                                                                                                                                                                                                                                                                                                                                                                                                                                                                                                                                                                                                                                                                                                                                                                                                                                                                                                                                                                                                                                                                                                                                                                                                                                                                                                                                                                                                                                                                                                                                               |
| P14136 | 302 | 23916821;23831998;23793903;23702616;23526403;23523995;23518227;23441695;23419261;23399872;23386122;23322541;23289019;23272155;23180094;23151374;23027386;23001399;22999930;22951907;22900481;22865681;22824304;22815926;22791629;22733360;22730180;22722907;22683506;22510563;22500090;22484641;22407596;22329943;22244304;22220714;22213649;22193443;22161971;22041654;22038545;22020092;21970623;21970342;21956379;21952042;21931744;21854445;21807380;21704617;21671795;21647706;21620945;21609310;21574060;21488085;21402118;21375803;21355419;21337374;21336655;21334381;21316362;21284970;21264949;21258860;21251802;21250919;21222572;21046809;20887664;20734425;20711818;20707645;20702718;20619335;20590523;20399758;20381564;20375134;20370565;20307513;20226782;20202079;20184788;20170651;20155459;20151365;20130193;20109536;20083105;20038240;20005873;19934591;19815010;19782669;19533524;19528093;19494564;19445935;19418545;19383087;19350385;19332108;19330845;19196180;19191513;19182380;19165795;19069631;18992013;18971163;18722369;18721107;18672742;18649176;18618667;18617007;18614693;18484898;18482974;18406145;18373484;18358622;18353556;18316064;18291533;18213442;18194440;18065151;18008145;18001275;17917587;17907381;17671987;17611275;17601981;17506499;17503492;17482149;17438016;17432961;17425951;17376003;17329414;17244329;17074445;17044031;16902766;16850748;16808875;16806707;16774471;16689668;16671481;16633897;16626970;16586436;16447750;16406666;16294335;16262629;16240391;16219025;16190875;16172374;16100462;16099038;16087243;16083359;16051494;16041804;16038450;16010451;16004983;15998793;15892602;15892130;15866044;15857397;15769312;15739189;15736057;15680701;15672632;15668227;15605375;15530871;15495269;15335106;15319002;15307906;15207354;15197746;15129757;15115596;15115595;15051157;15006675;14999065;14993064;14991839;14981254;14962555;14769386;14705147;14651809;14644473;14610361;14577863;14570283;14534257;14534158;12900928;12895450;12861073;12821387;12797382;12673833;12655601;12619082;12578228;12499056;12379246;121515 |
| P14151 | 1   | 21142687                                                                                                                                                                                                                                                                                                                                                                                                                                                                                                                                                                                                                                                                                                                                                                                                                                                                                                                                                                                                                                                                                                                                                                                                                                                                                                                                                                                                                                                                                                                                                                                                                                                                                                                                                                                                                                                                                                                                                                                                                                                                                               |
| P14174 | 8   | 23018747;23140983;22853439;22013732;19125230;10460709;15007333;937843                                                                                                                                                                                                                                                                                                                                                                                                                                                                                                                                                                                                                                                                                                                                                                                                                                                                                                                                                                                                                                                                                                                                                                                                                                                                                                                                                                                                                                                                                                                                                                                                                                                                                                                                                                                                                                                                                                                                                                                                                                  |
| P14209 | 3   | 23632234;21249281;18054697                                                                                                                                                                                                                                                                                                                                                                                                                                                                                                                                                                                                                                                                                                                                                                                                                                                                                                                                                                                                                                                                                                                                                                                                                                                                                                                                                                                                                                                                                                                                                                                                                                                                                                                                                                                                                                                                                                                                                                                                                                                                             |
| P14210 | 10  | 22140459;22079829;21903726;20860549;20468053;18480987;17884290;17600518;17549731;17425951                                                                                                                                                                                                                                                                                                                                                                                                                                                                                                                                                                                                                                                                                                                                                                                                                                                                                                                                                                                                                                                                                                                                                                                                                                                                                                                                                                                                                                                                                                                                                                                                                                                                                                                                                                                                                                                                                                                                                                                                              |
| P14317 | 26  | 23809594;23792206;23303920;21630007;21337374;20083105;19429149;18373484;17706365;17503492;16691121;16305316;16102813;15530871;14593216;14552870;12440358;12408842;11331375;11311801;11223160;10993692;10384258;9671662;9669765;9391013                                                                                                                                                                                                                                                                                                                                                                                                                                                                                                                                                                                                                                                                                                                                                                                                                                                                                                                                                                                                                                                                                                                                                                                                                                                                                                                                                                                                                                                                                                                                                                                                                                                                                                                                                                                                                                                                 |
| P14416 | 1   | 12946566                                                                                                                                                                                                                                                                                                                                                                                                                                                                                                                                                                                                                                                                                                                                                                                                                                                                                                                                                                                                                                                                                                                                                                                                                                                                                                                                                                                                                                                                                                                                                                                                                                                                                                                                                                                                                                                                                                                                                                                                                                                                                               |
| P14555 | 13  | 22029359;18751914;22581384;21142140;20127525;18755070;17917587;16566026;16498630;15248295;11499402;8522975;7473799                                                                                                                                                                                                                                                                                                                                                                                                                                                                                                                                                                                                                                                                                                                                                                                                                                                                                                                                                                                                                                                                                                                                                                                                                                                                                                                                                                                                                                                                                                                                                                                                                                                                                                                                                                                                                                                                                                                                                                                     |
| P14625 | 1   | 21807380                                                                                                                                                                                                                                                                                                                                                                                                                                                                                                                                                                                                                                                                                                                                                                                                                                                                                                                                                                                                                                                                                                                                                                                                                                                                                                                                                                                                                                                                                                                                                                                                                                                                                                                                                                                                                                                                                                                                                                                                                                                                                               |
| P14672 | 3   | 22865656;15107410;9837860                                                                                                                                                                                                                                                                                                                                                                                                                                                                                                                                                                                                                                                                                                                                                                                                                                                                                                                                                                                                                                                                                                                                                                                                                                                                                                                                                                                                                                                                                                                                                                                                                                                                                                                                                                                                                                                                                                                                                                                                                                                                              |
| P14778 | 4   | 19932745;19932745;17382514;11565605                                                                                                                                                                                                                                                                                                                                                                                                                                                                                                                                                                                                                                                                                                                                                                                                                                                                                                                                                                                                                                                                                                                                                                                                                                                                                                                                                                                                                                                                                                                                                                                                                                                                                                                                                                                                                                                                                                                                                                                                                                                                    |

|        |    |                                                                                                                                                                                                                                                                                                                                                                                                                                                                                                                                                                                                               |
|--------|----|---------------------------------------------------------------------------------------------------------------------------------------------------------------------------------------------------------------------------------------------------------------------------------------------------------------------------------------------------------------------------------------------------------------------------------------------------------------------------------------------------------------------------------------------------------------------------------------------------------------|
| P14780 | 41 | 20943913;22798270;24436993;23926264;23867460;23731227;22853439;22805224;22798270;22655536;22409448;22049432;21784069;21756907;21657851;21455784;21287269;21248119;21176673;20965533;20947810;20862369;20382225;20029964;19780197;19675231;19074020;18384773;18352832;18298463;17217414;17071951;16454634;12956462;12196576;11414785;11388663;11150324;11095516;10716770;21756007                                                                                                                                                                                                                              |
| P14784 | 3  | 9014956;8164533;1331272                                                                                                                                                                                                                                                                                                                                                                                                                                                                                                                                                                                       |
| P14867 | 1  | 17115913                                                                                                                                                                                                                                                                                                                                                                                                                                                                                                                                                                                                      |
| P14902 | 2  | 23415704;8149236                                                                                                                                                                                                                                                                                                                                                                                                                                                                                                                                                                                              |
| P15018 | 14 | 22715999;22085254;18673204;17111361;16957585;16563523;15779090;15537875;15246839;14651808;12589929;10712626;10212315;10712626                                                                                                                                                                                                                                                                                                                                                                                                                                                                                 |
| P15104 | 3  | 23525248;17893916;10962139                                                                                                                                                                                                                                                                                                                                                                                                                                                                                                                                                                                    |
| P15173 | 7  | 22644570;20213470;19214561;18236467;16184607;12611774;9755066                                                                                                                                                                                                                                                                                                                                                                                                                                                                                                                                                 |
| P15309 | 1  | 11193545                                                                                                                                                                                                                                                                                                                                                                                                                                                                                                                                                                                                      |
| P15336 | 12 | 23583688;21970623;21671725;20552220;19293775;18785877;18672032;17719180;16478624;15896906;14662791;12721213                                                                                                                                                                                                                                                                                                                                                                                                                                                                                                   |
| P15559 | 8  | 22853439;19589199;17618976;17584182;11532430;10686069;8710182;884812623562792;23486600;23236888;23116416;23064509;22792773;22683506;22453521;22450230;22186804;22145921;22085254;22023610;21818951;21735784;21630429;21568693;21396163;21299336;22506349;21192293;21092735;20860549;20799882;20701430;20698758;20468053;20334467;20010384;19879362;19442162;19319198;19257807;19226205;18990142;18773817;18599078;18367307;17666954;17633488;17600519;17420770;17409380;17229351;16284571;15319002;15307904;15191799;15161688;14753479;14584823;12927201;12134907;11029637;10100251;0517460;23486600;23236888 |
| P15692 | 58 |                                                                                                                                                                                                                                                                                                                                                                                                                                                                                                                                                                                                               |
| P15863 | 1  | 9171182                                                                                                                                                                                                                                                                                                                                                                                                                                                                                                                                                                                                       |
| P16035 | 1  | 10716770                                                                                                                                                                                                                                                                                                                                                                                                                                                                                                                                                                                                      |
| P16070 | 2  | 21599492;15308314                                                                                                                                                                                                                                                                                                                                                                                                                                                                                                                                                                                             |
| P16104 | 1  | 21748659                                                                                                                                                                                                                                                                                                                                                                                                                                                                                                                                                                                                      |
| P16109 | 2  | 11563627;10094148                                                                                                                                                                                                                                                                                                                                                                                                                                                                                                                                                                                             |
| P16112 | 8  | 23027380;23001399;21932042;20534823;19075231;18514199;10987227;11423924;23583088;22981449;22911773;22584207;21970023;19293773;18785877;18072032;17720160;17719180;16478624;15922485;15896906;15869943;15611995;15135227                                                                                                                                                                                                                                                                                                                                                                                       |
| P16220 | 16 |                                                                                                                                                                                                                                                                                                                                                                                                                                                                                                                                                                                                               |
| P16234 | 4  | 22629425;20130176;16691121;7657809                                                                                                                                                                                                                                                                                                                                                                                                                                                                                                                                                                            |
| P16278 | 18 | 20170651;18343575;17885772;16289170;15716305;15115607;12904465;12482121;12203389;12115695;11606629;11550223;11424189;10933968;10023440;9651218;9417824;9369296                                                                                                                                                                                                                                                                                                                                                                                                                                                |
| P16284 | 3  | 22336872;21630007;20153400                                                                                                                                                                                                                                                                                                                                                                                                                                                                                                                                                                                    |
| P16298 | 8  | 23981724;18577426;14767765;12429226;11060810;11007881;9878202;8791233                                                                                                                                                                                                                                                                                                                                                                                                                                                                                                                                         |
| P16389 | 4  | 22407783;21110920;14984408;10712629                                                                                                                                                                                                                                                                                                                                                                                                                                                                                                                                                                           |
| P16422 | 1  | 20875224                                                                                                                                                                                                                                                                                                                                                                                                                                                                                                                                                                                                      |
| P16885 | 1  | 20070863                                                                                                                                                                                                                                                                                                                                                                                                                                                                                                                                                                                                      |
| P17302 | 12 | 9183689;23403365;22975435;22951907;22469052;22399755;18649176;18617007;15977163;10751674;9183689;22951907                                                                                                                                                                                                                                                                                                                                                                                                                                                                                                     |
| P17405 | 2  | 18838947;18751914                                                                                                                                                                                                                                                                                                                                                                                                                                                                                                                                                                                             |
| P17538 | 1  | 19442692                                                                                                                                                                                                                                                                                                                                                                                                                                                                                                                                                                                                      |
| P17600 | 12 | 23859181;22579680;22384207;21316361;20384775;20132484;19138107;18672032;17719180;17083989;15869943;21145575                                                                                                                                                                                                                                                                                                                                                                                                                                                                                                   |

|        |    |                                                                                                                                                                                                                                                                                                                                                                                                                                                                                                                                                                                                                                                                                                                                                                                                                              |
|--------|----|------------------------------------------------------------------------------------------------------------------------------------------------------------------------------------------------------------------------------------------------------------------------------------------------------------------------------------------------------------------------------------------------------------------------------------------------------------------------------------------------------------------------------------------------------------------------------------------------------------------------------------------------------------------------------------------------------------------------------------------------------------------------------------------------------------------------------|
| P17612 | 10 | 23603516;23177959;22342994;21671725;19293775;19222562;19141070;19138107;18656458;10804204                                                                                                                                                                                                                                                                                                                                                                                                                                                                                                                                                                                                                                                                                                                                    |
| P17655 | 1  | 10878587                                                                                                                                                                                                                                                                                                                                                                                                                                                                                                                                                                                                                                                                                                                                                                                                                     |
| P17661 | 1  | 16931550                                                                                                                                                                                                                                                                                                                                                                                                                                                                                                                                                                                                                                                                                                                                                                                                                     |
| P17676 | 6  | 24042200;24042200;23639820;22369693;16129904;22578249                                                                                                                                                                                                                                                                                                                                                                                                                                                                                                                                                                                                                                                                                                                                                                        |
| P17677 | 90 | 23174180;22827732;22805224;22542946;22504113;22426865;22193443;21884698;21833549;21630006;21611127;21402118;21316153;21308793;21046809;20513364;20381564;19761692;19757023;19679168;19559075;18647603;18602393;18482724;17928316;17885772;17879538;17503492;17466943;17447249;17382306;17331502;17131417;16965762;16897366;16862564;16839548;16460709;16367770;16367769;16240391;16038451;16022864;15862959;15716400;15665609;15522871;15350649;15296835;15128857;15004554;14966352;14637107;14637084;14598294;14552895;14520670;12578228;12440381;12151536;12125080;11939502;11920709;11880833;11867737;11867727;11813238;11776060;11773606;11398181;11154843;10785453;10762348;10632033;10383635;10343327;10336136;9878202;9827690;9671667;9453362;9391013;9300440;8811121;7478195;8405276;7694445;8426193;1421106;1333987 |
| P17813 | 2  | 20153400;19859984                                                                                                                                                                                                                                                                                                                                                                                                                                                                                                                                                                                                                                                                                                                                                                                                            |
| P17861 | 3  | 22337234;17578450;16156717                                                                                                                                                                                                                                                                                                                                                                                                                                                                                                                                                                                                                                                                                                                                                                                                   |
| P17927 | 3  | 19736560;17882014;8989657                                                                                                                                                                                                                                                                                                                                                                                                                                                                                                                                                                                                                                                                                                                                                                                                    |
| P17931 | 6  | 22884909;22510563;21394541;21187959;17460353;16345062                                                                                                                                                                                                                                                                                                                                                                                                                                                                                                                                                                                                                                                                                                                                                                        |
| P17936 | 3  | 18938163;9762866;7541476                                                                                                                                                                                                                                                                                                                                                                                                                                                                                                                                                                                                                                                                                                                                                                                                     |
| P17948 | 5  | 19319198;18773817;17409380;12927201;11029637                                                                                                                                                                                                                                                                                                                                                                                                                                                                                                                                                                                                                                                                                                                                                                                 |
| P18065 | 4  | 12611774;18938163;9762866;7541476                                                                                                                                                                                                                                                                                                                                                                                                                                                                                                                                                                                                                                                                                                                                                                                            |
| P18075 | 6  | 23349763;20005873;19765637;15648662;11720729;10699444                                                                                                                                                                                                                                                                                                                                                                                                                                                                                                                                                                                                                                                                                                                                                                        |
| P18405 | 1  | 23542439                                                                                                                                                                                                                                                                                                                                                                                                                                                                                                                                                                                                                                                                                                                                                                                                                     |
| P18507 | 14 | 19358834;23542439;23332495;22449374;20203195;19358834;19225548;18845615;18206170;17376001;17046753;15157699;12618352;18495826                                                                                                                                                                                                                                                                                                                                                                                                                                                                                                                                                                                                                                                                                                |
| P18509 | 10 | 22674051;21187959;18677446;18410926;16888234;16198696;15913892;15698618;10804204;9582259                                                                                                                                                                                                                                                                                                                                                                                                                                                                                                                                                                                                                                                                                                                                     |
| P18510 | 8  | 21559865;20974240;20509754;18075201;17582514;11505005;10750705;8902001                                                                                                                                                                                                                                                                                                                                                                                                                                                                                                                                                                                                                                                                                                                                                       |
| P18847 | 3  | 19853381;17284176;16420436                                                                                                                                                                                                                                                                                                                                                                                                                                                                                                                                                                                                                                                                                                                                                                                                   |
| P18848 | 3  | 22873727;22337234;21933012                                                                                                                                                                                                                                                                                                                                                                                                                                                                                                                                                                                                                                                                                                                                                                                                   |
| P18850 | 3  | 22873727;21933012;21638341                                                                                                                                                                                                                                                                                                                                                                                                                                                                                                                                                                                                                                                                                                                                                                                                   |
| P19174 | 3  | 12098653;9840766;20070863                                                                                                                                                                                                                                                                                                                                                                                                                                                                                                                                                                                                                                                                                                                                                                                                    |
| P19235 | 10 | 21167907;21056627;19110203;17614942;16619678;16260722;15792521;15456912;15247477;11854521                                                                                                                                                                                                                                                                                                                                                                                                                                                                                                                                                                                                                                                                                                                                    |
| P19320 | 4  | 17073815;11031083;8928610;23477737                                                                                                                                                                                                                                                                                                                                                                                                                                                                                                                                                                                                                                                                                                                                                                                           |
| P19438 | 19 | 22840455;21309692;20309734;19949368;19469692;16083358;14552870;11517251;22840455;22484641;21185611;20107429;18322000;17621255;17443214;16629620;16083358;12111861;11517251                                                                                                                                                                                                                                                                                                                                                                                                                                                                                                                                                                                                                                                   |
| P19440 | 1  | 8732872                                                                                                                                                                                                                                                                                                                                                                                                                                                                                                                                                                                                                                                                                                                                                                                                                      |
| P19793 | 4  | 17239557;16420438;17201484;16420438                                                                                                                                                                                                                                                                                                                                                                                                                                                                                                                                                                                                                                                                                                                                                                                          |

|        |    |                                                                                                                                                                                                                                                                                                                                                                                                                                                                                                                                                                                                        |
|--------|----|--------------------------------------------------------------------------------------------------------------------------------------------------------------------------------------------------------------------------------------------------------------------------------------------------------------------------------------------------------------------------------------------------------------------------------------------------------------------------------------------------------------------------------------------------------------------------------------------------------|
| P19838 | 65 | 23880092;23574812;23553703;23499960;23492769;23361876;23359120;22981449;22853439;22798270;22733360;22578249;22484641;22450230;22324804;22289688;22125095;22038545;21889575;21784069;21510818;21383505;20954833;20868716;20862369;20830289;20799028;20708606;20646530;20370565;20176685;20091771;20047904;19891733;19716366;19522780;19418318;19416634;19358984;19295488;19056384;18948848;18665052;18628687;18197140;18180375;17918744;17664140;16776360;16253423;16179517;15998793;15922485;15684769;15478370;15452194;15229242;15135227;11517251;11393255;11150324;10428065;9729336-9547234-17918744 |
| P19875 | 3  | 19932745;19257808;12111830                                                                                                                                                                                                                                                                                                                                                                                                                                                                                                                                                                             |
| P20020 | 1  | 21303658                                                                                                                                                                                                                                                                                                                                                                                                                                                                                                                                                                                               |
| P20023 | 3  | 17882014;8989657;16936276                                                                                                                                                                                                                                                                                                                                                                                                                                                                                                                                                                              |
| P20042 | 1  | 17578450                                                                                                                                                                                                                                                                                                                                                                                                                                                                                                                                                                                               |
| P20309 | 4  | 22386753;23184186;10069506;7742851                                                                                                                                                                                                                                                                                                                                                                                                                                                                                                                                                                     |
| P20333 | 16 | 22840455;22484041;21185011;20107429;18522000;17621255;17445214;16029020;16083358;12111861;11517251;19949368;19469692;16083358;14552870;11517251                                                                                                                                                                                                                                                                                                                                                                                                                                                        |
| P20366 | 36 | 23564154;22825006;22781650;21671725;20096457;17924052;17314299;17251415;16918386;16680762;15998524;15807261;15253807;15135936;15082150;12895449;12402380;11427303;11342967;10651897;10393880;10336136;10085363;9670992;9153661;9416325;8988397;7543799;7795551;7691648;1284659;1701525;3401725;2426476;2410810;6181489                                                                                                                                                                                                                                                                                 |
| P20396 | 54 | 18980474;15995112;15665420;11586111;10499720;8710051;8685080;7643599;7473798;7768282;7659833;7543799;8487676;8432363;8278676;1636062;1570411;1813666;1797554;1850699;2123006;2120495;2112263;2508415;2499400;2497681;2497678;3132308;2830771;3127616;3116691;3124256;3128405;3127060;3106200;3090448;3010180;2870700;3945478;3842372;3927795;2410810;3917942;3004747;6435011;6433052;6097276;6657511;6410971;6306678;6811967;6799827-6702542-6116103                                                                                                                                                   |
| P20472 | 3  | 22000862;21930674;21445247                                                                                                                                                                                                                                                                                                                                                                                                                                                                                                                                                                             |
| P20701 | 2  | 9031328;8928610                                                                                                                                                                                                                                                                                                                                                                                                                                                                                                                                                                                        |

|        |     |                                                                                                                                                                                                                                                                                                                                                                                                                                                                                                                                                                                                                                                                                                                                                                                                                                                                                                                                                                                                                                                                                                                                                                                                                                                                                                                                                                                                                                                                                                                                                                                                                                                                      |
|--------|-----|----------------------------------------------------------------------------------------------------------------------------------------------------------------------------------------------------------------------------------------------------------------------------------------------------------------------------------------------------------------------------------------------------------------------------------------------------------------------------------------------------------------------------------------------------------------------------------------------------------------------------------------------------------------------------------------------------------------------------------------------------------------------------------------------------------------------------------------------------------------------------------------------------------------------------------------------------------------------------------------------------------------------------------------------------------------------------------------------------------------------------------------------------------------------------------------------------------------------------------------------------------------------------------------------------------------------------------------------------------------------------------------------------------------------------------------------------------------------------------------------------------------------------------------------------------------------------------------------------------------------------------------------------------------------|
| P20783 | 183 | 23792206;23746279;23257628;23131414;23066785;22993437;22875000;22573254;22244304;22211901;22159095;22137336;22130565;22042649;21996274;21995852;21783247;21470565;21441969;21420392;21384547;21375803;21243429;21135740;21105148;21083432;20846445;20816761;20660255;20619785;20597688;20399758;20350361;20005688;19812967;19884507;19874785;19818206;19784741;19648914;19603426;19513915;19442692;19383401;19240691;19203225;19054721;18672742;18585435;18369383;18338331;18253945;18191837;18159998;18077567;17881483;17719577;17708337;17671987;17540369;17522325;17459471;17439351;17376002;17316612;17221884;17112518;17072444;17055159;17014846;16988042;16928183;16919351;16797770;16786574;16773039;16764857;16718733;16689666;16632552;16430373;16387298;16289170;16102815;16099035;16049170;16022868;15869943;15858411;15716305;15652986;15649491;15262419;15254096;15128857;15114617;14637085;14637084;14515351;12904465;12895449;12781986;12774239;12710933;12676157;12598631;12589929;12435430;12353221;12173755;12099279;12009779;11810020;11755791;11550223;11377851;11358454;11241740;11200253;11186234;11168530;11114257;11104504;11077420;10993692;10757326;10712659;10683293;10583476;10581084;10448414;10212315;9840350;9822165;9743566;9699155;9651218;9486767;9417827;9391013;9204937;9000447;8594213;7561352;7841375;8114912;8298102;1333605;23360280;23124646;23098734;21430166;21421025;20819171;20600315;20554000;20171177;19118106;18095482;17686909;17584113;16629625;16305315;14699980;12589927;12440384;12440372;12440358;11923434;10811391;10384258;9932426;9369296;9199395;8993706;15901762;15748877;15144859;15032708;10763505;1072 |
| P20800 | 3   | 17893916;12668144;12668144                                                                                                                                                                                                                                                                                                                                                                                                                                                                                                                                                                                                                                                                                                                                                                                                                                                                                                                                                                                                                                                                                                                                                                                                                                                                                                                                                                                                                                                                                                                                                                                                                                           |
| P20809 | 1   | 22715999                                                                                                                                                                                                                                                                                                                                                                                                                                                                                                                                                                                                                                                                                                                                                                                                                                                                                                                                                                                                                                                                                                                                                                                                                                                                                                                                                                                                                                                                                                                                                                                                                                                             |
| P20827 | 2   | 21603973;21603973                                                                                                                                                                                                                                                                                                                                                                                                                                                                                                                                                                                                                                                                                                                                                                                                                                                                                                                                                                                                                                                                                                                                                                                                                                                                                                                                                                                                                                                                                                                                                                                                                                                    |
| P20916 | 48  | 23592243;22350947;22133879;21784510;21699896;21596039;21110803;21087927;20702718;20547125;20534525;20484625;19800972;19757023;19619659;19337830;19158290;18930141;18820405;18701700;17692017;17623024;17362886;17072444;17011208;15866044;15634734;15548666;15525355;15504325;15128857;15073526;15031718;12812757;12764110;12718855;12658441;12440377;12165135;11752461;11358445;10743699;10483914;9486767;9055294;8950700;8085934                                                                                                                                                                                                                                                                                                                                                                                                                                                                                                                                                                                                                                                                                                                                                                                                                                                                                                                                                                                                                                                                                                                                                                                                                                   |
| P21145 | 1   | 23196718                                                                                                                                                                                                                                                                                                                                                                                                                                                                                                                                                                                                                                                                                                                                                                                                                                                                                                                                                                                                                                                                                                                                                                                                                                                                                                                                                                                                                                                                                                                                                                                                                                                             |
| P21217 | 1   | 19476208                                                                                                                                                                                                                                                                                                                                                                                                                                                                                                                                                                                                                                                                                                                                                                                                                                                                                                                                                                                                                                                                                                                                                                                                                                                                                                                                                                                                                                                                                                                                                                                                                                                             |
| P21246 | 1   | 15350649                                                                                                                                                                                                                                                                                                                                                                                                                                                                                                                                                                                                                                                                                                                                                                                                                                                                                                                                                                                                                                                                                                                                                                                                                                                                                                                                                                                                                                                                                                                                                                                                                                                             |
| P21291 | 1   | 22288476                                                                                                                                                                                                                                                                                                                                                                                                                                                                                                                                                                                                                                                                                                                                                                                                                                                                                                                                                                                                                                                                                                                                                                                                                                                                                                                                                                                                                                                                                                                                                                                                                                                             |
| P21453 | 2   | 22417787;16990586                                                                                                                                                                                                                                                                                                                                                                                                                                                                                                                                                                                                                                                                                                                                                                                                                                                                                                                                                                                                                                                                                                                                                                                                                                                                                                                                                                                                                                                                                                                                                                                                                                                    |
| P21554 | 21  | 23152849;23108547;22791629;21813113;21265596;20920894;20156559;20035773;20214038;18930143;17045264;16360182;12823482;11249966;10860578;10357256;21813113;20035773;19533526;17045264;11249966                                                                                                                                                                                                                                                                                                                                                                                                                                                                                                                                                                                                                                                                                                                                                                                                                                                                                                                                                                                                                                                                                                                                                                                                                                                                                                                                                                                                                                                                         |
| P21579 | 1   | 24041988                                                                                                                                                                                                                                                                                                                                                                                                                                                                                                                                                                                                                                                                                                                                                                                                                                                                                                                                                                                                                                                                                                                                                                                                                                                                                                                                                                                                                                                                                                                                                                                                                                                             |
| P21583 | 2   | 20887150;19182706                                                                                                                                                                                                                                                                                                                                                                                                                                                                                                                                                                                                                                                                                                                                                                                                                                                                                                                                                                                                                                                                                                                                                                                                                                                                                                                                                                                                                                                                                                                                                                                                                                                    |
| P21589 | 2   | 23477737;6317425                                                                                                                                                                                                                                                                                                                                                                                                                                                                                                                                                                                                                                                                                                                                                                                                                                                                                                                                                                                                                                                                                                                                                                                                                                                                                                                                                                                                                                                                                                                                                                                                                                                     |
| P21728 | 11  | 23775067;22510563;19204052;15664589;12946566;12666113;12506309;11893891;1726151;19204052;18480366                                                                                                                                                                                                                                                                                                                                                                                                                                                                                                                                                                                                                                                                                                                                                                                                                                                                                                                                                                                                                                                                                                                                                                                                                                                                                                                                                                                                                                                                                                                                                                    |
| P21730 | 2   | 23855891;23033813                                                                                                                                                                                                                                                                                                                                                                                                                                                                                                                                                                                                                                                                                                                                                                                                                                                                                                                                                                                                                                                                                                                                                                                                                                                                                                                                                                                                                                                                                                                                                                                                                                                    |
| P21741 | 1   | 21196217                                                                                                                                                                                                                                                                                                                                                                                                                                                                                                                                                                                                                                                                                                                                                                                                                                                                                                                                                                                                                                                                                                                                                                                                                                                                                                                                                                                                                                                                                                                                                                                                                                                             |
| P21817 | 2   | 15032708;11939501                                                                                                                                                                                                                                                                                                                                                                                                                                                                                                                                                                                                                                                                                                                                                                                                                                                                                                                                                                                                                                                                                                                                                                                                                                                                                                                                                                                                                                                                                                                                                                                                                                                    |

|        |    |                                                                                                                                                                                                                                                             |
|--------|----|-------------------------------------------------------------------------------------------------------------------------------------------------------------------------------------------------------------------------------------------------------------|
| P21860 | 1  | 23758598                                                                                                                                                                                                                                                    |
| P21917 | 1  | 11979329                                                                                                                                                                                                                                                    |
| P21918 | 2  | 19204052;18480366                                                                                                                                                                                                                                           |
| P21980 | 3  | 22042649;12065630;11402370                                                                                                                                                                                                                                  |
| P22004 | 1  | 21196217                                                                                                                                                                                                                                                    |
| P22083 | 2  | 22791629;20875224                                                                                                                                                                                                                                           |
| P22301 | 28 | 23828573;23731227;23140983;23028463;22875000;22825006;22593113;22205935;21760535;21411654;21111721;20863526;20623539;20334467;19716366;19183262;16253423;15892959;15453992;14760011;14622710;14588118;14563689;12165135;12042099;11170729;10547095;10506519 |
| P22303 | 20 | 23386718;23184186;17439352;16332351;12149929;11873957;11045565;10895495;10797957;9685649;9587481;9165429;9062807;8861623;7939462;8450950;1452079;1506033;339874;1239682                                                                                     |
| P22352 | 16 | 22400292;21559420;20504549;19875292;19159057;18055702;18407497;17480444;16634331;16018585;15864722;15610928;15036352;14644473;11011974;7701506                                                                                                              |
| P22459 | 1  | 23896350                                                                                                                                                                                                                                                    |
| P22466 | 5  | 16198696;15476702;15236239;11045565;7576312                                                                                                                                                                                                                 |
| P22694 | 10 | 23603516;23177959;22342994;21671725;19293775;19222562;19141070;19138107;18656458;10804204                                                                                                                                                                   |
| P22736 | 1  | 17201484                                                                                                                                                                                                                                                    |
| P22894 | 1  | 22687332                                                                                                                                                                                                                                                    |
| P22897 | 3  | 23775900;22233298;21656712                                                                                                                                                                                                                                  |
| P23219 | 21 | 17184185;15885321;11063829;9886082;23901068;21933591;21781963;17184185;15319002;15293235;15141096;11107569;11063829;11032961;10393880;9872457;9000453;8657340;1588635;3143469;3418749                                                                       |
| P23229 | 1  | 17161391                                                                                                                                                                                                                                                    |
| P23297 | 1  | 9669763                                                                                                                                                                                                                                                     |
| P23415 | 7  | 23248270;21775715;20733588;20190766;17046753;12957506;12618352                                                                                                                                                                                              |
| P23443 | 6  | 18236467;17885021;20678995;20678995;20678995;17885021                                                                                                                                                                                                       |
| P23458 | 7  | 21833847;16417589;17131417;16957585;16890196;22715999;20161735                                                                                                                                                                                              |
| P23515 | 23 | 23642707;22350947;21699896;21596039;21087927;20547125;20484625;19757023;19672953;19619659;19580419;18930141;18820405;18692574;17692017;17630211;17011208;15866044;15548666;15504325;15128857;12764110;12658441                                              |
| P23528 | 2  | 22110655;19138107                                                                                                                                                                                                                                           |

|        |     |                                                                                                                                                                                                                                                                                                                                                                                                                                                                                                                                                                                                                                                                                                                                                                                                                                                                                                                                                                                                                                                                                                                                                                                                                                                                                                                                                                                                                                                                                                                                                                                                                                                                                                                                                                                                                                                                                                                                                                                                                                                                                                        |
|--------|-----|--------------------------------------------------------------------------------------------------------------------------------------------------------------------------------------------------------------------------------------------------------------------------------------------------------------------------------------------------------------------------------------------------------------------------------------------------------------------------------------------------------------------------------------------------------------------------------------------------------------------------------------------------------------------------------------------------------------------------------------------------------------------------------------------------------------------------------------------------------------------------------------------------------------------------------------------------------------------------------------------------------------------------------------------------------------------------------------------------------------------------------------------------------------------------------------------------------------------------------------------------------------------------------------------------------------------------------------------------------------------------------------------------------------------------------------------------------------------------------------------------------------------------------------------------------------------------------------------------------------------------------------------------------------------------------------------------------------------------------------------------------------------------------------------------------------------------------------------------------------------------------------------------------------------------------------------------------------------------------------------------------------------------------------------------------------------------------------------------------|
| P23560 | 294 | 24490534;23914898;23884949;23731762;23583688;23581453;23349859;23344852;23257628;23182350;23174180;23131414;23036616;23022460;22982152;22981449;22959240;22952613;22917619;22911773;22801282;22699902;22683506;22650045;22650042;22650041;22650040;22650038;22650037;22648027;22579680;22573254;22531936;22515203;22453521;22450230;22423083;22384207;22348141;22326790;22266141;22244304;22211901;22178331;22145921;22130565;22027236;21888482;21752551;21559863;21476782;21430166;21411654;21358740;21310212;21308793;21283639;21209491;21195072;21083432;20933583;20869112;20851742;20846445;20839450;20838921;20719091;20716462;20660255;20444938;20354783;20226152;20209974;20190766;20190624;20144886;20083190;20079352;20029964;19961582;19812967;19940189;19923273;19908250;19845866;19788572;19784741;19768787;19756447;19703592;19626995;19545610;19530162;19489718;19476208;19462232;19428687;22009833;19344636;19318112;19290803;19222991;19203225;19182380;19170182;19143246;19138107;19069631;19054721;18973595;18760313;18672032;18672025;18585708;18585435;18484898;18440711;18438913;18320028;18305238;18077567;18001204;17928316;17913768;17898225;17885772;17881483;17719180;17671987;17522325;17459471;17439352;17439351;17376002;17376001;17221884;17083989;17055159;16938843;16924202;16909619;16786574;16718733;16689666;16671480;16632872;16632552;16631308;16462594;16460709;16367769;16288464;16179548;16102815;16099038;16099032;16049170;16022868;16010451;15901762;15899240;15869943;15862959;15858411;15707984;15665609;15665420;15649491;15639807;15485774;15464279;15296835;15236239;15193526;15129166;15115607;15099674;15069022;15006710;14966352;14753473;14697859;14694501;14637085;14637084;14598294;14515351;14512160;12904465;12895449;12821376;12781049;12774239;12676157;12658441;12429228;12353221;12189689;12173755;12165137;12099279;12009779;11867727;11853017;11852178;11769614;11585248;11573989;11532245;11450046;11450028;11430880;11421586;11331375;11358454;11284549;11241740;11186234;11168530;11161589;11114257;11104504;11077420;11026506;109936 |
| P23582 | 1   | 17061258                                                                                                                                                                                                                                                                                                                                                                                                                                                                                                                                                                                                                                                                                                                                                                                                                                                                                                                                                                                                                                                                                                                                                                                                                                                                                                                                                                                                                                                                                                                                                                                                                                                                                                                                                                                                                                                                                                                                                                                                                                                                                               |
| P23759 | 3   | 22644570;20213470;16447751                                                                                                                                                                                                                                                                                                                                                                                                                                                                                                                                                                                                                                                                                                                                                                                                                                                                                                                                                                                                                                                                                                                                                                                                                                                                                                                                                                                                                                                                                                                                                                                                                                                                                                                                                                                                                                                                                                                                                                                                                                                                             |
| P23760 | 1   | 21710609                                                                                                                                                                                                                                                                                                                                                                                                                                                                                                                                                                                                                                                                                                                                                                                                                                                                                                                                                                                                                                                                                                                                                                                                                                                                                                                                                                                                                                                                                                                                                                                                                                                                                                                                                                                                                                                                                                                                                                                                                                                                                               |
| P23975 | 1   | 16143650                                                                                                                                                                                                                                                                                                                                                                                                                                                                                                                                                                                                                                                                                                                                                                                                                                                                                                                                                                                                                                                                                                                                                                                                                                                                                                                                                                                                                                                                                                                                                                                                                                                                                                                                                                                                                                                                                                                                                                                                                                                                                               |
| P24071 | 1   | 23299262                                                                                                                                                                                                                                                                                                                                                                                                                                                                                                                                                                                                                                                                                                                                                                                                                                                                                                                                                                                                                                                                                                                                                                                                                                                                                                                                                                                                                                                                                                                                                                                                                                                                                                                                                                                                                                                                                                                                                                                                                                                                                               |
| P24385 | 3   | 23775067;22510563;12666113                                                                                                                                                                                                                                                                                                                                                                                                                                                                                                                                                                                                                                                                                                                                                                                                                                                                                                                                                                                                                                                                                                                                                                                                                                                                                                                                                                                                                                                                                                                                                                                                                                                                                                                                                                                                                                                                                                                                                                                                                                                                             |
| P24394 | 1   | 20623539                                                                                                                                                                                                                                                                                                                                                                                                                                                                                                                                                                                                                                                                                                                                                                                                                                                                                                                                                                                                                                                                                                                                                                                                                                                                                                                                                                                                                                                                                                                                                                                                                                                                                                                                                                                                                                                                                                                                                                                                                                                                                               |
| P24821 | 9   | 22473292;21443931;20606643;15892123;15592854;15341588;12526031;11085900;9285520                                                                                                                                                                                                                                                                                                                                                                                                                                                                                                                                                                                                                                                                                                                                                                                                                                                                                                                                                                                                                                                                                                                                                                                                                                                                                                                                                                                                                                                                                                                                                                                                                                                                                                                                                                                                                                                                                                                                                                                                                        |
| P24941 | 1   | 21710280                                                                                                                                                                                                                                                                                                                                                                                                                                                                                                                                                                                                                                                                                                                                                                                                                                                                                                                                                                                                                                                                                                                                                                                                                                                                                                                                                                                                                                                                                                                                                                                                                                                                                                                                                                                                                                                                                                                                                                                                                                                                                               |
| P25024 | 3   | 20877331;17601981;17601981                                                                                                                                                                                                                                                                                                                                                                                                                                                                                                                                                                                                                                                                                                                                                                                                                                                                                                                                                                                                                                                                                                                                                                                                                                                                                                                                                                                                                                                                                                                                                                                                                                                                                                                                                                                                                                                                                                                                                                                                                                                                             |
| P25025 | 3   | 17601981;20877331;17601981                                                                                                                                                                                                                                                                                                                                                                                                                                                                                                                                                                                                                                                                                                                                                                                                                                                                                                                                                                                                                                                                                                                                                                                                                                                                                                                                                                                                                                                                                                                                                                                                                                                                                                                                                                                                                                                                                                                                                                                                                                                                             |
| P25063 | 3   | 20806064;19962782;19458237                                                                                                                                                                                                                                                                                                                                                                                                                                                                                                                                                                                                                                                                                                                                                                                                                                                                                                                                                                                                                                                                                                                                                                                                                                                                                                                                                                                                                                                                                                                                                                                                                                                                                                                                                                                                                                                                                                                                                                                                                                                                             |
| P25098 | 1   | 23359120                                                                                                                                                                                                                                                                                                                                                                                                                                                                                                                                                                                                                                                                                                                                                                                                                                                                                                                                                                                                                                                                                                                                                                                                                                                                                                                                                                                                                                                                                                                                                                                                                                                                                                                                                                                                                                                                                                                                                                                                                                                                                               |
| P25100 | 2   | 23583569;23583569                                                                                                                                                                                                                                                                                                                                                                                                                                                                                                                                                                                                                                                                                                                                                                                                                                                                                                                                                                                                                                                                                                                                                                                                                                                                                                                                                                                                                                                                                                                                                                                                                                                                                                                                                                                                                                                                                                                                                                                                                                                                                      |
| P25103 | 9   | 23564154;18513129;17559837;17314299;15922485;15135936;15082150;8207481;20096457                                                                                                                                                                                                                                                                                                                                                                                                                                                                                                                                                                                                                                                                                                                                                                                                                                                                                                                                                                                                                                                                                                                                                                                                                                                                                                                                                                                                                                                                                                                                                                                                                                                                                                                                                                                                                                                                                                                                                                                                                        |
| P25105 | 2   | 8758444;8762548                                                                                                                                                                                                                                                                                                                                                                                                                                                                                                                                                                                                                                                                                                                                                                                                                                                                                                                                                                                                                                                                                                                                                                                                                                                                                                                                                                                                                                                                                                                                                                                                                                                                                                                                                                                                                                                                                                                                                                                                                                                                                        |
| P25116 | 5   | 23832758;23647384;15307903;11186232;23832758                                                                                                                                                                                                                                                                                                                                                                                                                                                                                                                                                                                                                                                                                                                                                                                                                                                                                                                                                                                                                                                                                                                                                                                                                                                                                                                                                                                                                                                                                                                                                                                                                                                                                                                                                                                                                                                                                                                                                                                                                                                           |



|        |    |                                                                                                                                                                                                                                                                                                                                                                                                                                                                           |
|--------|----|---------------------------------------------------------------------------------------------------------------------------------------------------------------------------------------------------------------------------------------------------------------------------------------------------------------------------------------------------------------------------------------------------------------------------------------------------------------------------|
| P25391 | 52 | 22993437;22236767;21783247;21092402;20818775;20799884;20643907;20206381;20053907;19768787;19196078;19163037;19144400;18786615;18647603;18385339;18373484;19845152;18083223;17611274;17597120;17570475;17503492;17466943;17314203;16987227;16774471;16500703;16287096;16102813;15174067;14561854;12826801;12592689;12589929;12440376;11920709;11771939;11771937;11356383;10630189;10586102;9878200;9486767;9417833;9301195;8981236;7753403;7859097;8457890;1690226;3053227 |
| P25445 | 26 | 23487751;23196718;22260324;22038545;21181266;19469692;19120440;19006686;17703359;17518537;17357496;16689665;16629620;16202410;15567326;15223929;15004554;11311801;11302628;11208917;10912923;22038545;21181266;17518537;10912923;23935974                                                                                                                                                                                                                                 |
| P25713 | 2  | 21815784;21294159                                                                                                                                                                                                                                                                                                                                                                                                                                                         |
| P25874 | 1  | 22865656                                                                                                                                                                                                                                                                                                                                                                                                                                                                  |
| P25942 | 2  | 19469692;15447673                                                                                                                                                                                                                                                                                                                                                                                                                                                         |
| P26367 | 3  | 22473852;22469052;19955358                                                                                                                                                                                                                                                                                                                                                                                                                                                |
| P26441 | 32 | 23055522;23207758;22065254;21918888;21407803;21157914;20181590;19620993;18803859;18615534;18581269;17610915;17044031;16005441;14715147;12589929;11331375;11358454;11241740;10923678;10683293;10579585;10486182;10369555;10212315;9878195;9835219;9651218;9417827;9058319;9000447;8457882                                                                                                                                                                                  |
| P26447 | 1  | 15350649                                                                                                                                                                                                                                                                                                                                                                                                                                                                  |
| P27169 | 2  | 12897486;12382130                                                                                                                                                                                                                                                                                                                                                                                                                                                         |
| P27348 | 1  | 23177959                                                                                                                                                                                                                                                                                                                                                                                                                                                                  |
| P27361 | 43 | 15668227;22865681;19109493;24042200;23832758;23647384;22515203;22027236;21355419;20933583;20830289;20707645;20067580;19672039;19469685;19090911;18948848;18180375;17329433;16978658;16888810;16513110;16478624;16460709;15922485;15668227;15229242;23361876;22733360;22634758;21310020;20536940;20444938;20381564;19383246;19196180;19090911;18630599;17329433;15707984;11031088;19855390;23647384                                                                        |
| P27695 | 1  | 12563220                                                                                                                                                                                                                                                                                                                                                                                                                                                                  |
| P27815 | 5  | 23028463;22865690;21355819;18455876;23028463                                                                                                                                                                                                                                                                                                                                                                                                                              |
| P27930 | 3  | 19932745;17382514;11565605                                                                                                                                                                                                                                                                                                                                                                                                                                                |
| P27986 | 15 | 22930444;21720761;21496122;20132484;20070863;19800972;18785877;17611275;17457363;16460709;15668227;20585375;18785877;17703359;17457363                                                                                                                                                                                                                                                                                                                                    |
| P28221 | 3  | 23360270;15152026;23221401                                                                                                                                                                                                                                                                                                                                                                                                                                                |
| P28222 | 5  | 23360270;21653728;15152026;23221401;22227062                                                                                                                                                                                                                                                                                                                                                                                                                              |
| P28223 | 35 | 22227062;23360270;23337537;23248270;23221402;22227062;22056918;21272578;21211552;20698759;20085755;17059818;16760346;15772352;15716627;11717232;11358440;23337537;23159275;21036396;12426040;23481546;21653706;20861436;16707714;15892603;15380867;15275776;14622228;12193190;10407057;7957735;7964712;7683713;1830095                                                                                                                                                    |
| P28329 | 29 | 23859181;23500094;23184186;22579680;22445934;20719091;20698759;20384775;19318112;18253945;17084537;16774476;16632872;16487151;15862959;15476702;11939502;11776060;11398181;11391643;10384258;10025688;9749747;9392042;8931012;9165429;7885718;1933308;3944881                                                                                                                                                                                                             |

|        |     |                                                                                                                                                                                                                                                                                                                                                                                                                                                                                                                                                                                                                                                                                                                                                                                                                                                                                                                                                                                                                                                                                                                                                                                                                                 |
|--------|-----|---------------------------------------------------------------------------------------------------------------------------------------------------------------------------------------------------------------------------------------------------------------------------------------------------------------------------------------------------------------------------------------------------------------------------------------------------------------------------------------------------------------------------------------------------------------------------------------------------------------------------------------------------------------------------------------------------------------------------------------------------------------------------------------------------------------------------------------------------------------------------------------------------------------------------------------------------------------------------------------------------------------------------------------------------------------------------------------------------------------------------------------------------------------------------------------------------------------------------------|
| P28335 | 33  | 22227062;23337537;23159275;21056396;12426040;23481546;21653706;20861436;16707714;15892603;15380867;15275776;14622228;12193190;10407057;7957735;7964712;7683713;1830095;23360270;23337537;23159333;22993431;20980537;20512126;19840787;18045717;16914121;16760346;15649492;11717232;11358463;11258440                                                                                                                                                                                                                                                                                                                                                                                                                                                                                                                                                                                                                                                                                                                                                                                                                                                                                                                            |
| P28482 | 48  | 15668227;22865681;24042200;23852758;23647384;22515203;22027236;213553419;20933583;20830289;20707645;20067580;19672039;19469685;19090911;18948848;18180375;17329433;16978658;16888810;16513110;16478624;16460709;15922485;15668227;15229242;23361876;22733360;22634758;21310020;20536940;20444938;20381564;19383246;19196180;19090911;18630599;17329433;15707984;11031088;22027236;20943915;20849836;20067580;18180375;17329433;19855300;23647384                                                                                                                                                                                                                                                                                                                                                                                                                                                                                                                                                                                                                                                                                                                                                                                |
| P28562 | 2   | 19383246;18630599                                                                                                                                                                                                                                                                                                                                                                                                                                                                                                                                                                                                                                                                                                                                                                                                                                                                                                                                                                                                                                                                                                                                                                                                               |
| P28702 | 4   | 17201484;16420438;17239557;16420438                                                                                                                                                                                                                                                                                                                                                                                                                                                                                                                                                                                                                                                                                                                                                                                                                                                                                                                                                                                                                                                                                                                                                                                             |
| P28799 | 2   | 20012633;19946692                                                                                                                                                                                                                                                                                                                                                                                                                                                                                                                                                                                                                                                                                                                                                                                                                                                                                                                                                                                                                                                                                                                                                                                                               |
| P28906 | 19  | 23632234;23627822;22145921;20374199;20029964;19309047;18583926;19364066;18088553;17666954;17618991;17610376;16929981;15790679;15129757;15052772;12794745;11424189;16929981                                                                                                                                                                                                                                                                                                                                                                                                                                                                                                                                                                                                                                                                                                                                                                                                                                                                                                                                                                                                                                                      |
| P28907 | 1   | 16929981                                                                                                                                                                                                                                                                                                                                                                                                                                                                                                                                                                                                                                                                                                                                                                                                                                                                                                                                                                                                                                                                                                                                                                                                                        |
| P29017 | 1   | 21599492                                                                                                                                                                                                                                                                                                                                                                                                                                                                                                                                                                                                                                                                                                                                                                                                                                                                                                                                                                                                                                                                                                                                                                                                                        |
| P29274 | 21  | 21486435;20385073;19407255;19295488;18305238;17853654;17177231;16777350;16506468;16488692;15589516;17559837;17177231;14992338;12596519;12207572;11320597;11170727;10784116;9842828;9535120                                                                                                                                                                                                                                                                                                                                                                                                                                                                                                                                                                                                                                                                                                                                                                                                                                                                                                                                                                                                                                      |
| P29279 | 1   | 15796357                                                                                                                                                                                                                                                                                                                                                                                                                                                                                                                                                                                                                                                                                                                                                                                                                                                                                                                                                                                                                                                                                                                                                                                                                        |
| P29320 | 4   | 16083359;12075988;20949525;12075988                                                                                                                                                                                                                                                                                                                                                                                                                                                                                                                                                                                                                                                                                                                                                                                                                                                                                                                                                                                                                                                                                                                                                                                             |
| P29371 | 3   | 20096457;17907839;8207481                                                                                                                                                                                                                                                                                                                                                                                                                                                                                                                                                                                                                                                                                                                                                                                                                                                                                                                                                                                                                                                                                                                                                                                                       |
| P29373 | 1   | 16688771                                                                                                                                                                                                                                                                                                                                                                                                                                                                                                                                                                                                                                                                                                                                                                                                                                                                                                                                                                                                                                                                                                                                                                                                                        |
| P29459 | 4   | 22420033;18438913;18322000;14760011                                                                                                                                                                                                                                                                                                                                                                                                                                                                                                                                                                                                                                                                                                                                                                                                                                                                                                                                                                                                                                                                                                                                                                                             |
| P29460 | 4   | 22420033;18438913;18322000;14760011                                                                                                                                                                                                                                                                                                                                                                                                                                                                                                                                                                                                                                                                                                                                                                                                                                                                                                                                                                                                                                                                                                                                                                                             |
| P29466 | 6   | 22733360;22378878;18367607;13678663;12837623;10938439                                                                                                                                                                                                                                                                                                                                                                                                                                                                                                                                                                                                                                                                                                                                                                                                                                                                                                                                                                                                                                                                                                                                                                           |
| P29474 | 134 | 23135205;21496122;20141964;18400399;18096601;17287083;16786429;16776360;16179549;15895828;15036352;14644473;12232549;11835747;11834310;10455303;8903674;7530816;17618976;15895828;11834310;10921077;23731227;23700789;23688865;23659940;23135205;22748825;22125095;22002544;22000862;21626169;21596101;20633123;20468054;20382225;19741488;19675280;19651280;19418456;19291395;19056384;19026989;18855939;18096601;17712576;17645692;17618976;17484972;17385265;17353913;17287083;17258865;17217414;17017921;16978658;16791086;16786429;16703907;16671477;16246329;16179549;16100462;15895828;15640758;15486490;15353953;15335103;15229242;15036611;15036352;14993064;14767765;14753478;14753477;14666020;14644473;12903514;12865221;12810381;12713641;12675973;12490011;12402380;12232549;12133546;12042098;11844273;11835747;11835739;11834310;11453434;11427303;11425438;11424948;11253169;11200245;11191842;11146113;11068337;11043549;11031095;10984543;10928969;10925216;10923399;10790883;10697245;10686069;10486182;10471208;10455303;10393880;9871452;9871451;9848481;9795113;9760142;9507944;10921077;9416300;9208207;8880855;8863192;8791233;8710182;8861107;8903674;7478189;7753574;7525335;7530816;7687046;7684000 |

|        |     |                                                                                                                                                                                                                                                                                                                                                                                                                                                                                                                                                                                                                                                                                                                                                                                                                                                                                                                                                                                                                                                                                                                                                                                                                                                                                                                                                                                                                                                     |
|--------|-----|-----------------------------------------------------------------------------------------------------------------------------------------------------------------------------------------------------------------------------------------------------------------------------------------------------------------------------------------------------------------------------------------------------------------------------------------------------------------------------------------------------------------------------------------------------------------------------------------------------------------------------------------------------------------------------------------------------------------------------------------------------------------------------------------------------------------------------------------------------------------------------------------------------------------------------------------------------------------------------------------------------------------------------------------------------------------------------------------------------------------------------------------------------------------------------------------------------------------------------------------------------------------------------------------------------------------------------------------------------------------------------------------------------------------------------------------------------|
| P29475 | 160 | 17618976;15895828;11834310;10921077;23135205;22000862;21626169;21596101;21145575;20633123;19931630;19291395;18855939;18556138;18219571;18074109;18053028;17500094;17454396;17287083;17258865;16786429;16776360;16774476;16671477;16246329;16198696;16179549;16095570;15895828;15036352;14753477;14644473;12713641;12490011;11835747;11200245;11045565;10686069;9871452;9871451;9416300;9208207;8880855;8861107;7525335;7530816;21145575;23731227;23700789;23688865;23659940;23135205;22748825;22125095;22002544;22000862;21626169;21596101;20633123;20468054;20382225;19741488;19675280;19651280;19418456;19291395;19056384;19026989;18855939;18096601;17712576;17645692;17618976;17484972;17385265;17353913;17287083;17258865;17217414;17017921;16978658;16791086;16786429;16703907;16671477;16246329;16179549;16100462;15895828;15640758;15486490;15353953;15335103;15229242;15036611;15036352;14993064;14767765;14753478;14753477;14666020;14644473;12903514;12865221;12810381;12713641;12675973;12490011;12402380;12232549;12133546;12042098;11844273;11835747;11835739;11834310;11453434;11427303;11425438;11424948;11253169;11200245;11191842;11146113;11068337;11043549;11031095;10984543;10928969;10925216;10923399;10790883;10697245;10686069;10486182;10471208;10455303;10393880;9871452;9871451;9848481;9795113;9760142;9507944;10921077;9416300;9208207;8880855;8863192;8791233;8710182;8861107;8903674;7478189;7753574;7525335;7530816 |
| P29803 | 4   | 20438613;20392143;19119913;2352011                                                                                                                                                                                                                                                                                                                                                                                                                                                                                                                                                                                                                                                                                                                                                                                                                                                                                                                                                                                                                                                                                                                                                                                                                                                                                                                                                                                                                  |
| P29972 | 1   | 21092735                                                                                                                                                                                                                                                                                                                                                                                                                                                                                                                                                                                                                                                                                                                                                                                                                                                                                                                                                                                                                                                                                                                                                                                                                                                                                                                                                                                                                                            |
| P30041 | 2   | 21187959;21187959                                                                                                                                                                                                                                                                                                                                                                                                                                                                                                                                                                                                                                                                                                                                                                                                                                                                                                                                                                                                                                                                                                                                                                                                                                                                                                                                                                                                                                   |
| P30043 | 15  | 23579633;21376061;17584182;15672686;15488309;14993064;11532430;10925216;10790883;10707844;10686069;10471208;9836263;9760142;8710182                                                                                                                                                                                                                                                                                                                                                                                                                                                                                                                                                                                                                                                                                                                                                                                                                                                                                                                                                                                                                                                                                                                                                                                                                                                                                                                 |
| P30405 | 1   | 15573402                                                                                                                                                                                                                                                                                                                                                                                                                                                                                                                                                                                                                                                                                                                                                                                                                                                                                                                                                                                                                                                                                                                                                                                                                                                                                                                                                                                                                                            |
| P30411 | 2   | 18255230;22862305                                                                                                                                                                                                                                                                                                                                                                                                                                                                                                                                                                                                                                                                                                                                                                                                                                                                                                                                                                                                                                                                                                                                                                                                                                                                                                                                                                                                                                   |
| P30519 | 3   | 20945816;14753474;11450046                                                                                                                                                                                                                                                                                                                                                                                                                                                                                                                                                                                                                                                                                                                                                                                                                                                                                                                                                                                                                                                                                                                                                                                                                                                                                                                                                                                                                          |
| P30531 | 1   | 20059302                                                                                                                                                                                                                                                                                                                                                                                                                                                                                                                                                                                                                                                                                                                                                                                                                                                                                                                                                                                                                                                                                                                                                                                                                                                                                                                                                                                                                                            |
| P30542 | 22  | 20065990;19651244;18289533;16572566;15893424;15589516;14992338;12821393;12426040;12207572;11320597;9535120;17559837;17177231;14992338;12596519;12207572;11320597;11170727;10784116;9842828;9535120                                                                                                                                                                                                                                                                                                                                                                                                                                                                                                                                                                                                                                                                                                                                                                                                                                                                                                                                                                                                                                                                                                                                                                                                                                                  |
| P30556 | 1   | 23174180                                                                                                                                                                                                                                                                                                                                                                                                                                                                                                                                                                                                                                                                                                                                                                                                                                                                                                                                                                                                                                                                                                                                                                                                                                                                                                                                                                                                                                            |
| P30926 | 8   | 18855939;18888810;18725220;18710050;18694209;18155227;11554589;9500012                                                                                                                                                                                                                                                                                                                                                                                                                                                                                                                                                                                                                                                                                                                                                                                                                                                                                                                                                                                                                                                                                                                                                                                                                                                                                                                                                                              |
| P30939 | 1   | 21653728                                                                                                                                                                                                                                                                                                                                                                                                                                                                                                                                                                                                                                                                                                                                                                                                                                                                                                                                                                                                                                                                                                                                                                                                                                                                                                                                                                                                                                            |
| P30990 | 1   | 2426476                                                                                                                                                                                                                                                                                                                                                                                                                                                                                                                                                                                                                                                                                                                                                                                                                                                                                                                                                                                                                                                                                                                                                                                                                                                                                                                                                                                                                                             |
| P31152 | 15  | 22865681;23361876;22733360;22634758;21310020;20536940;20444938;20381564;19383246;19196180;19090911;18630599;17329433;15707984;11031088                                                                                                                                                                                                                                                                                                                                                                                                                                                                                                                                                                                                                                                                                                                                                                                                                                                                                                                                                                                                                                                                                                                                                                                                                                                                                                              |
| P31371 | 1   | 10833309                                                                                                                                                                                                                                                                                                                                                                                                                                                                                                                                                                                                                                                                                                                                                                                                                                                                                                                                                                                                                                                                                                                                                                                                                                                                                                                                                                                                                                            |
| P31645 | 7   | 22993431;21211552;19840787;18825396;16806182;12061865;11532245                                                                                                                                                                                                                                                                                                                                                                                                                                                                                                                                                                                                                                                                                                                                                                                                                                                                                                                                                                                                                                                                                                                                                                                                                                                                                                                                                                                      |
| P31749 | 32  | 20585375;18785877;17705559;17457363;24042200;20678995;19945951;22255859;20678995;22982298;22865656;22409448;22253859;21970623;21496122;20678995;20585375;19533653;19176818;19109493;18785877;18768685;18305238;18236467;17885021;17553847;17457363;17233289;16957585;16511963;15896972;20678995                                                                                                                                                                                                                                                                                                                                                                                                                                                                                                                                                                                                                                                                                                                                                                                                                                                                                                                                                                                                                                                                                                                                                     |
| P31751 | 24  | 22253859;20078995;22982298;22865656;22409448;22253859;21970623;21496122;20678995;20585375;19533653;19176818;19109493;18785877;18768685;18305238;18236467;17885021;17553847;17457363;17233289;16957585;16511963;15896972                                                                                                                                                                                                                                                                                                                                                                                                                                                                                                                                                                                                                                                                                                                                                                                                                                                                                                                                                                                                                                                                                                                                                                                                                             |
| P31946 | 1   | 23177959                                                                                                                                                                                                                                                                                                                                                                                                                                                                                                                                                                                                                                                                                                                                                                                                                                                                                                                                                                                                                                                                                                                                                                                                                                                                                                                                                                                                                                            |

|        |     |                                                                                                                                                                                                                                                                                                                                                                                                                                                                                                                                                                                                                                                                                                                                                                                                                                                                                                                                                                                                                                                                                                                                                                                                                                                                                    |
|--------|-----|------------------------------------------------------------------------------------------------------------------------------------------------------------------------------------------------------------------------------------------------------------------------------------------------------------------------------------------------------------------------------------------------------------------------------------------------------------------------------------------------------------------------------------------------------------------------------------------------------------------------------------------------------------------------------------------------------------------------------------------------------------------------------------------------------------------------------------------------------------------------------------------------------------------------------------------------------------------------------------------------------------------------------------------------------------------------------------------------------------------------------------------------------------------------------------------------------------------------------------------------------------------------------------|
| P31949 | 1   | 21655070                                                                                                                                                                                                                                                                                                                                                                                                                                                                                                                                                                                                                                                                                                                                                                                                                                                                                                                                                                                                                                                                                                                                                                                                                                                                           |
| P31994 | 1   | 22233298                                                                                                                                                                                                                                                                                                                                                                                                                                                                                                                                                                                                                                                                                                                                                                                                                                                                                                                                                                                                                                                                                                                                                                                                                                                                           |
| P32004 | 23  | 23049984;22815920;22497349;22431726;21671795;21445247;21337374;19909742;19861493;19458237;19170182;19059398;17611275;17438016;16860320;16630048;16083356;14577865;14561854;12115695;11606629;10998106;10495438                                                                                                                                                                                                                                                                                                                                                                                                                                                                                                                                                                                                                                                                                                                                                                                                                                                                                                                                                                                                                                                                     |
| P32119 | 1   | 16586436                                                                                                                                                                                                                                                                                                                                                                                                                                                                                                                                                                                                                                                                                                                                                                                                                                                                                                                                                                                                                                                                                                                                                                                                                                                                           |
| P32239 | 3   | 19619609;11457525;10097004                                                                                                                                                                                                                                                                                                                                                                                                                                                                                                                                                                                                                                                                                                                                                                                                                                                                                                                                                                                                                                                                                                                                                                                                                                                         |
| P32245 | 9   | 17627526;16550325;16179548;15662938;14753476;10719082;10391370;10225218;8971834                                                                                                                                                                                                                                                                                                                                                                                                                                                                                                                                                                                                                                                                                                                                                                                                                                                                                                                                                                                                                                                                                                                                                                                                    |
| P32246 | 4   | 20155816;21332278;21265596;12111830                                                                                                                                                                                                                                                                                                                                                                                                                                                                                                                                                                                                                                                                                                                                                                                                                                                                                                                                                                                                                                                                                                                                                                                                                                                |
| P32297 | 8   | 18855959;10888810;10725220;15710050;15094209;15155227;11554589;9500012                                                                                                                                                                                                                                                                                                                                                                                                                                                                                                                                                                                                                                                                                                                                                                                                                                                                                                                                                                                                                                                                                                                                                                                                             |
| P32754 | 6   | 20675200;18835424;11438395;11166985;9674552;3702563                                                                                                                                                                                                                                                                                                                                                                                                                                                                                                                                                                                                                                                                                                                                                                                                                                                                                                                                                                                                                                                                                                                                                                                                                                |
| P33151 | 1   | 19859984                                                                                                                                                                                                                                                                                                                                                                                                                                                                                                                                                                                                                                                                                                                                                                                                                                                                                                                                                                                                                                                                                                                                                                                                                                                                           |
| P33681 | 1   | 21599492                                                                                                                                                                                                                                                                                                                                                                                                                                                                                                                                                                                                                                                                                                                                                                                                                                                                                                                                                                                                                                                                                                                                                                                                                                                                           |
| P33764 | 1   | 21539830                                                                                                                                                                                                                                                                                                                                                                                                                                                                                                                                                                                                                                                                                                                                                                                                                                                                                                                                                                                                                                                                                                                                                                                                                                                                           |
| P33993 | 2   | 23526403;23526403                                                                                                                                                                                                                                                                                                                                                                                                                                                                                                                                                                                                                                                                                                                                                                                                                                                                                                                                                                                                                                                                                                                                                                                                                                                                  |
| P34059 | 138 | 24478364;23879089;23839053;23804083;23790207;23731762;23596678;23531013;23520469;23186720;23098734;23061434;23022460;22934782;22917776;22836147;22827732;22728374;22650045;22650041;22650038;22650037;22629425;22579680;22497349;22465128;22420304;22193443;22159095;22114278;22042649;22016526;21946272;21885201;21855577;21848846;21753849;21697383;21630006;21596037;21574751;21490212;21310212;21215745;21046809;20855243;20846445;20839450;20673791;20620201;20620180;20599980;20558254;20552220;20536940;20534825;20419536;20354783;20179269;20134188;20130176;20087118;20079803;19940184;19935638;19884507;19788572;19768787;19761692;19675231;19668200;19659409;19545610;19255587;19192870;19143246;19109493;19005065;18930033;18795474;18486695;18373483;18353313;18320028;18314199;18221191;18158149;18001203;18000864;17970629;17936753;17913768;17719577;17540369;17495772;17439352;17329414;17099112;17083989;17050723;16965762;16924202;16837588;16705682;16632552;16624960;16367770;15716629;15689553;15514921;15307905;14960611;12821386;12821376;12781986;12617951;12440375;12435430;12115676;12009528;11948352;11769614;11450046;11450028;11186234;11026506;10790883;10630190;10486182;10212315;9878200;9871451;9840350;9699155;9772453;8594213;1333605;19940184 |
| P34130 | 48  | 23560280;23124646;23098734;21430166;21421025;20819171;20600515;20554000;20171177;19118106;18095482;17686909;17584113;16629625;16305315;14699980;12589927;12440384;12440372;12440358;11923434;10811391;10384258;9932426;9369296;9199395;8993706;22244304;21083432;17522325;15193526;12435430;12189689;11810020;11430880;10683293;9417827;8624719;7869082;1333605;15901762;15748877;15144859;15032708;10763505;10720616;9217092;7965063                                                                                                                                                                                                                                                                                                                                                                                                                                                                                                                                                                                                                                                                                                                                                                                                                                              |
| P34741 | 3   | 15033786;12115695;10933968                                                                                                                                                                                                                                                                                                                                                                                                                                                                                                                                                                                                                                                                                                                                                                                                                                                                                                                                                                                                                                                                                                                                                                                                                                                         |
| P34810 | 55  | 23614684;22801282;22220714;22213649;21740131;21355819;21334381;21298060;21161579;20656347;20623539;20155820;19946692;19141070;18926823;18840968;18808067;18316064;18294815;17993744;17882014;17671987;17503492;17071951;16890196;16774471;16689668;16581192;16305315;16211443;16187294;16155637;16100462;15993386;15880494;15610171;15605375;15351516;15182944;15009633;14966352;14588117;12499056;11585624;11146113;11045675;11018703;10383635;9582256;9562256;9417823;8989657;7957733;8450950;21970623                                                                                                                                                                                                                                                                                                                                                                                                                                                                                                                                                                                                                                                                                                                                                                           |

|        |     |                                                                                                                                                                                                                                                                                                                                                                                                                                                                                                                                                                                                                                                                                                                                                                                                                                                                                                                                                                                                                                                                                                                                                                                                                                                                                                                                                                                                                                                                                                                                                                                                                                                                                                                                                                                                                                                                                                                                                                                                                  |
|--------|-----|------------------------------------------------------------------------------------------------------------------------------------------------------------------------------------------------------------------------------------------------------------------------------------------------------------------------------------------------------------------------------------------------------------------------------------------------------------------------------------------------------------------------------------------------------------------------------------------------------------------------------------------------------------------------------------------------------------------------------------------------------------------------------------------------------------------------------------------------------------------------------------------------------------------------------------------------------------------------------------------------------------------------------------------------------------------------------------------------------------------------------------------------------------------------------------------------------------------------------------------------------------------------------------------------------------------------------------------------------------------------------------------------------------------------------------------------------------------------------------------------------------------------------------------------------------------------------------------------------------------------------------------------------------------------------------------------------------------------------------------------------------------------------------------------------------------------------------------------------------------------------------------------------------------------------------------------------------------------------------------------------------------|
| P34925 | 5   | 19473059;23320533;19473059;18701700;19473059                                                                                                                                                                                                                                                                                                                                                                                                                                                                                                                                                                                                                                                                                                                                                                                                                                                                                                                                                                                                                                                                                                                                                                                                                                                                                                                                                                                                                                                                                                                                                                                                                                                                                                                                                                                                                                                                                                                                                                     |
| P34947 | 1   | 23359120                                                                                                                                                                                                                                                                                                                                                                                                                                                                                                                                                                                                                                                                                                                                                                                                                                                                                                                                                                                                                                                                                                                                                                                                                                                                                                                                                                                                                                                                                                                                                                                                                                                                                                                                                                                                                                                                                                                                                                                                         |
| P34969 | 2   | 23481546;16836640                                                                                                                                                                                                                                                                                                                                                                                                                                                                                                                                                                                                                                                                                                                                                                                                                                                                                                                                                                                                                                                                                                                                                                                                                                                                                                                                                                                                                                                                                                                                                                                                                                                                                                                                                                                                                                                                                                                                                                                                |
| P34972 | 16  | 21815115;20055775;1955520;17045204;11249900;25152849;21970490;21554467;20920894;20156559;20035773;20214038;18930143;19248685;17045264;12822482                                                                                                                                                                                                                                                                                                                                                                                                                                                                                                                                                                                                                                                                                                                                                                                                                                                                                                                                                                                                                                                                                                                                                                                                                                                                                                                                                                                                                                                                                                                                                                                                                                                                                                                                                                                                                                                                   |
| P34998 | 1   | 20470804                                                                                                                                                                                                                                                                                                                                                                                                                                                                                                                                                                                                                                                                                                                                                                                                                                                                                                                                                                                                                                                                                                                                                                                                                                                                                                                                                                                                                                                                                                                                                                                                                                                                                                                                                                                                                                                                                                                                                                                                         |
| P35052 | 1   | 19843094                                                                                                                                                                                                                                                                                                                                                                                                                                                                                                                                                                                                                                                                                                                                                                                                                                                                                                                                                                                                                                                                                                                                                                                                                                                                                                                                                                                                                                                                                                                                                                                                                                                                                                                                                                                                                                                                                                                                                                                                         |
| P35225 | 3   | 22420033;22233298;21411654                                                                                                                                                                                                                                                                                                                                                                                                                                                                                                                                                                                                                                                                                                                                                                                                                                                                                                                                                                                                                                                                                                                                                                                                                                                                                                                                                                                                                                                                                                                                                                                                                                                                                                                                                                                                                                                                                                                                                                                       |
| P35226 | 1   | 19908289                                                                                                                                                                                                                                                                                                                                                                                                                                                                                                                                                                                                                                                                                                                                                                                                                                                                                                                                                                                                                                                                                                                                                                                                                                                                                                                                                                                                                                                                                                                                                                                                                                                                                                                                                                                                                                                                                                                                                                                                         |
| P35228 | 218 | 23820414;23088805;22981449;22825006;22708918;22542994;22255298;22150233;22125095;22072681;22002544;21940434;21922518;21854445;21787762;21656712;21626169;21529317;21383505;21355819;21190044;20799028;20423707;20370565;20210855;20176685;20109445;19891733;19741488;19519665;19416634;19295488;19183262;19141070;19026989;18948848;18855939;18665052;18628687;18367664;18322000;18255138;18197140;18187233;17945432;17918744;17892411;17712576;17704735;17645692;17500094;17418876;17382514;17287083;17181549;17017921;16978658;16786429;16776360;16703907;16648743;16601144;16506482;16303916;16184194;16100462;16041804;15895828;15671854;15640758;15618882;15605375;15567326;15520837;15486490;15335103;15229242;15036611;15009633;14753478;14662726;14656068;14644473;12865221;12810381;12713641;12680327;12675973;12490011;12232549;12042098;11835739;11834310;11453434;11393255;11342896;11170729;11146113;10697245;9729336;9547234;10921077;9000453;8863192;8903674;23731227;23700789;23688865;23659940;23135205;22748825;22125095;22002544;22000862;21626169;21596101;20633123;20468054;20382225;19741488;19675280;19651280;19418456;19291395;19056384;19026989;18855939;18096601;17712576;17645692;17618976;17484972;17385265;17353913;17287083;17258865;17217414;17017921;16978658;16791086;16786429;16703907;16671477;16246329;16179549;16100462;15895828;15640758;15486490;15353953;15335103;15229242;15036611;15036352;14993064;14767765;14753478;14753477;14666020;14644473;12903514;12865221;12810381;12713641;12675973;12490011;12402380;12232549;12133546;12042098;11844273;11835747;11835739;11834310;11453434;11427303;11425438;11424948;11253169;11200245;11191842;11146113;11068337;11043549;11031095;10984543;10928969;10925216;10923399;10790883;10697245;10686069;10486182;10471208;10455303;10393880;9871452;9871451;9848481;9795113;9760142;9507944;10921077;9416300;9208207;8880855;8863192;8791233;8710182;8861107;8903674;7478180;7752574;7525225;7520816;7687046;7684000;22688965 |
| P35321 | 3   | 22504113;12764110;11850458                                                                                                                                                                                                                                                                                                                                                                                                                                                                                                                                                                                                                                                                                                                                                                                                                                                                                                                                                                                                                                                                                                                                                                                                                                                                                                                                                                                                                                                                                                                                                                                                                                                                                                                                                                                                                                                                                                                                                                                       |
| P35348 | 18  | 23178151;22081708;21222499;21047936;20822463;16198708;16143650;15680702;15486013;1353386;1030656;21047936;1675858;758380;22275761;15211988;7620299;23583569                                                                                                                                                                                                                                                                                                                                                                                                                                                                                                                                                                                                                                                                                                                                                                                                                                                                                                                                                                                                                                                                                                                                                                                                                                                                                                                                                                                                                                                                                                                                                                                                                                                                                                                                                                                                                                                      |
| P35354 | 65  | 23901068;21935591;21781963;17184185;15319002;15293235;15141096;11107569;11063829;11032961;10393880;9872457;9000453;8657340;1588635;3143469;3418749;22878503;22150233;21933591;21922518;21784069;21383505;21375803;21355819;21138398;20382225;20091771;19831872;19519665;19056384;18926823;18751914;18384773;18036801;17918744;17901087;17892411;17329433;17184185;16648743;16601144;16303916;16182319;16041804;15885321;15596243;15447673;15319002;15312174;15182944;15179440;14970362;14588302;14522004;12664616;12664579;11336442;11170729;11063829;11032961;11029637;10393880;9886082;9872457                                                                                                                                                                                                                                                                                                                                                                                                                                                                                                                                                                                                                                                                                                                                                                                                                                                                                                                                                                                                                                                                                                                                                                                                                                                                                                                                                                                                                 |

|        |     |                                                                                                                                                                                                                                                                                                                                                                                                                                                                                                                                                                                                                                                                                                                                                                                                                                                                                                                                                                                                                                                                                                                                            |
|--------|-----|--------------------------------------------------------------------------------------------------------------------------------------------------------------------------------------------------------------------------------------------------------------------------------------------------------------------------------------------------------------------------------------------------------------------------------------------------------------------------------------------------------------------------------------------------------------------------------------------------------------------------------------------------------------------------------------------------------------------------------------------------------------------------------------------------------------------------------------------------------------------------------------------------------------------------------------------------------------------------------------------------------------------------------------------------------------------------------------------------------------------------------------------|
| P35367 | 1   | 16671478                                                                                                                                                                                                                                                                                                                                                                                                                                                                                                                                                                                                                                                                                                                                                                                                                                                                                                                                                                                                                                                                                                                                   |
| P35372 | 6   | 19585156;16476416;16360182;15982817;9583756;8584148                                                                                                                                                                                                                                                                                                                                                                                                                                                                                                                                                                                                                                                                                                                                                                                                                                                                                                                                                                                                                                                                                        |
| P35408 | 1   | 20970752                                                                                                                                                                                                                                                                                                                                                                                                                                                                                                                                                                                                                                                                                                                                                                                                                                                                                                                                                                                                                                                                                                                                   |
| P35580 | 2   | 22236775;19623632                                                                                                                                                                                                                                                                                                                                                                                                                                                                                                                                                                                                                                                                                                                                                                                                                                                                                                                                                                                                                                                                                                                          |
| P35590 | 1   | 19859984                                                                                                                                                                                                                                                                                                                                                                                                                                                                                                                                                                                                                                                                                                                                                                                                                                                                                                                                                                                                                                                                                                                                   |
| P35613 | 1   | 17184186                                                                                                                                                                                                                                                                                                                                                                                                                                                                                                                                                                                                                                                                                                                                                                                                                                                                                                                                                                                                                                                                                                                                   |
| P35638 | 9   | 22873727;22196867;21933012;21638341;21241777;19215662;17578450;1633360;6396563                                                                                                                                                                                                                                                                                                                                                                                                                                                                                                                                                                                                                                                                                                                                                                                                                                                                                                                                                                                                                                                             |
| P35716 | 1   | 20951776                                                                                                                                                                                                                                                                                                                                                                                                                                                                                                                                                                                                                                                                                                                                                                                                                                                                                                                                                                                                                                                                                                                                   |
| P35916 | 5   | 19319198;18773817;17409380;12927201;11029637                                                                                                                                                                                                                                                                                                                                                                                                                                                                                                                                                                                                                                                                                                                                                                                                                                                                                                                                                                                                                                                                                               |
| P35968 | 5   | 19319198;18773817;17409380;12927201;11029637                                                                                                                                                                                                                                                                                                                                                                                                                                                                                                                                                                                                                                                                                                                                                                                                                                                                                                                                                                                                                                                                                               |
| P36507 | 4   | 21355419;20707645;18715715;17329433                                                                                                                                                                                                                                                                                                                                                                                                                                                                                                                                                                                                                                                                                                                                                                                                                                                                                                                                                                                                                                                                                                        |
| P36544 | 2   | 23184186;16888810                                                                                                                                                                                                                                                                                                                                                                                                                                                                                                                                                                                                                                                                                                                                                                                                                                                                                                                                                                                                                                                                                                                          |
| P36888 | 1   | 21539498                                                                                                                                                                                                                                                                                                                                                                                                                                                                                                                                                                                                                                                                                                                                                                                                                                                                                                                                                                                                                                                                                                                                   |
| P36894 | 3   | 21764678;21273111;21764678                                                                                                                                                                                                                                                                                                                                                                                                                                                                                                                                                                                                                                                                                                                                                                                                                                                                                                                                                                                                                                                                                                                 |
| P37198 | 1   | 22082874                                                                                                                                                                                                                                                                                                                                                                                                                                                                                                                                                                                                                                                                                                                                                                                                                                                                                                                                                                                                                                                                                                                                   |
| P37231 | 13  | 23569141;23374874;22947224;21889575;21819712;21206444;20350367;18628687;17981670;17433295;17167171;17073815;21740108                                                                                                                                                                                                                                                                                                                                                                                                                                                                                                                                                                                                                                                                                                                                                                                                                                                                                                                                                                                                                       |
| P38159 | 1   | 23180094                                                                                                                                                                                                                                                                                                                                                                                                                                                                                                                                                                                                                                                                                                                                                                                                                                                                                                                                                                                                                                                                                                                                   |
| P38936 | 2   | 17331604;11850458                                                                                                                                                                                                                                                                                                                                                                                                                                                                                                                                                                                                                                                                                                                                                                                                                                                                                                                                                                                                                                                                                                                          |
| P39060 | 1   | 17688061                                                                                                                                                                                                                                                                                                                                                                                                                                                                                                                                                                                                                                                                                                                                                                                                                                                                                                                                                                                                                                                                                                                                   |
| P39900 | 2   | 22798270;14602826                                                                                                                                                                                                                                                                                                                                                                                                                                                                                                                                                                                                                                                                                                                                                                                                                                                                                                                                                                                                                                                                                                                          |
| P39905 | 123 | 23360280;23124646;23098734;21430166;21421025;20819171;20600315;20554000;20171177;19118106;18095482;17686909;17584113;16629625;16305315;14699980;12589927;12440384;12440372;12440358;11923434;10811391;10384258;9932426;9369296;9199395;8993706;23916821;23659940;23536080;23500094;23344852;23186720;23076378;22981449;22840455;22801282;22342994;22244304;22178331;22137336;22085254;21451028;21316362;21316153;21308793;21083432;20925481;20851742;20719091;20419536;20334467;20193555;20132484;20005873;19812967;19940184;19845866;19784741;19476208;19293775;19240691;19170182;19164849;19069631;18774604;18703596;18436292;18367307;18295206;18077567;17702601;17666954;17578287;16906542;16839548;16774476;16671480;16187294;16038451;16022680;15671854;15640758;15640751;15635609;15618882;15514921;15380482;15363220;15094497;14694501;14691064;14651811;14608602;14598294;14552891;14552879;14515351;12817305;12781986;12589929;12482120;12125080;11331375;11358454;11117507;10923678;10683293;10624807;10583476;10486182;10212315;9699155;8786386;19940184;15901762;15748877;15144859;15032708;10763505;10720616;9217092;7965063 |
| P40189 | 8   | 23059820;20478501;18446011;10164194;10129964;15128857;15048924;20478501                                                                                                                                                                                                                                                                                                                                                                                                                                                                                                                                                                                                                                                                                                                                                                                                                                                                                                                                                                                                                                                                    |
| P40763 | 21  | 22815920;20155820;22715999;20161735;23904622;23274522;21833847;21375803;20187447;20005873;19831872;18615534;18614693;17131417;16890196;16783372;16417589;16230180;15716400;10762348;11028697                                                                                                                                                                                                                                                                                                                                                                                                                                                                                                                                                                                                                                                                                                                                                                                                                                                                                                                                               |
| P41143 | 3   | 17983769;16360182;9583756                                                                                                                                                                                                                                                                                                                                                                                                                                                                                                                                                                                                                                                                                                                                                                                                                                                                                                                                                                                                                                                                                                                  |
| P41145 | 12  | 20675200;17983769;16476416;16360182;14751594;14713862;9583756;9547096;7708296;1356430;2827851;2884046                                                                                                                                                                                                                                                                                                                                                                                                                                                                                                                                                                                                                                                                                                                                                                                                                                                                                                                                                                                                                                      |
| P41159 | 14  | 24060491;22815920;22777489;22536415;22118258;21112441;19777863;18209743;16213239;15281006;12556356;12519883;11128893;9013753                                                                                                                                                                                                                                                                                                                                                                                                                                                                                                                                                                                                                                                                                                                                                                                                                                                                                                                                                                                                               |
| P41221 | 4   | 21273111;19473059;19473059;19473059                                                                                                                                                                                                                                                                                                                                                                                                                                                                                                                                                                                                                                                                                                                                                                                                                                                                                                                                                                                                                                                                                                        |

|        |     |                                                                                                                                                                                                                                                                                                                                                                                                                                                                                                                                                                                                                                                                                                                                                                                                                                                                                                                                                                                                                                                                                        |
|--------|-----|----------------------------------------------------------------------------------------------------------------------------------------------------------------------------------------------------------------------------------------------------------------------------------------------------------------------------------------------------------------------------------------------------------------------------------------------------------------------------------------------------------------------------------------------------------------------------------------------------------------------------------------------------------------------------------------------------------------------------------------------------------------------------------------------------------------------------------------------------------------------------------------------------------------------------------------------------------------------------------------------------------------------------------------------------------------------------------------|
| P41231 | 2   | 20619335;21647706                                                                                                                                                                                                                                                                                                                                                                                                                                                                                                                                                                                                                                                                                                                                                                                                                                                                                                                                                                                                                                                                      |
| P41586 | 1   | 22674051                                                                                                                                                                                                                                                                                                                                                                                                                                                                                                                                                                                                                                                                                                                                                                                                                                                                                                                                                                                                                                                                               |
| P41594 | 15  | 22227062;21394541;19670441;16382209;16317045;16004983;15115597;11852976;11723176;11476590;9840766;19110202;16004983;11440816;11043525                                                                                                                                                                                                                                                                                                                                                                                                                                                                                                                                                                                                                                                                                                                                                                                                                                                                                                                                                  |
| P41595 | 16  | 23481546;21653706;20861436;16707714;15892603;15380867;15275776;14622228;12193190;10407057;7957735;7964712;7683713;1830095;23360270;20980537                                                                                                                                                                                                                                                                                                                                                                                                                                                                                                                                                                                                                                                                                                                                                                                                                                                                                                                                            |
| P41597 | 5   | 20155816;18338959;21265596;18338959;12111830                                                                                                                                                                                                                                                                                                                                                                                                                                                                                                                                                                                                                                                                                                                                                                                                                                                                                                                                                                                                                                           |
| P41743 | 2   | 22329943;22329943                                                                                                                                                                                                                                                                                                                                                                                                                                                                                                                                                                                                                                                                                                                                                                                                                                                                                                                                                                                                                                                                      |
| P42081 | 1   | 21599492                                                                                                                                                                                                                                                                                                                                                                                                                                                                                                                                                                                                                                                                                                                                                                                                                                                                                                                                                                                                                                                                               |
| P42224 | 2   | 21833847;19141070                                                                                                                                                                                                                                                                                                                                                                                                                                                                                                                                                                                                                                                                                                                                                                                                                                                                                                                                                                                                                                                                      |
| P42226 | 1   | 17301687                                                                                                                                                                                                                                                                                                                                                                                                                                                                                                                                                                                                                                                                                                                                                                                                                                                                                                                                                                                                                                                                               |
| P42229 | 4   | 11028697;19228956;17600519;10762348                                                                                                                                                                                                                                                                                                                                                                                                                                                                                                                                                                                                                                                                                                                                                                                                                                                                                                                                                                                                                                                    |
| P42261 | 30  | 23859181;22579680;21167847;20662840;19446017;18534577;16433440;15684654;15283995;12821375;12220704;10407012;22745823;22721766;21111028;20456005;20211179;19634126;18194440;17549753;15684654;15253803;14622710;12691384;11886824;11586111;10683288;10486193;10407058;8880851                                                                                                                                                                                                                                                                                                                                                                                                                                                                                                                                                                                                                                                                                                                                                                                                           |
| P42262 | 36  | 22745823;22721766;21111028;20456005;20211179;19634126;18194440;17549753;15684654;15253803;14622710;12691384;11886824;11586111;10683288;10486193;10407058;8880851;23859181;23386718;22579680;18971481;18534577;17559837;16433440;15857397;15684654;15283995;12821375;12220704;11374812;11259116;11160435;10686069;10407012;16198697                                                                                                                                                                                                                                                                                                                                                                                                                                                                                                                                                                                                                                                                                                                                                     |
| P42263 | 18  | 22745823;22721766;21111028;20456005;20211179;19634126;18194440;17549753;15684654;15253803;14622710;12691384;11886824;11586111;10683288;10486193;10407058;8880851                                                                                                                                                                                                                                                                                                                                                                                                                                                                                                                                                                                                                                                                                                                                                                                                                                                                                                                       |
| P42336 | 15  | 22930444;21720761;21496122;20132484;20070863;19800972;18785877;17611275;17457363;16460709;15668227;20585375;18785877;17703359;17457363                                                                                                                                                                                                                                                                                                                                                                                                                                                                                                                                                                                                                                                                                                                                                                                                                                                                                                                                                 |
| P42338 | 15  | 22930444;21720761;21496122;20132484;20070863;19800972;18785877;17611275;17457363;16460709;15668227;20585375;18785877;17703359;17457363                                                                                                                                                                                                                                                                                                                                                                                                                                                                                                                                                                                                                                                                                                                                                                                                                                                                                                                                                 |
| P42345 | 22  | 22253859;20678995;20678995;23981724;23726960;22980985;22895182;22865656;22504113;22253859;22123082;21806471;21720761;20694004;20187447;19533653;19176818;17885021;20678995;17885021;22123082;20694004                                                                                                                                                                                                                                                                                                                                                                                                                                                                                                                                                                                                                                                                                                                                                                                                                                                                                  |
| P42574 | 118 | 23855891;23731227;23526403;23499960;23494980;23274522;23215850;23196718;23180094;23054070;22986158;22848730;22749575;22573254;22453521;22450230;22427977;22426389;22409448;22342994;22295509;22289688;22220508;21922518;21807380;21645590;21394310;21336655;21144461;21111721;21039984;20970752;20708606;20466038;20444938;20385073;20382225;20117935;20091771;20067580;20059302;19859984;19782669;19716366;19545280;19429019;19376093;19120440;18827691;18772508;18722523;18378144;18354017;18307037;18219571;18156166;18008145;17917587;17892411;17880386;17706365;17703359;17698296;17564836;17518537;17512912;17465991;17357496;17236773;17023852;16902996;16638021;16581192;16263098;16256834;16122023;16099247;16083358;16042868;16038625;16029658;16005241;15995139;15992367;15795935;15576480;15453993;15307903;15115604;14999069;14588118;14570283;14507967;13678663;12837623;12815713;12794736;12738057;12568318;12535938;12429226;11968060;11831549;11810634;11597598;11565605;11517251;11379817;11311801;11085887;11007881;10938439;10426320;22244304;22700771;21748659;17 |
| P42771 | 1   | 19813107                                                                                                                                                                                                                                                                                                                                                                                                                                                                                                                                                                                                                                                                                                                                                                                                                                                                                                                                                                                                                                                                               |
| P42858 | 1   | 12969257                                                                                                                                                                                                                                                                                                                                                                                                                                                                                                                                                                                                                                                                                                                                                                                                                                                                                                                                                                                                                                                                               |

|        |    |                                                                                                                                                                                                                                                                                                                   |
|--------|----|-------------------------------------------------------------------------------------------------------------------------------------------------------------------------------------------------------------------------------------------------------------------------------------------------------------------|
| P42898 | 1  | 19853891                                                                                                                                                                                                                                                                                                          |
| P43003 | 9  | 22791629;21439271;20375134;20070863;18358622;19388351;17893916;11814437;11374812                                                                                                                                                                                                                                  |
| P43004 | 12 | 23639820;21882244;21620945;21488085;21439271;20070863;19323997;18358622;18194440;17893916;11814437;11374812                                                                                                                                                                                                       |
| P43005 | 3  | 21620945;21439271;11814437                                                                                                                                                                                                                                                                                        |
| P43115 | 3  | 22634758;20970752;17329433                                                                                                                                                                                                                                                                                        |
| P43146 | 5  | 22022865;18001205;16998900;16262652;15737738                                                                                                                                                                                                                                                                      |
| P43250 | 2  | 23979726;23359120                                                                                                                                                                                                                                                                                                 |
| P43354 | 2  | 17201484;9651546                                                                                                                                                                                                                                                                                                  |
| P43490 | 1  | 22490786                                                                                                                                                                                                                                                                                                          |
| P45452 | 1  | 22205935                                                                                                                                                                                                                                                                                                          |
| P45983 | 18 | 21824499;18293403;16005241;22821814;22426389;22409452;21671725;21596101;21336655;20107429;19295488;19090911;18209489;17880387;16930431;16417589;16005241;10331432                                                                                                                                                 |
| P45984 | 16 | 22821814;22426389;22409452;21671725;21596101;21550655;20107429;19295488;19090911;18209489;17880387;16930431;16417589;16005241;10331432;15716400                                                                                                                                                                   |
| P46013 | 5  | 23526403;23001399;22791629;21488085;19925583                                                                                                                                                                                                                                                                      |
| P46098 | 6  | 18798253;16049141;15275776;12610685;12560138;8749032                                                                                                                                                                                                                                                              |
| P46527 | 5  | 22930444;23386122;22930444;22510563;21229311                                                                                                                                                                                                                                                                      |
| P46531 | 14 | 23622458;22865656;22579680;22452482;22378895;21156172;20384775;16262629;11706559;10810480;9248556;7700587;2419108;22452482                                                                                                                                                                                        |
| P46663 | 3  | 17542507;22862305;17108828                                                                                                                                                                                                                                                                                        |
| P46821 | 1  | 17880387                                                                                                                                                                                                                                                                                                          |
| P46939 | 1  | 23727406                                                                                                                                                                                                                                                                                                          |
| P47712 | 15 | 22581384;21142140;20127525;18755070;17917587;16566026;16498630;15248295;11499402;8522975;7473799;19409102;19371144;19306380;10527456                                                                                                                                                                              |
| P47869 | 13 | 23542439;23332495;22449374;20203195;19358834;19225548;18845615;18206170;17376001;17046753;15157699;12618352;18495826                                                                                                                                                                                              |
| P47870 | 13 | 23542439;23332495;22449374;20203195;19358834;19225548;18845615;18206170;17376001;17046753;15157699;12618352;18495826                                                                                                                                                                                              |
| P47898 | 1  | 23360270                                                                                                                                                                                                                                                                                                          |
| P47900 | 1  | 21647706                                                                                                                                                                                                                                                                                                          |
| P47989 | 5  | 17535569;15610928;12423257;9000453;1649310                                                                                                                                                                                                                                                                        |
| P48023 | 34 | 22038545;21181266;17518537;10912923;23935974;23647386;23184030;22733360;22342994;21787762;21496122;21181266;20830289;20385073;20370565;20304963;20176685;20107429;19891733;19183262;19120440;18948848;18628687;18180375;17945432;17645692;17621255;17518537;16689665;15567326;15004554;11170729;10912923;11170729 |
| P48039 | 1  | 20626592                                                                                                                                                                                                                                                                                                          |
| P48058 | 27 | 22745823;22721766;21111028;20456005;20211179;19634126;18194440;17549753;15684654;15253803;14622710;12691384;11886824;11586111;10683288;10486193;10407058;8880851;23859181;22579680;15684654;15283995;12821375;12220704;11259116;10407012;8994060                                                                  |
| P48061 | 12 | 23197665;22842524;22172378;22049432;21806987;21332278;21324162;20374199;19756447;17884290;17061258;23197665                                                                                                                                                                                                       |
| P48067 | 1  | 21620945                                                                                                                                                                                                                                                                                                          |



|        |    |                                                                                                                                                                                                                                                                                                                                                                                                                                                                                                                                                                                                                           |
|--------|----|---------------------------------------------------------------------------------------------------------------------------------------------------------------------------------------------------------------------------------------------------------------------------------------------------------------------------------------------------------------------------------------------------------------------------------------------------------------------------------------------------------------------------------------------------------------------------------------------------------------------------|
| P48167 | 7  | 23248270;21775715;20733588;20190766;17046753;12957506;12618352                                                                                                                                                                                                                                                                                                                                                                                                                                                                                                                                                            |
| P48357 | 1  | 22815920                                                                                                                                                                                                                                                                                                                                                                                                                                                                                                                                                                                                                  |
| P48431 | 14 | 23419261;23169458;22865656;22791629;22537391;22042562;21949375;21513774;20161735;20030221;19925583;19476208;18712509;16087243                                                                                                                                                                                                                                                                                                                                                                                                                                                                                             |
| P48436 | 3  | 23027386;22791629;17597120                                                                                                                                                                                                                                                                                                                                                                                                                                                                                                                                                                                                |
| P48454 | 8  | 23981724;18577426;14767765;12429226;11060810;11007881;9878202;8791233                                                                                                                                                                                                                                                                                                                                                                                                                                                                                                                                                     |
| P48506 | 2  | 21806470;9726263                                                                                                                                                                                                                                                                                                                                                                                                                                                                                                                                                                                                          |
| P48507 | 2  | 21806470;9726263                                                                                                                                                                                                                                                                                                                                                                                                                                                                                                                                                                                                          |
| P48547 | 1  | 21110920                                                                                                                                                                                                                                                                                                                                                                                                                                                                                                                                                                                                                  |
| P48551 | 1  | 22161971                                                                                                                                                                                                                                                                                                                                                                                                                                                                                                                                                                                                                  |
| P48681 | 67 | 23419550;23419261;23281512;23143000;23106570;22791629;22500090;22038821;21956379;21842261;21630007;21513774;21375803;21330787;21251802;20951776;20678995;20673789;20155816;20151365;20100476;20083105;20059998;19925583;19350385;19191513;19163037;19069631;18971163;18611436;18583926;18197384;17612595;17506499;17409380;17184184;17044031;16406666;16339643;16087243;16038450;15869942;15857397;15680701;15464285;15390101;15335106;15288436;15129154;15051157;14610361;12817305;12655601;12578228;12429182;12379246;12205672;11940359;11893024;11810020;11773606;11746449;11260912;11161592;10331437;10225952;9248556 |
| P49137 | 1  | 20943915                                                                                                                                                                                                                                                                                                                                                                                                                                                                                                                                                                                                                  |
| P49238 | 4  | 23664962;23361876;21734283;23361876                                                                                                                                                                                                                                                                                                                                                                                                                                                                                                                                                                                       |
| P49286 | 1  | 20626592                                                                                                                                                                                                                                                                                                                                                                                                                                                                                                                                                                                                                  |
| P49763 | 2  | 22023610;20860549                                                                                                                                                                                                                                                                                                                                                                                                                                                                                                                                                                                                         |
| P49768 | 1  | 19932144                                                                                                                                                                                                                                                                                                                                                                                                                                                                                                                                                                                                                  |
| P49841 | 10 | 22514792;21898827;21720761;20103844;19533653;18768685;17233289;16601144;16511963;15307905                                                                                                                                                                                                                                                                                                                                                                                                                                                                                                                                 |
| P49862 | 3  | 24128681;24128681;22529377                                                                                                                                                                                                                                                                                                                                                                                                                                                                                                                                                                                                |
| P50052 | 1  | 23174180                                                                                                                                                                                                                                                                                                                                                                                                                                                                                                                                                                                                                  |
| P50553 | 3  | 20951776;16497507;17108169                                                                                                                                                                                                                                                                                                                                                                                                                                                                                                                                                                                                |
| P50591 | 2  | 20107429;11170729                                                                                                                                                                                                                                                                                                                                                                                                                                                                                                                                                                                                         |
| P50613 | 1  | 21710280                                                                                                                                                                                                                                                                                                                                                                                                                                                                                                                                                                                                                  |
| P51582 | 1  | 21647706                                                                                                                                                                                                                                                                                                                                                                                                                                                                                                                                                                                                                  |
| P51587 | 1  | 21748659                                                                                                                                                                                                                                                                                                                                                                                                                                                                                                                                                                                                                  |
| P51649 | 4  | 15470819;12955874;9887150;1534322                                                                                                                                                                                                                                                                                                                                                                                                                                                                                                                                                                                         |
| P51805 | 2  | 20702718;20702718                                                                                                                                                                                                                                                                                                                                                                                                                                                                                                                                                                                                         |
| P51946 | 1  | 21710280                                                                                                                                                                                                                                                                                                                                                                                                                                                                                                                                                                                                                  |
| P51948 | 1  | 21710280                                                                                                                                                                                                                                                                                                                                                                                                                                                                                                                                                                                                                  |
| P52333 | 5  | 17131417;16957585;16890196;22715999;20161735                                                                                                                                                                                                                                                                                                                                                                                                                                                                                                                                                                              |
| P52565 | 3  | 19651108;16624299;15799964                                                                                                                                                                                                                                                                                                                                                                                                                                                                                                                                                                                                |
| P52797 | 1  | 21603973                                                                                                                                                                                                                                                                                                                                                                                                                                                                                                                                                                                                                  |
| P52798 | 1  | 22350947                                                                                                                                                                                                                                                                                                                                                                                                                                                                                                                                                                                                                  |
| P52799 | 2  | 23518227;16623828                                                                                                                                                                                                                                                                                                                                                                                                                                                                                                                                                                                                         |
| P52803 | 3  | 21603973;21931787;20202079                                                                                                                                                                                                                                                                                                                                                                                                                                                                                                                                                                                                |
| P53420 | 7  | 21898827;17314203;16629627;11920709;11564534;11356383;11104506                                                                                                                                                                                                                                                                                                                                                                                                                                                                                                                                                            |

|        |    |                                                                                                                                                                                                                                                                                                                                                                                                                                                                                                       |
|--------|----|-------------------------------------------------------------------------------------------------------------------------------------------------------------------------------------------------------------------------------------------------------------------------------------------------------------------------------------------------------------------------------------------------------------------------------------------------------------------------------------------------------|
| P53778 | 54 | 22865681;23361876;22733360;22634758;21310020;20536940;20444938;20381564;19383246;19196180;19090911;18630599;17329433;15707984;11031088;23688865;23404572;22821814;22733360;22634758;22525836;21922518;21394310;20954833;20943915;20444938;20382225;20161735;19846725;19765637;19699199;19418456;19409102;19090911;18708926;18590729;18562123;18511041;18209489;17634369;17443214;16978658;16930431;16511963;16478624;16422251;16187294;16038625;15843065;15320513;14512145;12810381;10331432;23688865 |
| P53779 | 20 | 22821814;22426389;22409452;21671725;21596101;21336655;20107429;19295488;19090911;18209489;17880387;16930431;16417589;16005241;10331432;23303920;22700771;21824499;17670986;22700771                                                                                                                                                                                                                                                                                                                   |
| P54289 | 1  | 21239111                                                                                                                                                                                                                                                                                                                                                                                                                                                                                              |
| P54619 | 2  | 24022865;24022865                                                                                                                                                                                                                                                                                                                                                                                                                                                                                     |
| P54646 | 4  | 17885021;24022865;22865656;17885021                                                                                                                                                                                                                                                                                                                                                                                                                                                                   |
| P54652 | 3  | 16550329;11994804;9416301                                                                                                                                                                                                                                                                                                                                                                                                                                                                             |
| P54707 | 1  | 22275761                                                                                                                                                                                                                                                                                                                                                                                                                                                                                              |
| P54764 | 7  | 23557244;22900481;22824304;21931787;17418490;16959251;15537875                                                                                                                                                                                                                                                                                                                                                                                                                                        |
| P54803 | 4  | 21375803;20374080;10924962;1281366                                                                                                                                                                                                                                                                                                                                                                                                                                                                    |
| P54821 | 1  | 21187959                                                                                                                                                                                                                                                                                                                                                                                                                                                                                              |
| P55008 | 13 | 23419864;23399872;22878925;22722907;22510563;22038545;21620945;20219534;19780197;16155637;11585624;11563627;11064366                                                                                                                                                                                                                                                                                                                                                                                  |
| P55011 | 3  | 21333799;20536931;18799000                                                                                                                                                                                                                                                                                                                                                                                                                                                                            |
| P55055 | 2  | 19891733;19891733                                                                                                                                                                                                                                                                                                                                                                                                                                                                                     |
| P55085 | 1  | 23647384                                                                                                                                                                                                                                                                                                                                                                                                                                                                                              |
| P55087 | 19 | 23831998;23441695;23234244;23098724;21280976;21092735;20590523;20517941;20423707;20109536;19151597;18951883;18267965;18248364;18065151;17074445;16817282;16219025;16089144                                                                                                                                                                                                                                                                                                                            |
| P55107 | 1  | 21196217                                                                                                                                                                                                                                                                                                                                                                                                                                                                                              |
| P55210 | 3  | 22244304;22244304;20816819                                                                                                                                                                                                                                                                                                                                                                                                                                                                            |
| P55211 | 10 | 22244304;23494980;20816819;19120440;18722523;17706365;15796358;22700771;21748659;17298387                                                                                                                                                                                                                                                                                                                                                                                                             |
| P55212 | 1  | 17706365                                                                                                                                                                                                                                                                                                                                                                                                                                                                                              |
| P55851 | 1  | 22865656                                                                                                                                                                                                                                                                                                                                                                                                                                                                                              |
| P55895 | 1  | 22868200                                                                                                                                                                                                                                                                                                                                                                                                                                                                                              |
| P56159 | 7  | 21316153;16906542;15635609;14608602;11331375;19235905;16187294                                                                                                                                                                                                                                                                                                                                                                                                                                        |
| P56199 | 2  | 17161391;17161391                                                                                                                                                                                                                                                                                                                                                                                                                                                                                     |
| P56373 | 1  | 22540742                                                                                                                                                                                                                                                                                                                                                                                                                                                                                              |
| P56693 | 5  | 21538562;21034515;20083105;18756526;16691121                                                                                                                                                                                                                                                                                                                                                                                                                                                          |
| P56704 | 4  | 21273111;19473059;23456240;21249402                                                                                                                                                                                                                                                                                                                                                                                                                                                                   |
| P60033 | 3  | 16806185;11240026;11064366                                                                                                                                                                                                                                                                                                                                                                                                                                                                            |
| P60201 | 9  | 23832758;19053058;17376002;15857397;14599661;14534257;10833310;10196465;9786985                                                                                                                                                                                                                                                                                                                                                                                                                       |
| P60484 | 11 | 24068802;23726960;23647386;22253859;22123082;20816819;20694004;17941496;16003541;22123082;20694004                                                                                                                                                                                                                                                                                                                                                                                                    |
| P60568 | 8  | 23731227;22189457;14760011;14563689;12165135;10052669;9014956;8426182                                                                                                                                                                                                                                                                                                                                                                                                                                 |
| P60709 | 8  | 21994364;20200564;17418490;17184189;16083359;16083356;9344569;8926629                                                                                                                                                                                                                                                                                                                                                                                                                                 |
| P60953 | 3  | 21375803;19943951;15736231                                                                                                                                                                                                                                                                                                                                                                                                                                                                            |

|              |    |                                                                                                                                                                                                                                                                                                                                                                                                                                                                                                                                                                                                                                                     |
|--------------|----|-----------------------------------------------------------------------------------------------------------------------------------------------------------------------------------------------------------------------------------------------------------------------------------------------------------------------------------------------------------------------------------------------------------------------------------------------------------------------------------------------------------------------------------------------------------------------------------------------------------------------------------------------------|
| P61073       | 9  | 23197665;22842524;22049432;21332278;21324162;21196217;20374199;20155816;17061258                                                                                                                                                                                                                                                                                                                                                                                                                                                                                                                                                                    |
| P61278       | 10 | 23333673;19001189;12187277;11898691;10853753;8988397;7478725;2426476;2410810;836537                                                                                                                                                                                                                                                                                                                                                                                                                                                                                                                                                                 |
| P61586       | 70 | 24297045;24246280;23830951;23360272;22902990;22773197;22733360;22700771;22350947;22239108;21848846;21781963;21459564;21447094;21443453;21381984;21375803;21308793;21283639;21193903;20406886;20203533;20202079;19955379;19943951;19925560;19623163;19473059;19324014;19125588;19061375;18980474;18692574;17692017;17634369;17618980;17011208;16990586;16629619;16629618;16624299;16585268;16154567;15885321;15880494;15845084;15799964;15736231;15293235;15219678;15031718;12860969;12691734;12598630;12480155;12440379;12165352;12151536;8158556;2263408;24297045;21815784;19623163;18722369;17217414;22700771;19519335;17692017;12691734;18980476 |
| P61812       | 26 | 23727390;23562792;22079829;22016551;21787762;21760535;21273450;20623539;19719963;19342245;18581269;18293403;18221366;17611274;16498024;15380482;15145083;14637102;14552879;12127673;12056841;8963994;8834102;7846578;8091423;15998793                                                                                                                                                                                                                                                                                                                                                                                                               |
| P61978       | 1  | 19323997                                                                                                                                                                                                                                                                                                                                                                                                                                                                                                                                                                                                                                            |
| P61981       | 2  | 23177959;22110655                                                                                                                                                                                                                                                                                                                                                                                                                                                                                                                                                                                                                                   |
| P62158       | 5  | 23255597;22027236;20849836;11825508;10700012                                                                                                                                                                                                                                                                                                                                                                                                                                                                                                                                                                                                        |
| P62166       | 1  | 20585375                                                                                                                                                                                                                                                                                                                                                                                                                                                                                                                                                                                                                                            |
| P62258       | 4  | 23177959;22110655;20399821;20141154                                                                                                                                                                                                                                                                                                                                                                                                                                                                                                                                                                                                                 |
| P62328       | 1  | 19861493                                                                                                                                                                                                                                                                                                                                                                                                                                                                                                                                                                                                                                            |
| P62805       | 2  | 24336730;21439269                                                                                                                                                                                                                                                                                                                                                                                                                                                                                                                                                                                                                                   |
| P62937       | 1  | 12850583                                                                                                                                                                                                                                                                                                                                                                                                                                                                                                                                                                                                                                            |
| P63000       | 4  | 21925174;21375803;19052208;15736231                                                                                                                                                                                                                                                                                                                                                                                                                                                                                                                                                                                                                 |
| P63098: Q96L | 8  | 23981724;18577426;14767765;12429226;11060810;11007881;9878202;8791233                                                                                                                                                                                                                                                                                                                                                                                                                                                                                                                                                                               |
| P63104       | 1  | 21559420                                                                                                                                                                                                                                                                                                                                                                                                                                                                                                                                                                                                                                            |
| P63165       | 1  | 23054070                                                                                                                                                                                                                                                                                                                                                                                                                                                                                                                                                                                                                                            |
| P68431       | 3  | 22801282;22409448;21439269                                                                                                                                                                                                                                                                                                                                                                                                                                                                                                                                                                                                                          |
| P70658       | 1  | 23880092                                                                                                                                                                                                                                                                                                                                                                                                                                                                                                                                                                                                                                            |
| P78348       | 2  | 23224900;21725232                                                                                                                                                                                                                                                                                                                                                                                                                                                                                                                                                                                                                                   |
| P78352       | 3  | 22052241;21658682;18053028                                                                                                                                                                                                                                                                                                                                                                                                                                                                                                                                                                                                                          |
| P78357       | 4  | 22407783;20610764;18400887;14984408                                                                                                                                                                                                                                                                                                                                                                                                                                                                                                                                                                                                                 |
| P78423       | 3  | 23361876;18511041;23361876                                                                                                                                                                                                                                                                                                                                                                                                                                                                                                                                                                                                                          |
| P78426       | 3  | 22473852;19955358;18635866                                                                                                                                                                                                                                                                                                                                                                                                                                                                                                                                                                                                                          |
| P78504       | 3  | 22452482;21156172;22452482                                                                                                                                                                                                                                                                                                                                                                                                                                                                                                                                                                                                                          |
| P78509       | 1  | 20610764                                                                                                                                                                                                                                                                                                                                                                                                                                                                                                                                                                                                                                            |
| P80294       | 1  | 17218363                                                                                                                                                                                                                                                                                                                                                                                                                                                                                                                                                                                                                                            |
| P84022       | 2  | 23727390;22208735                                                                                                                                                                                                                                                                                                                                                                                                                                                                                                                                                                                                                                   |
| P98170       | 5  | 18367607;11379817;11063050;10658186;8786386                                                                                                                                                                                                                                                                                                                                                                                                                                                                                                                                                                                                         |
| Q00535       | 3  | 22514792;15715081;15715081                                                                                                                                                                                                                                                                                                                                                                                                                                                                                                                                                                                                                          |

|        |    |                                                                                                                                                                                                                                                                                                                                                                                                                                                                                                                                                                                                                                                                                                                                                                                                                                    |
|--------|----|------------------------------------------------------------------------------------------------------------------------------------------------------------------------------------------------------------------------------------------------------------------------------------------------------------------------------------------------------------------------------------------------------------------------------------------------------------------------------------------------------------------------------------------------------------------------------------------------------------------------------------------------------------------------------------------------------------------------------------------------------------------------------------------------------------------------------------|
| Q00653 | 64 | 23880092;23574812;23553703;23499960;23492769;23361876;23359120;22981449;22853439;22798270;22733360;22578249;22484641;22450230;22324804;22289688;22125095;22038545;21889575;21784069;21510818;21383505;20954833;20868716;20862369;20830289;20799028;20708606;20646530;20370565;20176685;20091771;20047904;19891733;19716366;19522780;19418318;19416634;19358984;19295488;19056384;18948848;18665052;18628687;18197140;18180375;17918744;17664140;16776360;16253423;16179517;15998793;15922485;15684769;15478370;15452194;15229242;15135227;11517251;11393255;11150324;10428065;9729336-9547234                                                                                                                                                                                                                                      |
| Q01064 | 1  | 21297958                                                                                                                                                                                                                                                                                                                                                                                                                                                                                                                                                                                                                                                                                                                                                                                                                           |
| Q01094 | 3  | 22848730;22510563;22848730                                                                                                                                                                                                                                                                                                                                                                                                                                                                                                                                                                                                                                                                                                                                                                                                         |
| Q01581 | 1  | 20399821                                                                                                                                                                                                                                                                                                                                                                                                                                                                                                                                                                                                                                                                                                                                                                                                                           |
| Q01668 | 2  | 17291691;22081708                                                                                                                                                                                                                                                                                                                                                                                                                                                                                                                                                                                                                                                                                                                                                                                                                  |
| Q01668 | 5  | 17448606;14753480;10924962;10222112;9007541                                                                                                                                                                                                                                                                                                                                                                                                                                                                                                                                                                                                                                                                                                                                                                                        |
| Q01860 | 13 | 23419261;22865656;21949375;21538562;20875224;20374080;20161735;20030221;19476208;19318112;19053058;18712509;14534257                                                                                                                                                                                                                                                                                                                                                                                                                                                                                                                                                                                                                                                                                                               |
| Q01959 | 3  | 18992013;16503802;11259109                                                                                                                                                                                                                                                                                                                                                                                                                                                                                                                                                                                                                                                                                                                                                                                                         |
| Q01995 | 2  | 21655070;16344894                                                                                                                                                                                                                                                                                                                                                                                                                                                                                                                                                                                                                                                                                                                                                                                                                  |
| Q02153 | 1  | 21145575                                                                                                                                                                                                                                                                                                                                                                                                                                                                                                                                                                                                                                                                                                                                                                                                                           |
| Q02223 | 1  | 23088438                                                                                                                                                                                                                                                                                                                                                                                                                                                                                                                                                                                                                                                                                                                                                                                                                           |
| Q02246 | 5  | 23285014;19458237;20610764;19458237;14984408                                                                                                                                                                                                                                                                                                                                                                                                                                                                                                                                                                                                                                                                                                                                                                                       |
| Q02297 | 13 | 23935974;23758598;23097328;22042562;21539896;20734425;19780197;18756526;16005441;14618270;11797086;23758598;23097328                                                                                                                                                                                                                                                                                                                                                                                                                                                                                                                                                                                                                                                                                                               |
| Q02363 | 1  | 21679705                                                                                                                                                                                                                                                                                                                                                                                                                                                                                                                                                                                                                                                                                                                                                                                                                           |
| Q02750 | 7  | 22824323;19469685;11031088;21355419;20707645;18715715;17329433                                                                                                                                                                                                                                                                                                                                                                                                                                                                                                                                                                                                                                                                                                                                                                     |
| Q02763 | 3  | 22996658;20375135;19859984                                                                                                                                                                                                                                                                                                                                                                                                                                                                                                                                                                                                                                                                                                                                                                                                         |
| Q02962 | 1  | 22473852                                                                                                                                                                                                                                                                                                                                                                                                                                                                                                                                                                                                                                                                                                                                                                                                                           |
| Q03060 | 3  | 16088035;14662791;12721213                                                                                                                                                                                                                                                                                                                                                                                                                                                                                                                                                                                                                                                                                                                                                                                                         |
| Q03135 | 2  | 17993744;17275798                                                                                                                                                                                                                                                                                                                                                                                                                                                                                                                                                                                                                                                                                                                                                                                                                  |
| Q03181 | 5  | 23374874;21685825;20176685;20058304;21740108                                                                                                                                                                                                                                                                                                                                                                                                                                                                                                                                                                                                                                                                                                                                                                                       |
| Q03405 | 2  | 21573723;19651246                                                                                                                                                                                                                                                                                                                                                                                                                                                                                                                                                                                                                                                                                                                                                                                                                  |
| Q03431 | 8  | 22710945;22218778;17376000;11853032;9427170;8830990;8786732;8024422                                                                                                                                                                                                                                                                                                                                                                                                                                                                                                                                                                                                                                                                                                                                                                |
| Q04206 | 8  | 22187437;21134302;19710300;19469092;17918744;10179517;9547234;17918744                                                                                                                                                                                                                                                                                                                                                                                                                                                                                                                                                                                                                                                                                                                                                             |
| Q04917 | 1  | 23177959                                                                                                                                                                                                                                                                                                                                                                                                                                                                                                                                                                                                                                                                                                                                                                                                                           |
| Q05329 | 9  | 23103212;22569103;20132484;20059302;18353556;17559837;10740227;23152062;21620945                                                                                                                                                                                                                                                                                                                                                                                                                                                                                                                                                                                                                                                                                                                                                   |
| Q05513 | 2  | 22329943;22329943                                                                                                                                                                                                                                                                                                                                                                                                                                                                                                                                                                                                                                                                                                                                                                                                                  |
| Q05586 | 92 | 22579680;22046257;21756907;20226782;19765637;18835424;17559837;16460709;16099549;15922485;15857397;15684654;15283995;12946581;12220704;11259116;11158251;11033004;10886684;10854260;10686069;9872459;23618680;22650041;22650040;22449374;22402659;21756907;20675200;20495588;20211179;19939961;19923273;19772458;19668258;19407255;19026989;19019202;19005051;18635178;18484790;18177675;18053028;17983769;17287199;16703907;16678969;15950221;15901762;15748877;15640756;15313031;14758350;12903514;12885421;12162901;11992467;11107569;11101210;11043549;11007881;10984543;10720616;10674755;10486193;10419375;9918969;9773443;10921077;9048311;9002066;8985951;9594166;8880851;8657340;8584148;7472559;7889371;8207481;7909561;8137170;8103243;1588610;1311880;1837648;2163498;2155794;2377900-1982014-2841902-3057216-16198697 |

|        |    |                                                                                                                                                                                                                                                                                                                                                                                                                                                                                                                                                                                                                                                                                                                                           |
|--------|----|-------------------------------------------------------------------------------------------------------------------------------------------------------------------------------------------------------------------------------------------------------------------------------------------------------------------------------------------------------------------------------------------------------------------------------------------------------------------------------------------------------------------------------------------------------------------------------------------------------------------------------------------------------------------------------------------------------------------------------------------|
| Q06830 | 2  | 19119913;21187959                                                                                                                                                                                                                                                                                                                                                                                                                                                                                                                                                                                                                                                                                                                         |
| Q06945 | 1  | 21196217                                                                                                                                                                                                                                                                                                                                                                                                                                                                                                                                                                                                                                                                                                                                  |
| Q07157 | 5  | 22798270;22409448;20590523;19891526;18092342                                                                                                                                                                                                                                                                                                                                                                                                                                                                                                                                                                                                                                                                                              |
| Q07343 | 4  | 23028463;23028463;22865690;18455876                                                                                                                                                                                                                                                                                                                                                                                                                                                                                                                                                                                                                                                                                                       |
| Q07812 | 57 | 23274522;19525878;23731227;23492769;23344852;23274522;23180094;22733560;22453521;22427977;22342994;22295509;22289688;21787762;21748659;21496122;21111721;20830289;20799028;20708606;20385073;20370565;20176685;20153400;20107429;19891733;19815005;19525878;19473058;19373550;19183262;18948848;18838947;18665052;18628687;18322000;18209489;18197140;18180375;17945432;17704735;17664140;17645692;17621255;17465991;17418876;17331604;17304106;16601144;16303916;15668909;15115604;14507967;12794736;11810634;10709875;20001688                                                                                                                                                                                                          |
| Q07869 | 10 | 23374874;22537532;21963672;19926854;19416634;18628687;18367664;17073815;15899263;21740108                                                                                                                                                                                                                                                                                                                                                                                                                                                                                                                                                                                                                                                 |
| Q07954 | 2  | 23867460;19651246                                                                                                                                                                                                                                                                                                                                                                                                                                                                                                                                                                                                                                                                                                                         |
| Q08043 | 1  | 23145141                                                                                                                                                                                                                                                                                                                                                                                                                                                                                                                                                                                                                                                                                                                                  |
| Q08050 | 1  | 23386122                                                                                                                                                                                                                                                                                                                                                                                                                                                                                                                                                                                                                                                                                                                                  |
| Q08209 | 8  | 23981724;18577426;14767765;12429226;11060810;11007881;9878202;8791233                                                                                                                                                                                                                                                                                                                                                                                                                                                                                                                                                                                                                                                                     |
| Q08462 | 6  | 20141154;19119913;18677446;15698618;10804204;3548963                                                                                                                                                                                                                                                                                                                                                                                                                                                                                                                                                                                                                                                                                      |
| Q08499 | 1  | 23028463                                                                                                                                                                                                                                                                                                                                                                                                                                                                                                                                                                                                                                                                                                                                  |
| Q08722 | 2  | 21970599;21168495                                                                                                                                                                                                                                                                                                                                                                                                                                                                                                                                                                                                                                                                                                                         |
| Q08828 | 7  | 23349859;20141154;19119913;18677446;15698618;10804204;3548963                                                                                                                                                                                                                                                                                                                                                                                                                                                                                                                                                                                                                                                                             |
| Q09428 | 11 | 23255597;22714048;22197047;22177998;22078759;21492614;21145891;20410530;18032110;17657312;23255597                                                                                                                                                                                                                                                                                                                                                                                                                                                                                                                                                                                                                                        |
| Q09666 | 1  | 16930430                                                                                                                                                                                                                                                                                                                                                                                                                                                                                                                                                                                                                                                                                                                                  |
| Q12778 | 1  | 19533653                                                                                                                                                                                                                                                                                                                                                                                                                                                                                                                                                                                                                                                                                                                                  |
| Q12791 | 1  | 22534235                                                                                                                                                                                                                                                                                                                                                                                                                                                                                                                                                                                                                                                                                                                                  |
| Q12794 | 4  | 21111028;15892130;7355381;426486                                                                                                                                                                                                                                                                                                                                                                                                                                                                                                                                                                                                                                                                                                          |
| Q12860 | 4  | 17425960;20610764;19458237;14984408                                                                                                                                                                                                                                                                                                                                                                                                                                                                                                                                                                                                                                                                                                       |
| Q12879 | 82 | 23618680;22650041;22650040;22449374;22402659;21756907;20675200;20495588;20211179;19939961;19923273;19772458;19668258;19407255;19026989;19019202;19005051;18635178;18484790;18177675;18053028;17983769;17287199;16703907;16678969;15950221;15901762;15748877;15640756;15313031;14758350;12903514;12885421;12162901;11992467;11107569;11101210;11043549;11007881;10984543;10720616;10674755;10486193;10419375;9918969;9773443;10921077;9048311;9002066;8985951;9594166;8880851;8657340;8584148;7472559;7889371;8207481;7909561;8137170;8103243;1588610;1311880;1837648;2163498;2155794;2377900;1982014;2841902;3057216;16198697;19446017;18835424;18534577;17853656;16099549;15283995;12220704;11259116;11160435;11033004;10886684;10854260 |
| Q13002 | 2  | 19224535;8994060                                                                                                                                                                                                                                                                                                                                                                                                                                                                                                                                                                                                                                                                                                                          |
| Q13003 | 1  | 8994060                                                                                                                                                                                                                                                                                                                                                                                                                                                                                                                                                                                                                                                                                                                                   |
| Q13018 | 1  | 19306380                                                                                                                                                                                                                                                                                                                                                                                                                                                                                                                                                                                                                                                                                                                                  |
| Q13093 | 1  | 16339448                                                                                                                                                                                                                                                                                                                                                                                                                                                                                                                                                                                                                                                                                                                                  |
| Q13114 | 1  | 22484641                                                                                                                                                                                                                                                                                                                                                                                                                                                                                                                                                                                                                                                                                                                                  |
| Q13118 | 1  | 17167171                                                                                                                                                                                                                                                                                                                                                                                                                                                                                                                                                                                                                                                                                                                                  |
| Q13127 | 1  | 21671725                                                                                                                                                                                                                                                                                                                                                                                                                                                                                                                                                                                                                                                                                                                                  |
| Q13131 | 2  | 22865656;17885021                                                                                                                                                                                                                                                                                                                                                                                                                                                                                                                                                                                                                                                                                                                         |
| Q13133 | 3  | 23433337;19891733;19891733                                                                                                                                                                                                                                                                                                                                                                                                                                                                                                                                                                                                                                                                                                                |

|        |    |                                                                                                                                                                                                                                                                                                                                                                                                                                                                                                                                                                                                                                                                                                                |
|--------|----|----------------------------------------------------------------------------------------------------------------------------------------------------------------------------------------------------------------------------------------------------------------------------------------------------------------------------------------------------------------------------------------------------------------------------------------------------------------------------------------------------------------------------------------------------------------------------------------------------------------------------------------------------------------------------------------------------------------|
| Q13158 | 5  | 23935974;23935974;23574812;17518537;11208917                                                                                                                                                                                                                                                                                                                                                                                                                                                                                                                                                                                                                                                                   |
| Q13164 | 15 | 22865681;23361876;22733360;22634758;21310020;20536940;20444938;20381564;19383246;19196180;19090911;18630599;17329433;15707984;11031088                                                                                                                                                                                                                                                                                                                                                                                                                                                                                                                                                                         |
| Q13177 | 1  | 10426320                                                                                                                                                                                                                                                                                                                                                                                                                                                                                                                                                                                                                                                                                                       |
| Q13214 | 1  | 12009760                                                                                                                                                                                                                                                                                                                                                                                                                                                                                                                                                                                                                                                                                                       |
| Q13224 | 79 | 23618680;22650041;22650040;22449374;22402659;21756907;20675200;20495588;20211179;19939961;19923273;19772458;19668258;19407255;19026989;19019202;19005051;18635178;18484790;18177675;18053028;17983769;17287199;16703907;16678969;15950221;15901762;15748877;15640756;15313031;14758350;12903514;12885421;12162901;11992467;11107569;11101210;11043549;11007881;10984543;10720616;10674755;10486193;10419375;9918969;9773443;10921077;9048311;9002066;8985951;9594166;8880851;8657340;8584148;7472559;7889371;8207481;7909561;8137170;8103243;1588610;1311880;1837648;2163498;2155794;2377900;1982014;2841902;3057216;16198697;22424878;21167847;20079352;18835424;17559837;15283995;14654094;12220704;10886684 |
| Q13253 | 10 | 23859181;21508230;20850923;20005873;18221366;17151948;16938843;16087174;15296834;11078560                                                                                                                                                                                                                                                                                                                                                                                                                                                                                                                                                                                                                      |
| Q13255 | 12 | 23570727;22227062;16004983;15115597;11852976;11825670;11723176;11476590;19110202;16004983;11440816;11043525                                                                                                                                                                                                                                                                                                                                                                                                                                                                                                                                                                                                    |
| Q13275 | 2  | 17278142;12009760                                                                                                                                                                                                                                                                                                                                                                                                                                                                                                                                                                                                                                                                                              |
| Q13304 | 1  | 19528093                                                                                                                                                                                                                                                                                                                                                                                                                                                                                                                                                                                                                                                                                                       |
| Q13309 | 1  | 23386122                                                                                                                                                                                                                                                                                                                                                                                                                                                                                                                                                                                                                                                                                                       |
| Q13315 | 7  | 21748659;18256991;12236201;8686572;8475307;8145266;7117323                                                                                                                                                                                                                                                                                                                                                                                                                                                                                                                                                                                                                                                     |
| Q13332 | 3  | 22836147;20179269;19780196                                                                                                                                                                                                                                                                                                                                                                                                                                                                                                                                                                                                                                                                                     |
| Q13349 | 29 | 22150233;22078757;22044160;21784069;21145887;21142687;20146558;20082560;19250688;17048772;16379576;16198705;15992367;15890340;15659600;15465595;15312174;15102919;15009633;22150233;22044160;21784069;21145887;19250688;15992367;15659600;15312174;15102919;15009633                                                                                                                                                                                                                                                                                                                                                                                                                                           |
| Q13393 | 2  | 23031841;12499056                                                                                                                                                                                                                                                                                                                                                                                                                                                                                                                                                                                                                                                                                              |
| Q13464 | 23 | 24297045;21815784;19623163;18722369;17217414;19519335;17692017;12691734;18980476;22733360;20141964;19955379;19651108;17692017;16624299;16154567;15880494;15799964;15293235;15219678;12480155;12151536;11471206                                                                                                                                                                                                                                                                                                                                                                                                                                                                                                 |
| Q13467 | 1  | 23251385                                                                                                                                                                                                                                                                                                                                                                                                                                                                                                                                                                                                                                                                                                       |
| Q13489 | 9  | 11517251;11379817;11379817;11063050;11063050;10658186;10658186;8786386;8786386                                                                                                                                                                                                                                                                                                                                                                                                                                                                                                                                                                                                                                 |
| Q13490 | 2  | 22450230;11517251                                                                                                                                                                                                                                                                                                                                                                                                                                                                                                                                                                                                                                                                                              |
| Q13509 | 8  | 23419201;21375805;20100470;19954591;19402252;18721107;15051157;11002520                                                                                                                                                                                                                                                                                                                                                                                                                                                                                                                                                                                                                                        |
| Q13516 | 14 | 14648541;23460872;22496912;22473852;22173726;21538562;19772605;19053058;18992013;18756526;18716209;17108169;14534257;21538562                                                                                                                                                                                                                                                                                                                                                                                                                                                                                                                                                                                  |
| Q13541 | 1  | 19533653                                                                                                                                                                                                                                                                                                                                                                                                                                                                                                                                                                                                                                                                                                       |
| Q13546 | 1  | 17044031                                                                                                                                                                                                                                                                                                                                                                                                                                                                                                                                                                                                                                                                                                       |
| Q13554 | 12 | 23707296;22911773;22384207;22296735;22027236;21167847;20070863;19409102;19332038;17719180;17592948;17258865                                                                                                                                                                                                                                                                                                                                                                                                                                                                                                                                                                                                    |
| Q13635 | 2  | 22391313;19955358                                                                                                                                                                                                                                                                                                                                                                                                                                                                                                                                                                                                                                                                                              |
| Q13639 | 1  | 15817810                                                                                                                                                                                                                                                                                                                                                                                                                                                                                                                                                                                                                                                                                                       |
| Q13698 | 6  | 17448606;14753480;10924962;10222112;9007541;22081708                                                                                                                                                                                                                                                                                                                                                                                                                                                                                                                                                                                                                                                           |

|        |    |                                                                                                                                                                                                                                                                                                                                                                                                                                                                                                                                                                                                                      |
|--------|----|----------------------------------------------------------------------------------------------------------------------------------------------------------------------------------------------------------------------------------------------------------------------------------------------------------------------------------------------------------------------------------------------------------------------------------------------------------------------------------------------------------------------------------------------------------------------------------------------------------------------|
| Q13813 | 10 | 19376093;19111721;18289533;17880386;17181549;15893424;12821393;12614588;12207572;9535120                                                                                                                                                                                                                                                                                                                                                                                                                                                                                                                             |
| Q13873 | 1  | 21764678                                                                                                                                                                                                                                                                                                                                                                                                                                                                                                                                                                                                             |
| Q13936 | 7  | 17291691;17448606;14753480;10924962;10222112;9007541;22081708                                                                                                                                                                                                                                                                                                                                                                                                                                                                                                                                                        |
| Q14005 | 1  | 16572623                                                                                                                                                                                                                                                                                                                                                                                                                                                                                                                                                                                                             |
| Q14116 | 3  | 23140983;22378878;18367607                                                                                                                                                                                                                                                                                                                                                                                                                                                                                                                                                                                           |
| Q14145 | 1  | 22853439                                                                                                                                                                                                                                                                                                                                                                                                                                                                                                                                                                                                             |
| Q14194 | 1  | 22181040                                                                                                                                                                                                                                                                                                                                                                                                                                                                                                                                                                                                             |
| Q14195 | 1  | 22181040                                                                                                                                                                                                                                                                                                                                                                                                                                                                                                                                                                                                             |
| Q14249 | 1  | 16689664                                                                                                                                                                                                                                                                                                                                                                                                                                                                                                                                                                                                             |
| Q14254 | 1  | 22878913                                                                                                                                                                                                                                                                                                                                                                                                                                                                                                                                                                                                             |
| Q14416 | 6  | 19110202;16004983;11440816;11043525;21451028;11771948                                                                                                                                                                                                                                                                                                                                                                                                                                                                                                                                                                |
| Q14432 | 1  | 20830289                                                                                                                                                                                                                                                                                                                                                                                                                                                                                                                                                                                                             |
| Q14457 | 3  | 23852559;21854445;20210855                                                                                                                                                                                                                                                                                                                                                                                                                                                                                                                                                                                           |
| Q14512 | 1  | 17553847                                                                                                                                                                                                                                                                                                                                                                                                                                                                                                                                                                                                             |
| Q14563 | 12 | 23116416;21640756;17997325;17278142;17099709;16860320;16540569;16230022;16198706;15094469;14727128;12009760                                                                                                                                                                                                                                                                                                                                                                                                                                                                                                          |
| Q14624 | 1  | 21559420                                                                                                                                                                                                                                                                                                                                                                                                                                                                                                                                                                                                             |
| Q14653 | 1  | 22161971                                                                                                                                                                                                                                                                                                                                                                                                                                                                                                                                                                                                             |
| Q14721 | 1  | 21110920                                                                                                                                                                                                                                                                                                                                                                                                                                                                                                                                                                                                             |
| Q14764 | 1  | 23106570                                                                                                                                                                                                                                                                                                                                                                                                                                                                                                                                                                                                             |
| Q14765 | 1  | 17301687                                                                                                                                                                                                                                                                                                                                                                                                                                                                                                                                                                                                             |
| Q14790 | 4  | 17518537;12568318;11379817;19006686                                                                                                                                                                                                                                                                                                                                                                                                                                                                                                                                                                                  |
| Q14832 | 6  | 19110202;16004983;11440816;11043525;21451028;11771948                                                                                                                                                                                                                                                                                                                                                                                                                                                                                                                                                                |
| Q14833 | 4  | 19110202;16004983;11440816;11043525                                                                                                                                                                                                                                                                                                                                                                                                                                                                                                                                                                                  |
| Q14957 | 69 | 23618680;22650041;22650040;22449374;22402659;21756907;20675200;20495588;20211179;19939961;19923273;19772458;19668258;19407255;19026989;19019202;19005051;18635178;18484790;18177675;18053028;17983769;17287199;16703907;16678969;15950221;15901762;15748877;15640756;15313031;14758350;12903514;12885421;12162901;11992467;11107569;11101210;11043549;11007881;10984543;10720616;10674755;10486193;10419375;9918969;9773443;10921077;9048311;9002066;8985951;9594166;8880851;8657340;8584148;7472559;7889371;8207481;7909561;8137170;8103243;1588610;1311880;1837648;2163498;2155794;2377900;1982014;2841902;3057216 |
| Q15077 | 1  | 21647706                                                                                                                                                                                                                                                                                                                                                                                                                                                                                                                                                                                                             |
| Q15078 | 4  | 15715081;5348874;15715081;15715081                                                                                                                                                                                                                                                                                                                                                                                                                                                                                                                                                                                   |
| Q15109 | 2  | 20195207;11188567                                                                                                                                                                                                                                                                                                                                                                                                                                                                                                                                                                                                    |
| Q15303 | 4  | 23758598;23097328;20734425;11797086                                                                                                                                                                                                                                                                                                                                                                                                                                                                                                                                                                                  |
| Q15327 | 1  | 21367919                                                                                                                                                                                                                                                                                                                                                                                                                                                                                                                                                                                                             |
| Q15375 | 5  | 20949525;12075988;16983667;12075988;21603973                                                                                                                                                                                                                                                                                                                                                                                                                                                                                                                                                                         |
| Q15386 | 1  | 17218363                                                                                                                                                                                                                                                                                                                                                                                                                                                                                                                                                                                                             |
| Q15389 | 6  | 23562792;22023610;22020092;20860549;20799882;20375135                                                                                                                                                                                                                                                                                                                                                                                                                                                                                                                                                                |
| Q15465 | 18 | 23859181;23177959;22579680;22391313;22243800;21196217;21107202;20384775;19955358;19383401;19278333;18635866;18029281;17978191;16262629;14749190;12859063;12520472                                                                                                                                                                                                                                                                                                                                                                                                                                                    |
| Q15628 | 1  | 23574812                                                                                                                                                                                                                                                                                                                                                                                                                                                                                                                                                                                                             |

|        |    |                                                                                                                                                                                                                                                                                                                                                                                                                                                                                                                      |
|--------|----|----------------------------------------------------------------------------------------------------------------------------------------------------------------------------------------------------------------------------------------------------------------------------------------------------------------------------------------------------------------------------------------------------------------------------------------------------------------------------------------------------------------------|
| Q15759 | 39 | 23688865;23404572;22821814;22733360;22634758;22525836;21922518;21394310;20954833;20943915;20444938;20382225;20161735;19846725;19765637;19699199;19418456;19409102;19090911;18708926;18590729;18562123;18511041;18209489;17634369;17443214;16978658;16930431;16511963;16478624;16422251;16187294;16038625;15843065;15320513;14512145;12810381;10331432;23688865                                                                                                                                                       |
| Q15768 | 4  | 22900481;22411787;17978191;22350947                                                                                                                                                                                                                                                                                                                                                                                                                                                                                  |
| Q15796 | 1  | 22208735                                                                                                                                                                                                                                                                                                                                                                                                                                                                                                             |
| Q15797 | 2  | 24336730;21518886                                                                                                                                                                                                                                                                                                                                                                                                                                                                                                    |
| Q15842 | 1  | 17108688                                                                                                                                                                                                                                                                                                                                                                                                                                                                                                             |
| Q15848 | 3  | 24060491;22815920;16213239                                                                                                                                                                                                                                                                                                                                                                                                                                                                                           |
| Q16099 | 9  | 19224535;15901762;15748877;15144859;15032708;10763505;10720616;9217092;7965063                                                                                                                                                                                                                                                                                                                                                                                                                                       |
| Q16181 | 1  | 20399821                                                                                                                                                                                                                                                                                                                                                                                                                                                                                                             |
| Q16236 | 11 | 22853439;23523995;23215850;21926641;21806470;21764072;21176673;20862369;19589199;17912625;21806470                                                                                                                                                                                                                                                                                                                                                                                                                   |
| Q16288 | 21 | 23867460;23856436;23792206;23746279;23174180;21783247;21441969;20171177;18585435;18253945;17522325;17316612;12774239;11550223;11161589;11077420;10993692;9391013;8298102;1333605;23792206                                                                                                                                                                                                                                                                                                                            |
| Q16394 | 1  | 23217490                                                                                                                                                                                                                                                                                                                                                                                                                                                                                                             |
| Q16478 | 10 | 19224535;15901762;15748877;15144859;15032708;10763505;10720616;9217092;7965063;8994060                                                                                                                                                                                                                                                                                                                                                                                                                               |
| Q16539 | 39 | 23688865;23404572;22821814;22733360;22634758;22525836;21922518;21394310;20954833;20943915;20444938;20382225;20161735;19846725;19765637;19699199;19418456;19409102;19090911;18708926;18590729;18562123;18511041;18209489;17634369;17443214;16978658;16930431;16511963;16478624;16422251;16187294;16038625;15843065;15320513;14512145;12810381;10331432;23688865                                                                                                                                                       |
| Q16552 | 3  | 22985669;22875000;21034793                                                                                                                                                                                                                                                                                                                                                                                                                                                                                           |
| Q16555 | 3  | 22181040;20438770;20141154                                                                                                                                                                                                                                                                                                                                                                                                                                                                                           |
| Q16558 | 1  | 22534235                                                                                                                                                                                                                                                                                                                                                                                                                                                                                                             |
| Q16568 | 1  | 23151374                                                                                                                                                                                                                                                                                                                                                                                                                                                                                                             |
| Q16572 | 3  | 17229408;16433440;16300756                                                                                                                                                                                                                                                                                                                                                                                                                                                                                           |
| Q16612 | 2  | 21430360;21157914                                                                                                                                                                                                                                                                                                                                                                                                                                                                                                    |
| Q16619 | 1  | 14715438                                                                                                                                                                                                                                                                                                                                                                                                                                                                                                             |
| Q16620 | 56 | 23583688;22027236;20079352;19703592;19222991;23884949;23856436;23792206;23583688;23174180;22423083;22244304;22027236;21476782;21421025;21358740;21110803;20536940;20209974;20171177;20079352;19923273;19788572;19703592;19545610;19407255;19222991;19182380;18672032;18585708;18585435;18320028;18305238;17719180;17522325;17376001;17234430;16632872;15901762;15707984;15611995;15296835;12774239;12189689;12115676;11430880;11331375;11161589;11077420;10993692;10757326;10712659;9391013;8298102;1333605;23792206 |
| Q16625 | 5  | 22798270;22409448;21298060;20590523;18092342                                                                                                                                                                                                                                                                                                                                                                                                                                                                         |
| Q16627 | 9  | 22730180;22510563;22407783;21704617;20607865;17506499;17390308;15995139;15739189                                                                                                                                                                                                                                                                                                                                                                                                                                     |
| Q16653 | 13 | 23642707;21534729;21110803;19672953;19580419;19053058;18930141;17906634;17630211;15548666;15319003;15031718;14563689                                                                                                                                                                                                                                                                                                                                                                                                 |
| Q16659 | 15 | 22865681;23361876;22733360;22634758;21310020;20536940;20444938;20381564;19383246;19196180;19090911;18630599;17329433;15707984;11031088                                                                                                                                                                                                                                                                                                                                                                               |



|        |      |                                                                                                                                                                                                                                                                                                                                                                                                                                                                                                                                                                                                                                                                                                                                                                                                                                                                                                                                                                                                                                                                                                                                                                                                                                                                                                  |
|--------|------|--------------------------------------------------------------------------------------------------------------------------------------------------------------------------------------------------------------------------------------------------------------------------------------------------------------------------------------------------------------------------------------------------------------------------------------------------------------------------------------------------------------------------------------------------------------------------------------------------------------------------------------------------------------------------------------------------------------------------------------------------------------------------------------------------------------------------------------------------------------------------------------------------------------------------------------------------------------------------------------------------------------------------------------------------------------------------------------------------------------------------------------------------------------------------------------------------------------------------------------------------------------------------------------------------|
| Q16665 | 6    | 23234244;21396163;21092735;18248364;16044166;15161688                                                                                                                                                                                                                                                                                                                                                                                                                                                                                                                                                                                                                                                                                                                                                                                                                                                                                                                                                                                                                                                                                                                                                                                                                                            |
| Q16739 | 2    | 15668227;15229242                                                                                                                                                                                                                                                                                                                                                                                                                                                                                                                                                                                                                                                                                                                                                                                                                                                                                                                                                                                                                                                                                                                                                                                                                                                                                |
| Q16836 | 1    | 23011062                                                                                                                                                                                                                                                                                                                                                                                                                                                                                                                                                                                                                                                                                                                                                                                                                                                                                                                                                                                                                                                                                                                                                                                                                                                                                         |
| Q3LIF1 | 56   | 23790207;23642707;23592243;23036616;22350947;22178331;21995852;21815784;21699896;21530508;21110803;20590535;20582944;20515570;20484625;20478301;20374087;19757023;19372269;19291225;18930141;18820405;18703145;18508036;18215231;18194520;17975707;17724451;17429219;17394135;17141961;16697217;16629624;16173073;16092935;15634734;15525355;15525289;15504325;15128857;14697671;14618270;14563689;12812757;12718856;12718855;12718854;12658441;12431229;12037567;11978832;11752461;11690617;11331396;11358445;11050127                                                                                                                                                                                                                                                                                                                                                                                                                                                                                                                                                                                                                                                                                                                                                                          |
| Q53EL6 | 2    | 23647386;20816819                                                                                                                                                                                                                                                                                                                                                                                                                                                                                                                                                                                                                                                                                                                                                                                                                                                                                                                                                                                                                                                                                                                                                                                                                                                                                |
| Q58F15 | 15   | 20949525;12075988;23557244;22824304;22629434;22193443;21931787;20202079;20170651;17970742;17418490;16959251;16623828;15537875;21603973                                                                                                                                                                                                                                                                                                                                                                                                                                                                                                                                                                                                                                                                                                                                                                                                                                                                                                                                                                                                                                                                                                                                                           |
| Q5T230 | 1    | 19476208                                                                                                                                                                                                                                                                                                                                                                                                                                                                                                                                                                                                                                                                                                                                                                                                                                                                                                                                                                                                                                                                                                                                                                                                                                                                                         |
| Q5T4W7 | 3    | 22137336;19293775;16022680                                                                                                                                                                                                                                                                                                                                                                                                                                                                                                                                                                                                                                                                                                                                                                                                                                                                                                                                                                                                                                                                                                                                                                                                                                                                       |
| Q5TA89 | 1    | 22452482                                                                                                                                                                                                                                                                                                                                                                                                                                                                                                                                                                                                                                                                                                                                                                                                                                                                                                                                                                                                                                                                                                                                                                                                                                                                                         |
| Q5XPI4 | 1    | 21229311                                                                                                                                                                                                                                                                                                                                                                                                                                                                                                                                                                                                                                                                                                                                                                                                                                                                                                                                                                                                                                                                                                                                                                                                                                                                                         |
| Q63HR2 | 4    | 24068802;23726960;23647386;16003541                                                                                                                                                                                                                                                                                                                                                                                                                                                                                                                                                                                                                                                                                                                                                                                                                                                                                                                                                                                                                                                                                                                                                                                                                                                              |
| Q6NW40 | 1    | 19324014                                                                                                                                                                                                                                                                                                                                                                                                                                                                                                                                                                                                                                                                                                                                                                                                                                                                                                                                                                                                                                                                                                                                                                                                                                                                                         |
| Q6RSH7 | 1    | 19838135                                                                                                                                                                                                                                                                                                                                                                                                                                                                                                                                                                                                                                                                                                                                                                                                                                                                                                                                                                                                                                                                                                                                                                                                                                                                                         |
| Q6UVK1 | 139  | 23562508;23499793;23447612;23320533;23289019;23169458;23066785;23061434;23049984;23027386;22917776;22865681;22836147;22728374;22629425;22510563;22500090;22465128;22459192;22265655;22243800;22205935;22042562;22020092;22016526;21970623;21952042;21885201;21871887;21848846;21756907;21753849;21753237;21704617;21674488;21630007;21630006;21596037;21402118;21337374;21283639;21215745;21105148;20925481;20887664;20869112;20620201;20607865;20558254;20552220;20534825;20179269;20155816;20130176;20102265;20079803;20058304;20053907;19960516;19884507;19833921;19793972;19780197;19780196;19659409;19604403;19458241;19319198;19257808;18930033;18926822;18756526;18722369;18715114;18486695;18373483;18353313;18001203;18000864;17936753;17597120;17567803;17540369;17506499;17438016;17432960;17390308;17330874;17329414;17184186;17184184;17141961;17108169;17050723;17014846;16965762;16902766;16862564;16705682;16691121;16672645;16632872;16629625;16624960;16503802;16367770;16240391;16087243;16051494;16005441;15869942;15845083;15755547;15739189;15736057;15390101;15378660;15145083;15080887;15016081;14993064;14960611;14561854;14534257;14534158;12895450;12821386;12691734;12526031;12440375;11948352;11923444;11331369;11273643;11011818;10630190;10483914;9878200;9417833 |
| Q6UXS9 | 4    | 21807380;19215662;17672973;17578450                                                                                                                                                                                                                                                                                                                                                                                                                                                                                                                                                                                                                                                                                                                                                                                                                                                                                                                                                                                                                                                                                                                                                                                                                                                              |
| Q76LX8 | 1    | 22425718                                                                                                                                                                                                                                                                                                                                                                                                                                                                                                                                                                                                                                                                                                                                                                                                                                                                                                                                                                                                                                                                                                                                                                                                                                                                                         |
| Q7Z444 | 3    | 19476208;17961063;15264780                                                                                                                                                                                                                                                                                                                                                                                                                                                                                                                                                                                                                                                                                                                                                                                                                                                                                                                                                                                                                                                                                                                                                                                                                                                                       |
| Q86UN2 | 1    | 22023338                                                                                                                                                                                                                                                                                                                                                                                                                                                                                                                                                                                                                                                                                                                                                                                                                                                                                                                                                                                                                                                                                                                                                                                                                                                                                         |
| Q86UN3 | 5    | 22836147;21699896;20815818;17234430;22023338                                                                                                                                                                                                                                                                                                                                                                                                                                                                                                                                                                                                                                                                                                                                                                                                                                                                                                                                                                                                                                                                                                                                                                                                                                                     |
| Q86V65 | #N/A | 21297958                                                                                                                                                                                                                                                                                                                                                                                                                                                                                                                                                                                                                                                                                                                                                                                                                                                                                                                                                                                                                                                                                                                                                                                                                                                                                         |
| Q86V67 | 11   | 23499793;23295392;23028463;22865690;21355819;20338167;19635528;18455876;18289533;15173585;11773606                                                                                                                                                                                                                                                                                                                                                                                                                                                                                                                                                                                                                                                                                                                                                                                                                                                                                                                                                                                                                                                                                                                                                                                               |
| Q86VB7 | 2    | 23775900;17882014                                                                                                                                                                                                                                                                                                                                                                                                                                                                                                                                                                                                                                                                                                                                                                                                                                                                                                                                                                                                                                                                                                                                                                                                                                                                                |
| Q86W47 | 1    | 22534235                                                                                                                                                                                                                                                                                                                                                                                                                                                                                                                                                                                                                                                                                                                                                                                                                                                                                                                                                                                                                                                                                                                                                                                                                                                                                         |

|        |      |                                                                                                                                                                                                                                                                                                                                                                                                                                                                                                                                                                                                                      |
|--------|------|----------------------------------------------------------------------------------------------------------------------------------------------------------------------------------------------------------------------------------------------------------------------------------------------------------------------------------------------------------------------------------------------------------------------------------------------------------------------------------------------------------------------------------------------------------------------------------------------------------------------|
| Q86W56 | 1    | 16825529                                                                                                                                                                                                                                                                                                                                                                                                                                                                                                                                                                                                             |
| Q86Y38 | 5    | 23027386;22721770;21885201;18765417;14960611                                                                                                                                                                                                                                                                                                                                                                                                                                                                                                                                                                         |
| Q86YM7 | 1    | 23386718                                                                                                                                                                                                                                                                                                                                                                                                                                                                                                                                                                                                             |
| Q8BIF2 | 4    | 18354017;17392476;15892602;15129757                                                                                                                                                                                                                                                                                                                                                                                                                                                                                                                                                                                  |
| Q8IUQ4 | 1    | 21336655                                                                                                                                                                                                                                                                                                                                                                                                                                                                                                                                                                                                             |
| Q8IWA4 | 1    | 23727406                                                                                                                                                                                                                                                                                                                                                                                                                                                                                                                                                                                                             |
| Q8N5V2 | 2    | 20949525;20202079                                                                                                                                                                                                                                                                                                                                                                                                                                                                                                                                                                                                    |
| Q8NAP3 | 1    | 22427977                                                                                                                                                                                                                                                                                                                                                                                                                                                                                                                                                                                                             |
| Q8NER1 | 12   | 17108828;23108547;22037502;21265596;20970752;18824169;18321652;18293403;18249134;17542507;17346705;15998524                                                                                                                                                                                                                                                                                                                                                                                                                                                                                                          |
| Q8NII7 | 1    | 21611127                                                                                                                                                                                                                                                                                                                                                                                                                                                                                                                                                                                                             |
| Q8TAK6 | 1    | 21538562                                                                                                                                                                                                                                                                                                                                                                                                                                                                                                                                                                                                             |
| Q8TCU5 | 69   | 23618680;22650041;22650040;22449374;22402659;21756907;20675200;20495588;20211179;19939961;19923273;19772458;19668258;19407255;19026989;19019202;19005051;18635178;18484790;18177675;18053028;17983769;17287199;16703907;16678969;15950221;15901762;15748877;15640756;15313031;14758350;12903514;12885421;12162901;11992467;11107569;11101210;11043549;11007881;10984543;10720616;10674755;10486193;10419375;9918969;9773443;10921077;9048311;9002066;8985951;9594166;8880851;8657340;8584148;7472559;7889371;8207481;7909561;8137170;8103243;1588610;1311880;1837648;2163498;2155794;2377900;1982014;2841902;3057216 |
| Q8TD08 | 15   | 22865681;23361876;22733360;22634758;21310020;20536940;20444938;20381564;19383246;19196180;19090911;18630599;17329433;15707984;11031088                                                                                                                                                                                                                                                                                                                                                                                                                                                                               |
| Q8TD43 | 4    | 23255597;23255597;22177998;19169264                                                                                                                                                                                                                                                                                                                                                                                                                                                                                                                                                                                  |
| Q92186 | 3    | 22460918;21264949;17363265                                                                                                                                                                                                                                                                                                                                                                                                                                                                                                                                                                                           |
| Q92562 | 1    | 22157617                                                                                                                                                                                                                                                                                                                                                                                                                                                                                                                                                                                                             |
| Q92570 | 2    | 17881483;17201484                                                                                                                                                                                                                                                                                                                                                                                                                                                                                                                                                                                                    |
| Q92633 | 1    | 20495828                                                                                                                                                                                                                                                                                                                                                                                                                                                                                                                                                                                                             |
| Q92686 | 1    | 10737454                                                                                                                                                                                                                                                                                                                                                                                                                                                                                                                                                                                                             |
| Q92731 | 2    | 22700771;16902996                                                                                                                                                                                                                                                                                                                                                                                                                                                                                                                                                                                                    |
| Q92752 | 9    | 22902990;19757023;19337830;19150614;16870730;15525355;11733702;11085900;10483914                                                                                                                                                                                                                                                                                                                                                                                                                                                                                                                                     |
| Q92854 | 1    | 14534257                                                                                                                                                                                                                                                                                                                                                                                                                                                                                                                                                                                                             |
| Q92876 | 9    | 24128681;24128681;23832758;23647384;23376368;16987227;11186232;23832758;23647384                                                                                                                                                                                                                                                                                                                                                                                                                                                                                                                                     |
| Q92886 | 1    | 22182208                                                                                                                                                                                                                                                                                                                                                                                                                                                                                                                                                                                                             |
| Q92913 | 1    | 18581269                                                                                                                                                                                                                                                                                                                                                                                                                                                                                                                                                                                                             |
| Q92934 | 36   | 22982298;22865656;22409448;22253859;21970623;21496122;20678995;20585375;19533653;19176818;19109493;18785877;18768685;18305238;18236467;17885021;17553847;17457363;17233289;16957585;16511963;15896972;23731227;23433337;23344852;22453521;19716366;19530162;19228956;19120440;18354017;18302959;17600519;17551978;15668909;11721745                                                                                                                                                                                                                                                                                  |
| Q93063 | 1    | 23217490                                                                                                                                                                                                                                                                                                                                                                                                                                                                                                                                                                                                             |
| Q969P5 | 4    | 21221630;19533653;18653749;17218363                                                                                                                                                                                                                                                                                                                                                                                                                                                                                                                                                                                  |
| Q969Q1 | 7    | 21854445;21221630;19533653;19214561;18653749;18236467;17218363                                                                                                                                                                                                                                                                                                                                                                                                                                                                                                                                                       |
| Q96B36 | 1    | 17457363                                                                                                                                                                                                                                                                                                                                                                                                                                                                                                                                                                                                             |
| Q96B86 | 8    | 22530947;19524014;19208000;17990222;17092017;17109551;16585208;15845084                                                                                                                                                                                                                                                                                                                                                                                                                                                                                                                                              |
| Q96BE9 | #N/A | 22510563;12666113                                                                                                                                                                                                                                                                                                                                                                                                                                                                                                                                                                                                    |

|        |     |                                                                                                                                                                                                                                                                                                                                                                                                                                                                                                                                                                                                                                                                                                                                                                                                                                                                                                                                                                                                                                                                                                                                                                                                                                                                                                                                                                                                                                                                                                                          |
|--------|-----|--------------------------------------------------------------------------------------------------------------------------------------------------------------------------------------------------------------------------------------------------------------------------------------------------------------------------------------------------------------------------------------------------------------------------------------------------------------------------------------------------------------------------------------------------------------------------------------------------------------------------------------------------------------------------------------------------------------------------------------------------------------------------------------------------------------------------------------------------------------------------------------------------------------------------------------------------------------------------------------------------------------------------------------------------------------------------------------------------------------------------------------------------------------------------------------------------------------------------------------------------------------------------------------------------------------------------------------------------------------------------------------------------------------------------------------------------------------------------------------------------------------------------|
| Q96C10 | 1   | 22161971                                                                                                                                                                                                                                                                                                                                                                                                                                                                                                                                                                                                                                                                                                                                                                                                                                                                                                                                                                                                                                                                                                                                                                                                                                                                                                                                                                                                                                                                                                                 |
| Q96DB9 | 1   | 22275761                                                                                                                                                                                                                                                                                                                                                                                                                                                                                                                                                                                                                                                                                                                                                                                                                                                                                                                                                                                                                                                                                                                                                                                                                                                                                                                                                                                                                                                                                                                 |
| Q96EB6 | 1   | 23055316                                                                                                                                                                                                                                                                                                                                                                                                                                                                                                                                                                                                                                                                                                                                                                                                                                                                                                                                                                                                                                                                                                                                                                                                                                                                                                                                                                                                                                                                                                                 |
| Q96FE5 | 8   | 23211430,21306793,21110803,20203333,17913708,17900034,17234430,170112                                                                                                                                                                                                                                                                                                                                                                                                                                                                                                                                                                                                                                                                                                                                                                                                                                                                                                                                                                                                                                                                                                                                                                                                                                                                                                                                                                                                                                                    |
| Q96FF9 | 8   | 19440017,17430833,13840791,13713081,13707984,14330278,13713081,137130                                                                                                                                                                                                                                                                                                                                                                                                                                                                                                                                                                                                                                                                                                                                                                                                                                                                                                                                                                                                                                                                                                                                                                                                                                                                                                                                                                                                                                                    |
| Q96GW7 | 167 | 24478364;24044287;23861090;23839053;23790207;23702616;23642707;23562508;23520469;23447612;23289019;23066785;23061434;23049984;23027386;23022460;22978525;22917776;22836147;22728374;22723886;22684804;22629425;22525836;22465128;22420304;22350947;22343313;22265655;22205935;22137336;22133879;22079829;22042562;22020092;22016526;21970342;21952042;21946272;21898827;21885201;21871887;21848846;21783247;21756907;21753849;21753237;21674488;21630006;21596037;21486314;21402118;21360238;21316362;21283639;21273450;21264949;21215745;21105148;21092402;20925481;20887664;20869112;20620201;20558254;20552220;20534825;20179269;20130176;20102265;20079803;20053907;19955379;19940184;19884507;19833921;19793972;19780196;19672039;19659409;19631747;19604403;19603426;19522780;19382871;19165795;19125588;19074020;19005065;18930033;18926822;18786615;18768685;18765417;18722369;18715114;18486695;18484102;18373483;18353313;18065151;18001203;18000864;17936753;17597120;17585905;17567803;17540369;17438016;17329414;17223033;17184186;17141961;17050723;17005848;16965762;16902766;16862564;16837588;16705682;16691121;16672645;16629625;16629623;16624960;16367770;16240391;16099038;15998793;15869942;15755547;15736057;15716629;15672632;15530871;15341588;15307905;15174067;15145083;15128857;15080887;15016081;14993064;14960611;14561854;14534158;12895450;12821386;12811811;12691734;12573465;12526031;12440375;12151546;12151536;12040068;11948352;11923444;11425904;11273643;11011818;10630190;104839 |
| Q96HS1 | 2   | 20001688;23731227                                                                                                                                                                                                                                                                                                                                                                                                                                                                                                                                                                                                                                                                                                                                                                                                                                                                                                                                                                                                                                                                                                                                                                                                                                                                                                                                                                                                                                                                                                        |
| Q96KE0 | 1   | 16145477                                                                                                                                                                                                                                                                                                                                                                                                                                                                                                                                                                                                                                                                                                                                                                                                                                                                                                                                                                                                                                                                                                                                                                                                                                                                                                                                                                                                                                                                                                                 |
| Q96NK8 | 1   | 22466292                                                                                                                                                                                                                                                                                                                                                                                                                                                                                                                                                                                                                                                                                                                                                                                                                                                                                                                                                                                                                                                                                                                                                                                                                                                                                                                                                                                                                                                                                                                 |
| Q96P20 | 1   | 22733360                                                                                                                                                                                                                                                                                                                                                                                                                                                                                                                                                                                                                                                                                                                                                                                                                                                                                                                                                                                                                                                                                                                                                                                                                                                                                                                                                                                                                                                                                                                 |
| Q96QT4 | 1   | 23828570                                                                                                                                                                                                                                                                                                                                                                                                                                                                                                                                                                                                                                                                                                                                                                                                                                                                                                                                                                                                                                                                                                                                                                                                                                                                                                                                                                                                                                                                                                                 |
| Q99062 | 20  | 23433334;23419550;23209732;23139012;23101949;22862301;22391867;22024901;21935680;21721873;20887150;20202082;19499175;18406145;17882016;17679775;17618991;17391650;16958589;12201902                                                                                                                                                                                                                                                                                                                                                                                                                                                                                                                                                                                                                                                                                                                                                                                                                                                                                                                                                                                                                                                                                                                                                                                                                                                                                                                                      |
| Q99259 | 13  | 20663524;20132484;20059302;19225548;18480373;18353556;18180106;16626970;15233942;10740227;10619473;23152062;21620945                                                                                                                                                                                                                                                                                                                                                                                                                                                                                                                                                                                                                                                                                                                                                                                                                                                                                                                                                                                                                                                                                                                                                                                                                                                                                                                                                                                                     |
| Q99453 | 1   | 22673527                                                                                                                                                                                                                                                                                                                                                                                                                                                                                                                                                                                                                                                                                                                                                                                                                                                                                                                                                                                                                                                                                                                                                                                                                                                                                                                                                                                                                                                                                                                 |
| Q99527 | 6   | 20456002;20350367;17704735;16902996;23164781;22975889                                                                                                                                                                                                                                                                                                                                                                                                                                                                                                                                                                                                                                                                                                                                                                                                                                                                                                                                                                                                                                                                                                                                                                                                                                                                                                                                                                                                                                                                    |
| Q99571 | 3   | 23404572;22378878;15885321                                                                                                                                                                                                                                                                                                                                                                                                                                                                                                                                                                                                                                                                                                                                                                                                                                                                                                                                                                                                                                                                                                                                                                                                                                                                                                                                                                                                                                                                                               |
| Q99572 | 8   | 23487731,22973433,22399733,22378878,22078700,20070803,19000023,132383                                                                                                                                                                                                                                                                                                                                                                                                                                                                                                                                                                                                                                                                                                                                                                                                                                                                                                                                                                                                                                                                                                                                                                                                                                                                                                                                                                                                                                                    |
| Q99574 | 1   | 23163103                                                                                                                                                                                                                                                                                                                                                                                                                                                                                                                                                                                                                                                                                                                                                                                                                                                                                                                                                                                                                                                                                                                                                                                                                                                                                                                                                                                                                                                                                                                 |
| Q99576 | 1   | 22125095                                                                                                                                                                                                                                                                                                                                                                                                                                                                                                                                                                                                                                                                                                                                                                                                                                                                                                                                                                                                                                                                                                                                                                                                                                                                                                                                                                                                                                                                                                                 |
| Q99683 | 2   | 18708926;10331432                                                                                                                                                                                                                                                                                                                                                                                                                                                                                                                                                                                                                                                                                                                                                                                                                                                                                                                                                                                                                                                                                                                                                                                                                                                                                                                                                                                                                                                                                                        |
| Q99714 | 1   | 23011062                                                                                                                                                                                                                                                                                                                                                                                                                                                                                                                                                                                                                                                                                                                                                                                                                                                                                                                                                                                                                                                                                                                                                                                                                                                                                                                                                                                                                                                                                                                 |
| Q99748 | 1   | 21196217                                                                                                                                                                                                                                                                                                                                                                                                                                                                                                                                                                                                                                                                                                                                                                                                                                                                                                                                                                                                                                                                                                                                                                                                                                                                                                                                                                                                                                                                                                                 |
| Q99836 | 2   | 19932745;17403033                                                                                                                                                                                                                                                                                                                                                                                                                                                                                                                                                                                                                                                                                                                                                                                                                                                                                                                                                                                                                                                                                                                                                                                                                                                                                                                                                                                                                                                                                                        |
| Q99941 | 3   | 22873727;21933012;21638341                                                                                                                                                                                                                                                                                                                                                                                                                                                                                                                                                                                                                                                                                                                                                                                                                                                                                                                                                                                                                                                                                                                                                                                                                                                                                                                                                                                                                                                                                               |

|        |    |                                                                                                                                                                                                                                                                                                                                                                                                                                                                            |
|--------|----|----------------------------------------------------------------------------------------------------------------------------------------------------------------------------------------------------------------------------------------------------------------------------------------------------------------------------------------------------------------------------------------------------------------------------------------------------------------------------|
| Q99942 | 21 | 23447612;22993437;21970342;21470565;19458241;17601981;17506499;17239557;17184184;17141961;16902766;16874803;16691121;16503802;15869942;15845083;15378660;15080887;14561854;11331369;11273643                                                                                                                                                                                                                                                                               |
| Q99985 | 2  | 12009760;18308469                                                                                                                                                                                                                                                                                                                                                                                                                                                          |
| Q9BPU6 | 1  | 22181040                                                                                                                                                                                                                                                                                                                                                                                                                                                                   |
| Q9BSL1 | 1  | 21229311                                                                                                                                                                                                                                                                                                                                                                                                                                                                   |
| Q9BU40 | 1  | 20459000                                                                                                                                                                                                                                                                                                                                                                                                                                                                   |
| Q9BX97 | 1  | 20590523                                                                                                                                                                                                                                                                                                                                                                                                                                                                   |
| Q9BXH1 | 1  | 23492769                                                                                                                                                                                                                                                                                                                                                                                                                                                                   |
| Q9BXW4 | 1  | 22082874                                                                                                                                                                                                                                                                                                                                                                                                                                                                   |
| Q9BYX4 | 2  | 22161971;22161971                                                                                                                                                                                                                                                                                                                                                                                                                                                          |
| Q9BZR6 | 51 | 15031718;23592243;22836147;22827732;22728374;22236767;22162062;22023338;21891937;21815784;21784510;21699896;21176674;21110803;21087927;20819171;20815818;20809785;20725955;20702718;20484625;20203533;20179954;20092707;19439611;18930141;18820405;18692574;18394723;18234196;18056009;17913768;17630211;17567803;17362886;17234430;17011208;16958113;16497507;16101740;16092935;15866044;15548666;15504325;14668808;14618270;12764110;12658441;12037567;20702718;16092935 |
| Q9C000 | 1  | 22378878                                                                                                                                                                                                                                                                                                                                                                                                                                                                   |
| Q9GZQ8 | 6  | 23852559;22082874;21854445;21806471;21304420;20210855                                                                                                                                                                                                                                                                                                                                                                                                                      |
| Q9GZZ7 | 2  | 19235905;16187294                                                                                                                                                                                                                                                                                                                                                                                                                                                          |
| Q9H244 | 1  | 21647706                                                                                                                                                                                                                                                                                                                                                                                                                                                                   |
| Q9H2A3 | 2  | 18635866;17108169                                                                                                                                                                                                                                                                                                                                                                                                                                                          |
| Q9H2U1 | 2  | 22853439;21806470                                                                                                                                                                                                                                                                                                                                                                                                                                                          |
| Q9H2X9 | 6  | 23248270;21333799;20536931;20190766;18845615;18799000                                                                                                                                                                                                                                                                                                                                                                                                                      |
| Q9H3M7 | 1  | 22981449                                                                                                                                                                                                                                                                                                                                                                                                                                                                   |
| Q9H4L4 | 1  | 23054070                                                                                                                                                                                                                                                                                                                                                                                                                                                                   |
| Q9H598 | 3  | 21620945;16300756;11723173                                                                                                                                                                                                                                                                                                                                                                                                                                                 |
| Q9H633 | 6  | 17376001;12611774;12060811;10886684;10709875;10586102                                                                                                                                                                                                                                                                                                                                                                                                                      |
| Q9H9S0 | 6  | 23419261;20875224;20161735;20030221;19476208;18712509                                                                                                                                                                                                                                                                                                                                                                                                                      |
| Q9HBA0 | 1  | 18206306                                                                                                                                                                                                                                                                                                                                                                                                                                                                   |
| Q9HBW0 | 1  | 20495828                                                                                                                                                                                                                                                                                                                                                                                                                                                                   |
| Q9HCM2 | 1  | 20702718                                                                                                                                                                                                                                                                                                                                                                                                                                                                   |
| Q9HD89 | 1  | 22815920                                                                                                                                                                                                                                                                                                                                                                                                                                                                   |
| Q9NP80 | 1  | 21868473                                                                                                                                                                                                                                                                                                                                                                                                                                                                   |
| Q9NPA1 | 1  | 22534235                                                                                                                                                                                                                                                                                                                                                                                                                                                                   |
| Q9NPG1 | 1  | 21196217                                                                                                                                                                                                                                                                                                                                                                                                                                                                   |
| Q9NPG2 | 2  | 23658829;22105458                                                                                                                                                                                                                                                                                                                                                                                                                                                          |
| Q9NPH5 | 1  | 23152062                                                                                                                                                                                                                                                                                                                                                                                                                                                                   |
| Q9NQB0 | 2  | 20849836;18236467                                                                                                                                                                                                                                                                                                                                                                                                                                                          |

|        |    |                                                                                                                                                                                                                                                                                                                                                                                                                                                                                                                                                                                                                                                                                                                                                          |
|--------|----|----------------------------------------------------------------------------------------------------------------------------------------------------------------------------------------------------------------------------------------------------------------------------------------------------------------------------------------------------------------------------------------------------------------------------------------------------------------------------------------------------------------------------------------------------------------------------------------------------------------------------------------------------------------------------------------------------------------------------------------------------------|
| Q9NQC3 | 81 | 23790207;23211464;23158140;23036616;22980985;22306041;22236767;22162062;22137336;21995852;21815784;21596039;21530508;21176674;21087927;20849836;20725955;20702718;20673791;20590535;20547125;20515570;20484625;19955379;19619659;19587271;19442692;19436077;19372269;19337830;19291225;19158290;18980476;18980474;18930141;18820405;18703145;18508036;18394723;18341395;18221191;18194520;18056009;17975707;17913768;17692017;17538769;17429219;17394135;17011208;16998900;16697217;16629624;16497507;16324097;16173073;16101740;16092935;15866044;15799964;15548666;15525289;15504325;15031718;14618270;14563689;12812757;12764110;12718856;12718855;12718854;12658441;12598630;12183616;12037567;11978832;11752461;11358445;11343640;20702718;16092935 |
| Q9NR23 | 1  | 20875224                                                                                                                                                                                                                                                                                                                                                                                                                                                                                                                                                                                                                                                                                                                                                 |
| Q9NR96 | 1  | 23313320                                                                                                                                                                                                                                                                                                                                                                                                                                                                                                                                                                                                                                                                                                                                                 |
| Q9NR97 | 1  | 19688331                                                                                                                                                                                                                                                                                                                                                                                                                                                                                                                                                                                                                                                                                                                                                 |
| Q9NRA1 | 14 | 22407783;22236767;21568693;20819515;19818206;19383401;17597120;14534257;10329979;9618703;8963994;7657809;8091423;18925432                                                                                                                                                                                                                                                                                                                                                                                                                                                                                                                                                                                                                                |
| Q9NRD8 | 5  | 21394541;19056384;17071951;15992367;15036352                                                                                                                                                                                                                                                                                                                                                                                                                                                                                                                                                                                                                                                                                                             |
| Q9NTK1 | 1  | 22815920                                                                                                                                                                                                                                                                                                                                                                                                                                                                                                                                                                                                                                                                                                                                                 |
| Q9NWT6 | 8  | 23234244;21551019;20010584;19070458;15005420;15101088;12599425;11904072                                                                                                                                                                                                                                                                                                                                                                                                                                                                                                                                                                                                                                                                                  |
| Q9NXG6 | 2  | 19076458;11564534                                                                                                                                                                                                                                                                                                                                                                                                                                                                                                                                                                                                                                                                                                                                        |
| Q9NZ45 | 1  | 23627890                                                                                                                                                                                                                                                                                                                                                                                                                                                                                                                                                                                                                                                                                                                                                 |
| Q9NZJ5 | 7  | 22873727;22815920;21933012;21638341;18785877;18630599;16478624                                                                                                                                                                                                                                                                                                                                                                                                                                                                                                                                                                                                                                                                                           |
| Q9NZK7 | 1  | 19306380                                                                                                                                                                                                                                                                                                                                                                                                                                                                                                                                                                                                                                                                                                                                                 |
| Q9NZQ7 | 1  | 21481304                                                                                                                                                                                                                                                                                                                                                                                                                                                                                                                                                                                                                                                                                                                                                 |
| Q9P0K8 | 1  | 22246994                                                                                                                                                                                                                                                                                                                                                                                                                                                                                                                                                                                                                                                                                                                                                 |
| Q9P0X4 | 1  | 19005061                                                                                                                                                                                                                                                                                                                                                                                                                                                                                                                                                                                                                                                                                                                                                 |
| Q9P2N4 | 2  | 23562508;23562508                                                                                                                                                                                                                                                                                                                                                                                                                                                                                                                                                                                                                                                                                                                                        |
| Q9P2U7 | 5  | 23061434;22171058;21697383;17577523;17134699                                                                                                                                                                                                                                                                                                                                                                                                                                                                                                                                                                                                                                                                                                             |
| Q9P2U8 | 2  | 17577523;16300756                                                                                                                                                                                                                                                                                                                                                                                                                                                                                                                                                                                                                                                                                                                                        |
| Q9UBC3 | 1  | 20875224                                                                                                                                                                                                                                                                                                                                                                                                                                                                                                                                                                                                                                                                                                                                                 |
| Q9UBK2 | 2  | 22208735;21171097                                                                                                                                                                                                                                                                                                                                                                                                                                                                                                                                                                                                                                                                                                                                        |
| Q9UBL9 | 2  | 21647706;22540742                                                                                                                                                                                                                                                                                                                                                                                                                                                                                                                                                                                                                                                                                                                                        |
| Q9UBS5 | 5  | 18495826;23904624;22721766;22449374;16866624                                                                                                                                                                                                                                                                                                                                                                                                                                                                                                                                                                                                                                                                                                             |
| Q9UBU3 | 5  | 22194122;21625243;20497419;20444938;16213239                                                                                                                                                                                                                                                                                                                                                                                                                                                                                                                                                                                                                                                                                                             |
| Q9UBY5 | 1  | 20495828                                                                                                                                                                                                                                                                                                                                                                                                                                                                                                                                                                                                                                                                                                                                                 |
| Q9UGI9 | 1  | 24022865                                                                                                                                                                                                                                                                                                                                                                                                                                                                                                                                                                                                                                                                                                                                                 |
| Q9UHD4 | 1  | 16933827                                                                                                                                                                                                                                                                                                                                                                                                                                                                                                                                                                                                                                                                                                                                                 |
| Q9UHI8 | 2  | 23562508;23562508                                                                                                                                                                                                                                                                                                                                                                                                                                                                                                                                                                                                                                                                                                                                        |
| Q9UJY1 | 3  | 23143993;18156166;15221884                                                                                                                                                                                                                                                                                                                                                                                                                                                                                                                                                                                                                                                                                                                               |
| Q9UKJ0 | 3  | 21699896;20714874;20484625                                                                                                                                                                                                                                                                                                                                                                                                                                                                                                                                                                                                                                                                                                                               |
| Q9UKL4 | 1  | 21333809                                                                                                                                                                                                                                                                                                                                                                                                                                                                                                                                                                                                                                                                                                                                                 |
| Q9UKQ9 | 3  | 24128681;24128681;24128681                                                                                                                                                                                                                                                                                                                                                                                                                                                                                                                                                                                                                                                                                                                               |
| Q9UKX2 | 30 | 24022865;23195635;20813653;19705475;19623632;18566944;18372308;17717118;16931550;16778003;16239281;15470819;15468195;15221880;12383078;11994962;11686494;11268024;11216861;11138583;10668768;10567091;10024136;9887150;9755066;9044514;9025213;8756163;8596693;8722515                                                                                                                                                                                                                                                                                                                                                                                                                                                                                   |
| Q9UKX3 | 1  | 20813653                                                                                                                                                                                                                                                                                                                                                                                                                                                                                                                                                                                                                                                                                                                                                 |
| Q9UL19 | 1  | 22161971                                                                                                                                                                                                                                                                                                                                                                                                                                                                                                                                                                                                                                                                                                                                                 |

|        |    |                                                                                                                                                                                                                         |
|--------|----|-------------------------------------------------------------------------------------------------------------------------------------------------------------------------------------------------------------------------|
| Q9UM11 | 1  | 21679705                                                                                                                                                                                                                |
| Q9UM81 | 1  | 19833921                                                                                                                                                                                                                |
| Q9UN79 | 1  | 23169458                                                                                                                                                                                                                |
| Q9UNA0 | 3  | 23562508;23562508;23562508                                                                                                                                                                                              |
| Q9UNG2 | 2  | 20107429;18322000                                                                                                                                                                                                       |
| Q9UQD0 | 1  | 21177993                                                                                                                                                                                                                |
| Q9UQM7 | 14 | 19332038;17258865;23707296;22911773;22384207;22296735;22027236;21167847;20070863;19409102;19332038;17719180;17592948;17258865                                                                                           |
| Q9UQQ2 | 1  | 19859984                                                                                                                                                                                                                |
| Q9Y243 | 24 | 22253859;20678995;22982298;22865656;22409448;22253859;21970623;21496122;20678995;20585375;19533653;19176818;19109493;18785877;18768685;18305238;18236467;17885021;17553847;17457363;17233289;16957585;16511963;15806072 |
| Q9Y275 | 1  | 23088438                                                                                                                                                                                                                |
| Q9Y2C9 | 1  | 21970496                                                                                                                                                                                                                |
| Q9Y2I1 | 3  | 22985669;21303658;12079683                                                                                                                                                                                              |
| Q9Y314 | 1  | 23135205                                                                                                                                                                                                                |
| Q9Y337 | 2  | 24128681;24128681                                                                                                                                                                                                       |
| Q9Y345 | 3  | 21620945;22171058;17134699                                                                                                                                                                                              |
| Q9Y3D6 | 1  | 23727406                                                                                                                                                                                                                |
| Q9Y466 | 1  | 21258860                                                                                                                                                                                                                |
| Q9Y478 | 3  | 24022865;22865656;17885021                                                                                                                                                                                              |
| Q9Y5N1 | 1  | 16671478                                                                                                                                                                                                                |
| Q9Y5U5 | 1  | 18322000                                                                                                                                                                                                                |
| Q9Y5Y9 | 2  | 20566409;12560118                                                                                                                                                                                                       |
| Q9Y691 | 1  | 22534235                                                                                                                                                                                                                |
| Q9Y6E0 | 1  | 19855390                                                                                                                                                                                                                |
| Q9Y6M5 | 3  | 22565470;21752551;20838921                                                                                                                                                                                              |
| Q9Y6N7 | 2  | 19783284;19783284                                                                                                                                                                                                       |
