# Supplementary material for: Molecular Architecture of Spinal Cord Injury Protein Interaction Network
Source: PubMed Central journal article supplement (PMC4524728; doi:10.1371/journal.pone.0135024), 2015-08-04
Supplement: pone.0135024.s006.pdf [file pone.0135024.s006.pdf]

**Supplementary Table IV. Gene Ontology (GO) biological processes over-representation in the entire 1083 accessions performed through DAVID.**

| Category      | Term                                                               | Count | %    | PValue   | Fold Enrichment | Bonferroni | Benjamini | FDR      |
|---------------|--------------------------------------------------------------------|-------|------|----------|-----------------|------------|-----------|----------|
| GOTERM_BP_FAT | GO:0009611~response to wounding                                    | 198   | 18.5 | 3.70E-88 | 4.901897773     | 1.71E-84   | 1.71E-84  | 6.98E-85 |
| GOTERM_BP_FAT | GO:0010033~response to organic substance                           | 228   | 21.3 | 1.51E-85 | 4.1492969       | 6.96E-82   | 3.48E-82  | 2.85E-82 |
| GOTERM_BP_FAT | GO:0010941~regulation of cell death                                | 240   | 22.4 | 3.27E-83 | 3.863923881     | 1.51E-79   | 5.03E-80  | 6.17E-80 |
| GOTERM_BP_FAT | GO:0042127~regulation of cell proliferation                        | 235   | 21.9 | 1.11E-82 | 3.918032726     | 5.10E-79   | 1.28E-79  | 2.09E-79 |
| GOTERM_BP_FAT | GO:0043067~regulation of programmed cell death                     | 238   | 22.2 | 5.46E-82 | 3.845881133     | 2.52E-78   | 5.03E-79  | 1.03E-78 |
| GOTERM_BP_FAT | GO:0042981~regulation of apoptosis                                 | 234   | 21.8 | 8.41E-80 | 3.818868799     | 3.88E-76   | 6.47E-77  | 1.59E-76 |
| GOTERM_BP_FAT | GO:0007267~cell-cell signaling                                     | 190   | 17.7 | 1.92E-70 | 4.155059812     | 8.86E-67   | 1.27E-67  | 3.62E-67 |
| GOTERM_BP_FAT | GO:0007610~behavior                                                | 167   | 15.6 | 5.32E-70 | 4.672169153     | 2.46E-66   | 3.07E-67  | 1.00E-66 |
| GOTERM_BP_FAT | GO:0008284~positive regulation of cell proliferation               | 150   | 14   | 9.72E-64 | 4.754073012     | 4.48E-60   | 4.98E-61  | 1.83E-60 |
| GOTERM_BP_FAT | GO:0009719~response to endogenous stimulus                         | 146   | 13.6 | 1.22E-61 | 4.73012657      | 5.62E-58   | 5.62E-59  | 2.30E-58 |
| GOTERM_BP_FAT | GO:0044057~regulation of system process                            | 127   | 11.9 | 4.65E-61 | 5.392872725     | 2.15E-57   | 1.95E-58  | 8.78E-58 |
| GOTERM_BP_FAT | GO:0042592~homeostatic process                                     | 198   | 18.5 | 8.49E-59 | 3.459395232     | 3.92E-55   | 3.27E-56  | 1.60E-55 |
| GOTERM_BP_FAT | GO:0044093~positive regulation of molecular function               | 170   | 15.9 | 1.92E-56 | 3.806503511     | 8.84E-53   | 6.80E-54  | 3.61E-53 |
| GOTERM_BP_FAT | GO:0051240~positive regulation of multicellular organismal process | 108   | 10.1 | 1.36E-55 | 5.807762637     | 6.28E-52   | 4.48E-53  | 2.57E-52 |
| GOTERM_BP_FAT | GO:0010647~positive regulation of cell communication               | 125   | 11.7 | 1.79E-55 | 4.985274131     | 8.24E-52   | 5.49E-53  | 3.37E-52 |
| GOTERM_BP_FAT | GO:0051174~regulation of phosphorus metabolic process              | 151   | 14.1 | 3.07E-54 | 4.085170038     | 1.42E-50   | 8.85E-52  | 5.79E-51 |
| GOTERM_BP_FAT | GO:0019220~regulation of phosphate metabolic process               | 151   | 14.1 | 3.07E-54 | 4.085170038     | 1.42E-50   | 8.85E-52  | 5.79E-51 |
| GOTERM_BP_FAT | GO:0009725~response to hormone stimulus                            | 130   | 12.1 | 1.19E-53 | 4.647851217     | 5.49E-50   | 3.23E-51  | 2.25E-50 |
| GOTERM_BP_FAT | GO:0042325~regulation of phosphorylation                           | 147   | 13.7 | 1.49E-53 | 4.139104082     | 6.87E-50   | 3.82E-51  | 2.81E-50 |

|               |                                                             |     |      |          |             |          |          |          |
|---------------|-------------------------------------------------------------|-----|------|----------|-------------|----------|----------|----------|
| GOTERM_BP_FAT | GO:0032101~regulation of response to external stimulus      | 86  | 8.03 | 4.51E-53 | 7.097023711 | 2.08E-49 | 1.09E-50 | 8.50E-50 |
| GOTERM_BP_FAT | GO:0043085~positive regulation of catalytic activity        | 155 | 14.5 | 6.05E-53 | 3.911139297 | 2.79E-49 | 1.40E-50 | 1.14E-49 |
| GOTERM_BP_FAT | GO:0007166~cell surface receptor linked signal transduction | 323 | 30.2 | 1.75E-52 | 2.283491923 | 8.09E-49 | 3.85E-50 | 3.31E-49 |
| GOTERM_BP_FAT | GO:0048878~chemical homeostasis                             | 153 | 14.3 | 2.17E-52 | 3.920995999 | 1.00E-48 | 4.55E-50 | 4.10E-49 |
| GOTERM_BP_FAT | GO:0060548~negative regulation of cell death                | 126 | 11.8 | 2.76E-51 | 4.59243453  | 1.27E-47 | 5.53E-49 | 5.21E-48 |
| GOTERM_BP_FAT | GO:0055082~cellular chemical homeostasis                    | 129 | 12   | 8.05E-51 | 4.454316198 | 3.71E-47 | 1.55E-48 | 1.52E-47 |
| GOTERM_BP_FAT | GO:0006954~inflammatory response                            | 119 | 11.1 | 9.49E-51 | 4.804393046 | 4.38E-47 | 1.75E-48 | 1.79E-47 |
| GOTERM_BP_FAT | GO:0043069~negative regulation of programmed cell death     | 125 | 11.7 | 1.39E-50 | 4.568677407 | 6.42E-47 | 2.47E-48 | 2.63E-47 |
| GOTERM_BP_FAT | GO:0006873~cellular ion homeostasis                         | 127 | 11.9 | 5.01E-50 | 4.455608749 | 2.31E-46 | 8.56E-48 | 9.46E-47 |
| GOTERM_BP_FAT | GO:0051094~positive regulation of developmental process     | 109 | 10.2 | 8.57E-50 | 5.144659442 | 3.95E-46 | 1.41E-47 | 1.62E-46 |
| GOTERM_BP_FAT | GO:0019725~cellular homeostasis                             | 142 | 13.3 | 1.28E-49 | 3.998318229 | 5.90E-46 | 2.03E-47 | 2.41E-46 |
| GOTERM_BP_FAT | GO:0007242~intracellular signaling cascade                  | 249 | 23.2 | 2.18E-49 | 2.601265236 | 1.01E-45 | 3.35E-47 | 4.11E-46 |
| GOTERM_BP_FAT | GO:0006928~cell motion                                      | 143 | 13.4 | 2.86E-49 | 3.950184287 | 1.32E-45 | 4.26E-47 | 5.41E-46 |
| GOTERM_BP_FAT | GO:0031644~regulation of neurological system process        | 81  | 7.56 | 5.37E-49 | 6.946539625 | 2.48E-45 | 7.75E-47 | 1.01E-45 |
| GOTERM_BP_FAT | GO:0043066~negative regulation of apoptosis                 | 122 | 11.4 | 8.65E-49 | 4.522009787 | 3.99E-45 | 1.21E-46 | 1.63E-45 |
| GOTERM_BP_FAT | GO:0050801~ion homeostasis                                  | 130 | 12.1 | 1.42E-47 | 4.170565762 | 6.54E-44 | 1.92E-45 | 2.68E-44 |
| GOTERM_BP_FAT | GO:0048545~response to steroid hormone stimulus             | 87  | 8.12 | 1.23E-45 | 5.945562561 | 5.69E-42 | 1.62E-43 | 2.33E-42 |
| GOTERM_BP_FAT | GO:0006952~defense response                                 | 159 | 14.8 | 2.00E-45 | 3.392320977 | 9.23E-42 | 2.56E-43 | 3.77E-42 |
| GOTERM_BP_FAT | GO:0019226~transmission of nerve impulse                    | 117 | 10.9 | 3.35E-45 | 4.386243592 | 1.54E-41 | 4.17E-43 | 6.32E-42 |
| GOTERM_BP_FAT | GO:0009967~positive regulation of signal transduction       | 107 | 9.99 | 4.46E-45 | 4.759229973 | 2.06E-41 | 5.41E-43 | 8.41E-42 |

|               |                                                                    |     |      |          |             |          |          |          |
|---------------|--------------------------------------------------------------------|-----|------|----------|-------------|----------|----------|----------|
| GOTERM_BP_FAT | GO:0051969~regulation of transmission of nerve impulse             | 76  | 7.1  | 5.72E-45 | 6.783771122 | 2.64E-41 | 6.76E-43 | 1.08E-41 |
| GOTERM_BP_FAT | GO:0030182~neuron differentiation                                  | 129 | 12   | 3.77E-43 | 3.86447524  | 1.74E-39 | 4.34E-41 | 7.11E-40 |
| GOTERM_BP_FAT | GO:0051241~negative regulation of multicellular organismal process | 78  | 7.28 | 9.07E-43 | 6.240590476 | 4.18E-39 | 1.02E-40 | 1.71E-39 |
| GOTERM_BP_FAT | GO:0040012~regulation of locomotion                                | 84  | 7.84 | 1.35E-42 | 5.740543162 | 6.23E-39 | 1.48E-40 | 2.55E-39 |
| GOTERM_BP_FAT | GO:0007268~synaptic transmission                                   | 104 | 9.71 | 5.02E-42 | 4.579225226 | 2.31E-38 | 5.38E-40 | 9.47E-39 |
| GOTERM_BP_FAT | GO:0016477~cell migration                                          | 98  | 9.15 | 2.61E-40 | 4.658991552 | 1.20E-36 | 2.74E-38 | 4.92E-37 |
| GOTERM_BP_FAT | GO:0045597~positive regulation of cell differentiation             | 89  | 8.31 | 3.55E-40 | 5.099521811 | 1.64E-36 | 3.64E-38 | 6.69E-37 |
| GOTERM_BP_FAT | GO:0050804~regulation of synaptic transmission                     | 69  | 6.44 | 4.16E-40 | 6.657100474 | 1.92E-36 | 4.17E-38 | 7.85E-37 |
| GOTERM_BP_FAT | GO:0009628~response to abiotic stimulus                            | 113 | 10.6 | 1.33E-39 | 4.029076878 | 6.15E-36 | 1.31E-37 | 2.51E-36 |
