# Supplementary material for: Molecular Architecture of Spinal Cord Injury Protein Interaction Network
Source: PubMed Central journal article supplement (PMC4524728; doi:10.1371/journal.pone.0135024), 2015-08-04
Supplement: pone.0135024.s007.pdf [file pone.0135024.s007.pdf]

**Supplementary Table V. Gene Ontology (GO) cellular components over-representation in the entire 1083 accessions performed through DAVID.**

| Category      | Term                                                  | Count | %           | PValue   | Fold Enrichment | Bonferroni | Benjamini | FDR      |
|---------------|-------------------------------------------------------|-------|-------------|----------|-----------------|------------|-----------|----------|
| GOTERM_CC_FAT | GO:0005615~extracellular space                        | 201   | 18.767507   | 3.69E-69 | 3.870619873     | 1.93E-66   | 1.93E-66  | 5.35E-66 |
| GOTERM_CC_FAT | GO:0044421~extracellular region part                  | 234   | 21.8487395  | 2.77E-64 | 3.215286378     | 1.44E-61   | 7.22E-62  | 4.01E-61 |
| GOTERM_CC_FAT | GO:0031226~intrinsic to plasma membrane               | 246   | 22.96918768 | 2.30E-51 | 2.670753864     | 1.20E-48   | 4.01E-49  | 3.34E-48 |
| GOTERM_CC_FAT | GO:0044459~plasma membrane part                       | 351   | 32.77310924 | 1.19E-49 | 2.101685149     | 6.22E-47   | 1.55E-47  | 1.73E-46 |
| GOTERM_CC_FAT | GO:0005576~extracellular region                       | 331   | 30.90569561 | 1.51E-49 | 2.172235828     | 7.87E-47   | 1.57E-47  | 2.18E-46 |
| GOTERM_CC_FAT | GO:0005887~integral to plasma membrane                | 237   | 22.12885154 | 4.55E-48 | 2.631521614     | 2.38E-45   | 3.96E-46  | 6.59E-45 |
| GOTERM_CC_FAT | GO:0043005~neuron projection                          | 114   | 10.6442577  | 3.17E-44 | 4.396972824     | 1.65E-41   | 2.36E-42  | 4.59E-41 |
| GOTERM_CC_FAT | GO:0005886~plasma membrane                            | 475   | 44.35107376 | 3.04E-40 | 1.658905553     | 1.59E-37   | 1.98E-38  | 4.40E-37 |
| GOTERM_CC_FAT | GO:0030424~axon                                       | 72    | 6.722689076 | 6.83E-38 | 5.973246101     | 3.57E-35   | 3.96E-36  | 9.90E-35 |
| GOTERM_CC_FAT | GO:0000267~cell fraction                              | 191   | 17.83380019 | 1.92E-30 | 2.326376203     | 1.00E-27   | 1.00E-28  | 2.78E-27 |
| GOTERM_CC_FAT | GO:0042995~cell projection                            | 143   | 13.35200747 | 2.51E-29 | 2.706314694     | 1.31E-26   | 1.19E-27  | 3.64E-26 |
| GOTERM_CC_FAT | GO:0009986~cell surface                               | 94    | 8.776844071 | 2.27E-28 | 3.563064185     | 1.18E-25   | 9.86E-27  | 3.28E-25 |
| GOTERM_CC_FAT | GO:0043025~cell soma                                  | 62    | 5.78898226  | 1.04E-26 | 4.868077055     | 5.41E-24   | 4.16E-25  | 1.50E-23 |
| GOTERM_CC_FAT | GO:0030425~dendrite                                   | 56    | 5.22875817  | 2.00E-22 | 4.531849291     | 1.04E-19   | 7.46E-21  | 2.90E-19 |
| GOTERM_CC_FAT | GO:0031988~membrane-bounded vesicle                   | 112   | 10.45751634 | 1.89E-21 | 2.601026178     | 9.85E-19   | 6.57E-20  | 2.73E-18 |
| GOTERM_CC_FAT | GO:0045202~synapse                                    | 84    | 7.843137255 | 2.74E-21 | 3.121231413     | 1.43E-18   | 8.95E-20  | 3.97E-18 |
| GOTERM_CC_FAT | GO:0031982~vesicle                                    | 123   | 11.48459384 | 8.09E-21 | 2.421616376     | 4.22E-18   | 2.48E-19  | 1.17E-17 |
| GOTERM_CC_FAT | GO:0009897~external side of plasma membrane           | 55    | 5.135387488 | 1.18E-20 | 4.267650094     | 6.14E-18   | 3.41E-19  | 1.70E-17 |
| GOTERM_CC_FAT | GO:0060205~cytoplasmic membrane-bounded vesicle lumen | 28    | 2.614379085 | 7.31E-20 | 8.394220846     | 3.82E-17   | 2.01E-18  | 1.06E-16 |
| GOTERM_CC_FAT | GO:0045121~membrane raft                              | 49    | 4.575163399 | 1.26E-19 | 4.519965071     | 6.59E-17   | 3.29E-18  | 1.83E-16 |
| GOTERM_CC_FAT | GO:0031983~vesicle lumen                              | 28    | 2.614379085 | 3.79E-19 | 8.029254722     | 1.98E-16   | 9.43E-18  | 5.50E-16 |
| GOTERM_CC_FAT | GO:0016023~cytoplasmic membrane-bounded vesicle       | 105   | 9.803921569 | 4.67E-19 | 2.518266254     | 2.44E-16   | 1.11E-17  | 6.77E-16 |
| GOTERM_CC_FAT | GO:0005625~soluble fraction                           | 74    | 6.909430439 | 8.69E-19 | 3.118619703     | 4.53E-16   | 1.97E-17  | 1.26E-15 |
| GOTERM_CC_FAT | GO:0030141~secretory granule                          | 54    | 5.042016807 | 1.19E-18 | 3.957275542     | 6.22E-16   | 2.59E-17  | 1.73E-15 |
| GOTERM_CC_FAT | GO:0031410~cytoplasmic vesicle                        | 115   | 10.73762838 | 1.27E-18 | 2.362859228     | 6.60E-16   | 2.64E-17  | 1.83E-15 |

|               |                                                  |     |             |          |             |          |          |          |
|---------------|--------------------------------------------------|-----|-------------|----------|-------------|----------|----------|----------|
| GOTERM_CC_FAT | GO:0044456~synapse part                          | 64  | 5.975723623 | 1.60E-18 | 3.431783668 | 8.33E-16 | 3.20E-17 | 2.31E-15 |
| GOTERM_CC_FAT | GO:0033267~axon part                             | 29  | 2.707749767 | 7.41E-18 | 7.084011772 | 3.87E-15 | 1.43E-16 | 1.07E-14 |
| GOTERM_CC_FAT | GO:0005626~insoluble fraction                    | 134 | 12.51167134 | 2.68E-17 | 2.10677363  | 1.40E-14 | 5.00E-16 | 3.88E-14 |
| GOTERM_CC_FAT | GO:0044433~cytoplasmic vesicle part              | 53  | 4.948646125 | 3.80E-17 | 3.738602562 | 1.98E-14 | 6.83E-16 | 5.50E-14 |
| GOTERM_CC_FAT | GO:0031093~platelet alpha granule lumen          | 25  | 2.33426704  | 3.98E-17 | 8.043242971 | 2.08E-14 | 6.93E-16 | 5.77E-14 |
| GOTERM_CC_FAT | GO:0031091~platelet alpha granule                | 28  | 2.614379085 | 3.13E-16 | 6.595459236 | 1.74E-13 | 5.66E-15 | 4.77E-13 |
| GOTERM_CC_FAT | GO:0043235~receptor complex                      | 40  | 3.734827264 | 4.27E-16 | 4.548592577 | 2.32E-13 | 7.22E-15 | 6.44E-13 |
| GOTERM_CC_FAT | GO:0005624~membrane fraction                     | 124 | 11.57796452 | 1.93E-14 | 2.021846589 | 1.01E-11 | 3.06E-13 | 2.80E-11 |
| GOTERM_CC_FAT | GO:0045211~postsynaptic membrane                 | 41  | 3.828197946 | 2.01E-14 | 4.006130795 | 1.05E-11 | 3.09E-13 | 2.91E-11 |
| GOTERM_CC_FAT | GO:0044463~cell projection part                  | 55  | 5.135387488 | 6.67E-14 | 3.100429556 | 3.48E-11 | 9.95E-13 | 9.67E-11 |
| GOTERM_CC_FAT | GO:0043679~nerve terminal                        | 21  | 1.960784314 | 1.47E-13 | 7.486737512 | 7.66E-11 | 2.13E-12 | 2.12E-10 |
| GOTERM_CC_FAT | GO:0043195~terminal button                       | 17  | 1.587301587 | 1.11E-12 | 8.969824561 | 5.78E-10 | 1.56E-11 | 1.60E-09 |
| GOTERM_CC_FAT | GO:0043204~perikaryon                            | 17  | 1.587301587 | 5.48E-11 | 7.474853801 | 2.86E-08 | 7.53E-10 | 7.95E-08 |
| GOTERM_CC_FAT | GO:0031012~extracellular matrix                  | 63  | 5.882352941 | 1.05E-10 | 2.408776417 | 5.46E-08 | 1.40E-09 | 1.52E-07 |
| GOTERM_CC_FAT | GO:0008328~ionotropic glutamate receptor complex | 12  | 1.120448179 | 1.31E-10 | 11.30650155 | 6.84E-08 | 1.71E-09 | 1.90E-07 |
| GOTERM_CC_FAT | GO:0031594~neuromuscular junction                | 14  | 1.307189542 | 6.51E-10 | 8.394220846 | 3.40E-07 | 8.29E-09 | 9.44E-07 |
| GOTERM_CC_FAT | GO:0014069~postsynaptic density                  | 24  | 2.240896359 | 1.02E-09 | 4.458902019 | 5.33E-07 | 1.27E-08 | 1.48E-06 |
| GOTERM_CC_FAT | GO:0005829~cytosol                               | 159 | 14.84593838 | 2.57E-09 | 1.576959426 | 1.34E-06 | 3.12E-08 | 3.73E-06 |
| GOTERM_CC_FAT | GO:0005901~caveola                               | 20  | 1.867413632 | 2.95E-09 | 5.073430182 | 1.54E-06 | 3.50E-08 | 4.28E-06 |
| GOTERM_CC_FAT | GO:0042734~presynaptic membrane                  | 15  | 1.400560224 | 4.92E-09 | 6.822888865 | 2.57E-06 | 5.70E-08 | 7.12E-06 |
| GOTERM_CC_FAT | GO:0005578~proteinaceous extracellular matrix    | 53  | 4.948646125 | 1.11E-07 | 2.184745872 | 5.80E-05 | 1.26E-06 | 1.61E-04 |
| GOTERM_CC_FAT | GO:0031225~anchored to membrane                  | 40  | 3.734827264 | 4.62E-07 | 2.398348813 | 2.41E-04 | 5.13E-06 | 6.70E-04 |
| GOTERM_CC_FAT | GO:0032838~cell projection cytoplasm             | 7   | 0.653594771 | 1.22E-06 | 13.19091847 | 6.35E-04 | 1.32E-05 | 0.00176  |
