# Supplementary material for: Molecular Architecture of Spinal Cord Injury Protein Interaction Network
Source: PubMed Central journal article supplement (PMC4524728; doi:10.1371/journal.pone.0135024), 2015-08-04
Supplement: pone.0135024.s008.pdf [file pone.0135024.s008.pdf]

**Supplementary Table VI. KEGG pathway enrichment on the entire 1083 accessions performed through DAVID.**

| Category     | Term                                             | Count | %   | PValue   | Fold Enrichment | Bonferroni | Benjamini | FDR      |
|--------------|--------------------------------------------------|-------|-----|----------|-----------------|------------|-----------|----------|
| KEGG_PATHWAY | hsa05200:Pathways in cancer                      | 130   | 12  | 5.80E-31 | 2.73831025      | 9.80E-29   | 9.80E-29  | 7.07E-28 |
| KEGG_PATHWAY | hsa04080:Neuroactive ligand-receptor interaction | 104   | 9.7 | 1.39E-25 | 2.806768        | 2.35E-23   | 1.17E-23  | 1.69E-22 |
| KEGG_PATHWAY | hsa04610:Complement and coagulation cascades     | 45    | 4.2 | 3.66E-21 | 4.5058483       | 6.19E-19   | 2.06E-19  | 4.46E-18 |
| KEGG_PATHWAY | hsa04210:Apoptosis                               | 50    | 4.7 | 4.22E-20 | 3.97067091      | 7.12E-18   | 1.78E-18  | 5.14E-17 |
| KEGG_PATHWAY | hsa04620:Toll-like receptor signaling pathway    | 54    | 5   | 9.15E-20 | 3.69390336      | 1.55E-17   | 3.09E-18  | 1.12E-16 |
| KEGG_PATHWAY | hsa04060:Cytokine-cytokine receptor interaction  | 95    | 8.9 | 3.03E-19 | 2.50515993      | 5.12E-17   | 8.53E-18  | 3.69E-16 |
| KEGG_PATHWAY | hsa04020:Calcium signaling pathway               | 73    | 6.8 | 1.57E-18 | 2.86565125      | 2.65E-16   | 3.78E-17  | 1.91E-15 |
| KEGG_PATHWAY | hsa04722:Neurotrophin signaling pathway          | 59    | 5.5 | 2.06E-18 | 3.28733126      | 3.48E-16   | 4.35E-17  | 2.51E-15 |
| KEGG_PATHWAY | hsa05215:Prostate cancer                         | 48    | 4.5 | 8.45E-18 | 3.72618466      | 1.43E-15   | 1.59E-16  | 1.03E-14 |
| KEGG_PATHWAY | hsa05212:Pancreatic cancer                       | 42    | 3.9 | 3.05E-17 | 4.03023098      | 5.16E-15   | 5.16E-16  | 3.72E-14 |
| KEGG_PATHWAY | hsa05014:Amyotrophic lateral sclerosis (ALS)     | 35    | 3.3 | 9.81E-17 | 4.56252564      | 1.88E-14   | 1.67E-15  | 1.33E-13 |
| KEGG_PATHWAY | hsa04010:MAPK signaling pathway                  | 89    | 8.3 | 2.79E-15 | 2.30298913      | 4.69E-13   | 3.91E-14  | 3.39E-12 |
| KEGG_PATHWAY | hsa04370:VEGF signaling pathway                  | 40    | 3.7 | 1.29E-14 | 3.68478261      | 2.18E-12   | 1.67E-13  | 1.57E-11 |
| KEGG_PATHWAY | hsa05214:Glioma                                  | 36    | 3.4 | 2.14E-14 | 3.94798137      | 3.62E-12   | 2.59E-13  | 2.61E-11 |
| KEGG_PATHWAY | hsa05218:Melanoma                                | 38    | 3.5 | 5.74E-14 | 3.6977572       | 9.70E-12   | 6.47E-13  | 7.00E-11 |
| KEGG_PATHWAY | hsa04510:Focal adhesion                          | 71    | 6.6 | 1.16E-13 | 2.44048102      | 1.97E-11   | 1.23E-12  | 1.42E-10 |
| KEGG_PATHWAY | hsa05223:Non-small cell lung cancer              | 32    | 3   | 2.03E-13 | 4.0942029       | 3.44E-11   | 2.02E-12  | 2.48E-10 |
| KEGG_PATHWAY | hsa04360:Axon guidance                           | 53    | 4.9 | 2.85E-13 | 2.838568        | 4.82E-11   | 2.68E-12  | 3.48E-10 |
| KEGG_PATHWAY | hsa05020:Prion diseases                          | 25    | 2.3 | 4.24E-13 | 4.93497671      | 7.16E-11   | 3.77E-12  | 5.17E-10 |
| KEGG_PATHWAY | hsa04920:Adipocytokine signaling pathway         | 35    | 3.3 | 1.69E-12 | 3.60916207      | 2.85E-10   | 1.43E-11  | 2.06E-09 |
| KEGG_PATHWAY | hsa04012:ErbB signaling pathway                  | 40    | 3.7 | 5.77E-12 | 3.17653673      | 9.75E-10   | 4.64E-11  | 7.03E-09 |
| KEGG_PATHWAY | hsa05222:Small cell lung cancer                  | 39    | 3.6 | 7.70E-12 | 3.20773486      | 1.30E-09   | 5.91E-11  | 9.38E-09 |
| KEGG_PATHWAY | hsa05210:Colorectal cancer                       | 39    | 3.6 | 7.70E-12 | 3.20773486      | 1.30E-09   | 5.91E-11  | 9.38E-09 |
| KEGG_PATHWAY | hsa04912:GnRH signaling pathway                  | 42    | 3.9 | 2.50E-11 | 2.96098602      | 4.23E-09   | 1.84E-10  | 3.05E-08 |
| KEGG_PATHWAY | hsa05219:Bladder cancer                          | 25    | 2.3 | 1.30E-10 | 4.11248059      | 2.21E-08   | 9.19E-10  | 1.59E-07 |

|              |                                                                     |    |     |          |            |             |          |             |
|--------------|---------------------------------------------------------------------|----|-----|----------|------------|-------------|----------|-------------|
| KEGG_PATHWAY | hsa04621:NOD-like receptor signaling pathway                        | 31 | 2.9 | 1.64E-10 | 3.4544837  | 2.77E-08    | 1.11E-09 | 2.00E-07    |
| KEGG_PATHWAY | hsa05221:Acute myeloid leukemia                                     | 29 | 2.7 | 7.25E-10 | 3.4544837  | 1.23E-07    | 4.72E-09 | 8.84E-07    |
| KEGG_PATHWAY | hsa04660:T cell receptor signaling pathway                          | 42 | 3.9 | 9.17E-10 | 2.68682065 | 1.55E-07    | 5.74E-09 | 1.12E-06    |
| KEGG_PATHWAY | hsa04540:Gap junction                                               | 36 | 3.4 | 5.42E-09 | 2.7946385  | 9.16E-07    | 3.27E-08 | 6.61E-06    |
| KEGG_PATHWAY | hsa05213:Endometrial cancer                                         | 26 | 2.4 | 6.72E-09 | 3.4544837  | 1.14E-06    | 3.92E-08 | 8.19E-06    |
| KEGG_PATHWAY | hsa04664:Fc epsilon RI signaling pathway                            | 33 | 3.1 | 7.27E-09 | 2.92302467 | 1.23E-06    | 4.09E-08 | 8.86E-06    |
| KEGG_PATHWAY | hsa04640:Hematopoietic cell lineage                                 | 35 | 3.3 | 7.67E-09 | 2.81178905 | 1.30E-06    | 4.18E-08 | 9.34E-06    |
| KEGG_PATHWAY | hsa04062:Chemokine signaling pathway                                | 56 | 5.2 | 6.16E-08 | 2.06899558 | 1.04E-05    | 3.25E-07 | 7.51E-05    |
| KEGG_PATHWAY | hsa05220:Chronic myeloid leukemia                                   | 30 | 2.8 | 1.75E-07 | 2.76358696 | 2.96E-05    | 8.97E-07 | 2.13E-04    |
| KEGG_PATHWAY | hsa04720:Long-term potentiation                                     | 28 | 2.6 | 2.47E-07 | 2.84486893 | 4.18E-05    | 1.23E-06 | 3.02E-04    |
| KEGG_PATHWAY | hsa04910:Insulin signaling pathway                                  | 43 | 4   | 4.45E-07 | 2.20063406 | 7.52E-05    | 2.15E-06 | 5.42E-04    |
| KEGG_PATHWAY | hsa04914:Progesterone-mediated oocyte maturation                    | 31 | 2.9 | 1.45E-06 | 2.49044173 | 2.44E-04    | 6.78E-06 | 0.001761342 |
| KEGG_PATHWAY | hsa04630:Jak-STAT signaling pathway                                 | 46 | 4.3 | 1.52E-06 | 2.05040323 | 2.56E-04    | 6.93E-06 | 0.001849379 |
| KEGG_PATHWAY | hsa05216:Thyroid cancer                                             | 16 | 1.5 | 2.35E-06 | 3.81184408 | 3.96E-04    | 1.04E-05 | 0.002858424 |
| KEGG_PATHWAY | hsa04662:B cell receptor signaling pathway                          | 28 | 2.6 | 2.43E-06 | 2.57934783 | 4.10E-04    | 1.05E-05 | 0.002956013 |
| KEGG_PATHWAY | hsa05010:Alzheimer's disease                                        | 47 | 4.4 | 2.76E-06 | 1.99215624 | 4.67E-04    | 1.17E-05 | 0.003365885 |
| KEGG_PATHWAY | hsa05120:Epithelial cell signaling in Helicobacter pylori infection | 26 | 2.4 | 3.69E-06 | 2.641664   | 6.24E-04    | 1.52E-05 | 0.004503097 |
| KEGG_PATHWAY | hsa05211:Renal cell carcinoma                                       | 26 | 2.4 | 6.76E-06 | 2.56618789 | 0.001141046 | 2.72E-05 | 0.008233181 |
| KEGG_PATHWAY | hsa04622:RIG-I-like receptor signaling pathway                      | 26 | 2.4 | 9.03E-06 | 2.5300444  | 0.00152452  | 3.55E-05 | 0.011002081 |
| KEGG_PATHWAY | hsa04930:Type II diabetes mellitus                                  | 20 | 1.9 | 1.12E-05 | 2.93998612 | 0.00189161  | 4.30E-05 | 0.013653611 |
| KEGG_PATHWAY | hsa04670:Leukocyte transendothelial migration                       | 36 | 3.4 | 1.34E-05 | 2.10782056 | 0.002267543 | 5.04E-05 | 0.016369947 |
| KEGG_PATHWAY | hsa04730:Long-term depression                                       | 25 | 2.3 | 1.73E-05 | 2.50324905 | 0.002917261 | 6.35E-05 | 0.021066778 |
| KEGG_PATHWAY | hsa04270:Vascular smooth muscle contraction                         | 34 | 3.2 | 2.75E-05 | 2.0973651  | 0.004643059 | 9.90E-05 | 0.033556438 |
| KEGG_PATHWAY | hsa04115:p53 signaling pathway                                      | 23 | 2.1 | 1.34E-04 | 2.33685662 | 0.022374111 | 4.71E-04 | 0.16305354  |
| KEGG_PATHWAY | hsa04150:mTOR signaling pathway                                     | 19 | 1.8 | 2.08E-04 | 2.52443039 | 0.03460841  | 7.19E-04 | 0.25368242  |
| KEGG_PATHWAY | hsa04916:Melanogenesis                                              | 29 | 2.7 | 2.40E-04 | 2.02383893 | 0.039747462 | 8.11E-04 | 0.29206955  |
| KEGG_PATHWAY | hsa04810:Regulation of actin cytoskeleton                           | 51 | 4.8 | 2.89E-04 | 1.63887133 | 0.047633744 | 9.57E-04 | 0.351349974 |
| KEGG_PATHWAY | hsa04350:TGF-beta signaling pathway                                 | 25 | 2.3 | 9.71E-04 | 1.98533546 | 0.151439853 | 0.003153 | 1.177270698 |
