# Supplementary material for: Molecular Architecture of Spinal Cord Injury Protein Interaction Network
Source: PubMed Central journal article supplement (PMC4524728; doi:10.1371/journal.pone.0135024), 2015-08-04
Supplement: pone.0135024.s010.pdf [file pone.0135024.s010.pdf]

**Supplementary Table VIII. Distribution of core rich-club proteins across biological pathways using PantherDB.**

| Pathway                                                                    | Percent genes |
|----------------------------------------------------------------------------|---------------|
| <b>Pathways of Cell Death</b>                                              |               |
| Apoptosis signaling pathway (P00006)                                       | 5.3%          |
| p53 pathway (P00059)                                                       | 4.5%          |
| Ras Pathway (P04393)                                                       | 2.4%          |
| FAS signaling pathway (P00020)                                             | 1.7%          |
| JAK/STAT signaling pathway (P00038)                                        | 1.4%          |
| p38 MAPK pathway (P05918)                                                  | 1.2%          |
| <b>Hormone Signaling Pathways</b>                                          |               |
| CCKR signaling map (P06959)                                                | 8.4%          |
| Gonadotropin releasing hormone receptor pathway (P06664)                   | 6.5%          |
| <b>Growth Factor Signaling</b>                                             |               |
| Angiogenesis (P00005)                                                      | 5.3%          |
| EGF receptor signaling pathway (P00018)                                    | 4.2%          |
| PDGF signaling pathway (P00047)                                            | 4.1%          |
| FGF signaling pathway (P00021)                                             | 3.2%          |
| VEGF signaling pathway (P00056)                                            | 2.6%          |
| TGF-beta signaling pathway (P00052)                                        | 2.3%          |
| Insulin/IGF pathway                                                        | 1.5%          |
| <b>Immune and Inflammatory Pathways</b>                                    |               |
| Inflammation mediated by chemokine and cytokine signaling pathway (P00031) | 7.8%          |
| Interleukin signaling pathway (P00036)                                     | 4.7%          |
| Blood coagulation (P00011)                                                 | 2.9%          |
| Toll receptor signaling pathway (P00054)                                   | 2.7%          |
| T cell activation (P00053)                                                 | 2.7%          |
| B cell activation (P00010)                                                 | 2.6%          |
| Interferon-gamma signaling pathway (P00035)                                | 1.5%          |
| Plasminogen activating cascade (P00050)                                    | 1.5%          |
| Oxidative stress response (P00046)                                         | 1.2%          |
| <b>Cell Signaling Pathways</b>                                             |               |
| Heterotrimeric G-protein signaling pathway (P00027)                        | 6.0%          |
| Integrin signalling pathway (P00034)                                       | 3.6%          |
| PI3 kinase pathway (P00048)                                                | 2.9%          |
| Axon Guidance                                                              | 2.3%          |
| Endothelin signaling pathway (P00019)                                      | 2.3%          |
| Wnt signaling pathway (P00057)                                             | 1.4%          |
