# Supplementary material for: Molecular Architecture of Spinal Cord Injury Protein Interaction Network
Source: PubMed Central journal article supplement (PMC4524728; doi:10.1371/journal.pone.0135024), 2015-08-04
Supplement: pone.0135024.s011.pdf [file pone.0135024.s011.pdf]

**Supplementary Table IX. Weighted degrees of the different rich-club modules within the module interaction network.**

| <b>Module</b>                                                             | <b>Weighted Degree</b> |
|---------------------------------------------------------------------------|------------------------|
| Developmental Processes                                                   | 2670                   |
| Immune System Process                                                     | 2407                   |
| Cell Communication                                                        | 1651                   |
| Response To Stress                                                        | 907                    |
| G-Protein Coupled Receptor Signaling Pathway                              | 866                    |
| Inflammatory Response                                                     | 848                    |
| Cell Surface Receptor Linked Signal Transduction                          | 693                    |
| Platelet Activation                                                       | 676                    |
| Apoptotic Processes                                                       | 655                    |
| Adenylate Cyclase-Modulating G-Protein Coupled Receptor Signaling Pathway | 512                    |
| Signal Transduction                                                       | 474                    |
| Non-Enriched Module                                                       | 431                    |
| Angiogenesis                                                              | 384                    |
| Cell-Cell Signaling                                                       | 250                    |
| Toll-Like Receptor Signaling Pathway                                      | 244                    |
| Response To Chemical                                                      | 240                    |
| Regulation Of Apoptotic Signaling Pathway                                 | 229                    |
| Response To Hypoxia                                                       | 216                    |
| Response To Growth Factor                                                 | 199                    |
| Cellular Response To Organic Substances                                   | 157                    |
| Carbohydrate Derivative Metabolic Process                                 | 152                    |
| Extracellular Matrix Organization                                         | 152                    |
| Synaptic Transmission                                                     | 134                    |
| Regulation Of Nervous System Development                                  | 110                    |
| Steroid Hormone Mediated Signaling Pathway                                | 87                     |
| Activation Of Protein Kinase Activity                                     | 66                     |
